# Supplementary material for: Reversible Kinetic Analysis of Myc Targets In vivo Provides Novel Insights into Myc-Mediated Tumorigenesis
Source: Oxford University Press journal article supplement (doi:10.1158/0008-5472.can-05-3826), 2006-05-01
Supplement: 00085472can053826-sup-supplementary_tables_1-5.xls [file 00085472can053826-sup-supplementary_tables_1-5.xls]

## Sheet: Table 1_24hr
Supplementary Table 1: 285 Probe-sets significant in 24 hrs
Probe Set ID	Gene Title	Gene Symbol	RefSeq Transcript ID
103362_at	---	---	---
103530_at	---	---	---
103635_at	---	---	---
104298_at	---	---	---
161147_f_at	---	---	---
161310_at	---	---	---
93932_at	---	---	---
95514_at	---	---	---
97951_s_at	---	---	---
98943_at	---	---	---
103760_at	RIKEN cDNA 0610039J04 gene	0610039J04Rik	NM_025615
99616_s_at	RIKEN cDNA 0610040D20 gene	0610040D20Rik	NM_023153
97807_at	RIKEN cDNA 1110021H02 gene	1110021H02Rik	NM_025388
104077_at	RIKEN cDNA 1110049G11 gene	1110049G11Rik	NM_025410
96621_at	RIKEN cDNA 1110061L23 gene	1110061L23Rik	NM_029406
160359_at	RIKEN cDNA 1190002H23 gene	1190002H23Rik	NM_025427
92817_at	RIKEN cDNA 1190002L16 gene	1190002L16Rik	NM_133976
93975_at	RIKEN cDNA 1300002F13 gene	1300002F13Rik	NM_133753
97401_at	RIKEN cDNA 1300006C06 gene	1300006C06Rik	NM_028792
98938_at	RIKEN cDNA 1500026D16 gene	1500026D16Rik	NM_026616
97271_at	RIKEN cDNA 1500034E06 gene	1500034E06Rik	NM_030083
98890_at	RIKEN cDNA 1700012G19 gene	1700012G19Rik	NM_025954
160145_at	RIKEN cDNA 1810010M01 gene	1810010M01Rik	NM_026918
95137_at	RIKEN cDNA 1810014L12 gene	1810014L12Rik	NM_133706
96713_at	RIKEN cDNA 1810018P12 gene	1810018P12Rik	---
95406_at	RIKEN cDNA 1810037I17 gene	1810037I17Rik	NM_024461
95501_at	RIKEN cDNA 2410001C21 gene	2410001C21Rik	NM_025542
160727_at	RIKEN cDNA 2410002F23 gene	2410002F23Rik	NM_025880
100917_at	RIKEN cDNA 2410080P20 gene	2410080P20Rik	NM_026464
96885_at	RIKEN cDNA 2510015F01 gene	2510015F01Rik	XM_354801
160845_at	RIKEN cDNA 2600001J17 gene	2600001J17Rik	NM_027411
97252_at	RIKEN cDNA 2610012O22 gene	2610012O22Rik	NM_023536
93568_i_at	RIKEN cDNA 2610042L04 gene	2610042L04Rik	NM_025940
93569_f_at	RIKEN cDNA 2610042L04 gene	2610042L04Rik	NM_025940
102011_at	RIKEN cDNA 2610507L03 gene	2610507L03Rik	NM_028120
96016_at	RIKEN cDNA 2700094K13 gene	2700094K13Rik	---
97374_at	RIKEN cDNA 2810025M15 gene	2810025M15Rik	NM_027274
94243_at	RIKEN cDNA 4930432B04 gene	4930432B04Rik	XM_130287
160119_at	RIKEN cDNA 5730592L21 gene	5730592L21Rik	NM_029720
94211_at	RIKEN cDNA 6720460F02 gene	6720460F02Rik	NM_144526
104326_at	ADP-dependent glucokinase	Adpgk	NM_028121
98999_at	adenylosuccinate lyase	Adsl	NM_009634
94390_at	A kinase (PRKA) anchor protein 8	Akap8	NM_019774
95001_at	A kinase (PRKA) anchor protein 8	Akap8	NM_019774
96891_at	acidic nuclear phosphoprotein 32 family, member B	Anp32b	NM_130889
160581_at	APG16 autophagy 16-like (S. cerevisiae)	Apg16l	NM_029846
97811_at	ADP-ribosylation factor GTPase activating protein 3	Arfgap3	NM_025445
160371_at	ADP-ribosylation factor-like 6 interacting protein 1	Arl6ip1	NM_019419
92375_at	activating signal cointegrator 1 complex subunit 1	Ascc1	NM_026937
99128_at	ATP synthase, H+ transporting, mitochondrial F1 complex, O subunit	Atp5o	NM_138597
92603_at	ATPase, H+ transporting, V0 subunit D isoform 1	Atp6v0d1	NM_013477
92639_at	aurora kinase A	Aurka	NM_011497
98469_at	aurora kinase B	Aurkb	NM_011496
102982_at	RIKEN cDNA B230308N11 gene	B230308N11Rik	---
99670_at	Bcl-associated death promoter	Bad	NM_007522
160366_at	cDNA sequence BC031181	BC031181	NM_001001181
96518_at	cDNA sequence BC037006	BC037006	XM_109956
98545_at	B-cell receptor-associated protein 37	Bcap37	NM_007531
101557_at	branched chain ketoacid dehydrogenase kinase	Bckdk	NM_009739
98433_at	BH3 interacting domain death agonist	Bid	NM_007544
101521_at	baculoviral IAP repeat-containing 5	Birc5	NM_009689
160878_at	block of proliferation 1	Bop1	NM_013481
102911_at	breast cancer 2	Brca2	NM_009765
95753_at	barren homolog (Drosophila)	Brrn1	NM_144818
97095_at	Budding uninhibited by benzimidazoles 1 homolog (S. cerevisiae)	Bub1	NM_009772
160227_s_at	bystin-like	Bysl	NM_016859
95462_at	basic leucine zipper and W2 domains 2	Bzw2	NM_025840
160973_at	RIKEN cDNA C330027C09 gene	C330027C09Rik	NM_172616
103308_at	expressed sequence C79407	C79407	NM_172578
103682_at	expressed sequence C80913	C80913	NM_011274
99169_at	coactivator-associated arginine methyltransferase 1	Carm1	NM_021531
104290_at	caspase 8 associated protein 2	Casp8ap2	NM_011997
99186_at	cyclin A2	Ccna2	NM_009828
160159_at	cyclin B1, related sequence 1 /// cyclin B1	Ccnb1-rs1 /// Ccnb1	NM_172301
94294_at	cyclin B2	Ccnb2	NM_007630
94232_at	cyclin D1	Ccnd1	NM_007631
99073_at	cyclin F	Ccnf	NM_007634
96319_at	cell division cycle 20 homolog (S. cerevisiae)	Cdc20	NM_023223
102934_s_at	cell division cycle 25 homolog C (S. cerevisiae)	Cdc25c	NM_009860
102935_at	cell division cycle 25 homolog C (S. cerevisiae)	Cdc25c	NM_009860
100128_at	cell division cycle 2 homolog A (S. pombe)	Cdc2a	NM_007659
103821_at	cell division cycle 6 homolog (S. cerevisiae)	Cdc6	NM_011799
103797_at	cell division cycle 7 (S. cerevisiae)	Cdc7	NM_009863
94217_f_at	cell division cycle associated 3	Cdca3	NM_013538
160699_at	cell division cycle associated 5	Cdca5	NM_026410
95063_at	cell division cycle associated 7	Cdca7	NM_025866
97295_at	cell division cycle associated 8	Cdca8	NM_026560
94971_at	cyclin-dependent kinase inhibitor 3	Cdkn3	XM_484366
160326_at	carnitine deficiency-associated gene expressed in ventricle 3	Cdv3	NM_175565 /// NM_175833
103064_at	checkpoint kinase 1 homolog (S. pombe)	Chek1	NM_007691
104322_at	cytoskeleton associated protein 2	Ckap2	NM_001004140
97468_at	CDC28 protein kinase 1b	Cks1b	NM_016904
97527_at	CDC28 protein kinase regulatory subunit 2	Cks2	NM_025415
95646_at	carnitine palmitoyltransferase 2	Cpt2	NM_009949
161046_at	cytokine receptor-like factor 1	Crlf1	NM_018827
161522_i_at	cystatin C	Cst3	NM_009976
103341_at	cytidine 5'-triphosphate synthase	Ctps	NM_016748
95656_i_at	DNA segment, Chr 13, Wayne State University 177, expressed	D13Wsu177e	NM_178605
95679_at	DNA segment, Chr 19, ERATO Doi 144, expressed	D19Ertd144e	NM_026373
95428_at	DNA segment, Chr 1, Wayne State University 40, expressed	D1Wsu40e	NM_178601
93842_at	death-associated protein	Dap	NM_146057
96636_at	dynactin 5	Dctn5	NM_021608
160074_at	dopa decarboxylase	Ddc	NM_016672
160769_at	Der1-like domain family, member 2	Derl2	NM_033562
98489_at	discs, large homolog 7 (Drosophila)	Dlg7	NM_144553
101975_at	delta-like 1 homolog (Drosophila)	Dlk1	NM_010052
101445_at	DNA methyltransferase (cytosine-5) 1	Dnmt1	NM_010066
92634_at	dipeptidylpeptidase 4	Dpp4	NM_010074
101104_at	Down syndrome critical region gene 3	Dscr3	NM_007834
98995_at	E2F transcription factor 5	E2f5	NM_007892
93754_at	enoyl coenzyme A hydratase 1, peroxisomal	Ech1	NM_016772
97411_at	ect2 oncogene	Ect2	NM_007900
96942_at	eukaryotic translation initiation factor 3, subunit 6 interacting protein	Eif3s6ip	NM_145139
100636_at	eukaryotic translation initiation factor 4E binding protein 1	Eif4ebp1	NM_007918
103665_at	ELOVL family member 6, elongation of long chain fatty acids (yeast)	Elovl6	NM_130450
98992_at	endothelial precursor protein B9	Eppb9	NM_013717
96947_at	electron transferring flavoprotein, beta polypeptide	Etfb	NM_026695
97869_at	electron transferring flavoprotein, dehydrogenase	Etfdh	NM_025794
99917_at	enhancer of zeste homolog 2 (Drosophila)	Ezh2	NM_007971
160424_f_at	farnesyl diphosphate synthetase	Fdps	NM_134469
99098_at	farnesyl diphosphate synthetase	Fdps	NM_134469
99546_at	FK506 binding protein 2	Fkbp2	NM_008020
94297_at	FK506 binding protein 5	Fkbp5	NM_010220
99844_at	frizzled homolog 9 (Drosophila)	Fzd9	XM_284144
103061_at	glutamic acid decarboxylase 1	Gad1	NM_008077
101979_at	growth arrest and DNA-damage-inducible 45 gamma	Gadd45g	NM_011817
97313_at	guanosine diphosphate (GDP) dissociation inhibitor 1	Gdi1	NM_010273
102926_at	glial cell line derived neurotrophic factor family receptor alpha 3	Gfra3	NM_010280
96925_at	glycosyltransferase 25 domain containing 1	Glt25d1	NM_146211
92615_at	gene model 137, (NCBI)	Gm137	XM_131359
93647_at	Gem-interacting protein	Gmip	NM_198101
93951_at	golgi autoantigen, golgin subfamily a, 3	Golga3	NM_008146
102040_at	G protein-coupled receptor kinase 6	Gprk6	NM_011938
99583_at	glutathione S-transferase, pi 1	Gstp1	NM_013541
103270_at	G two S phase expressed protein 1	Gtse1	NM_013882
92180_at	H1 histone family, member X	H1fx	NM_198622
101954_at	H2A histone family, member Z	H2afz	NM_016750
96359_at	high density lipoprotein (HDL) binding protein	Hdlbp	NM_133808
95057_at	homocysteine-inducible, endoplasmic reticulum stress-inducible, ubiquitin-like domain member 1	Herpud1	NM_022331
94365_at	histidine triad nucleotide binding protein 2	Hint2	XM_143732
93276_at	hematological and neurological expressed sequence 1	Hn1	NM_008258
101562_at	heat shock 70kDa protein 14	Hspa14	NM_015765
92571_at	heat shock protein 4	Hspa4	NM_008300
101955_at	heat shock 70kD protein 5 (glucose-regulated protein)	Hspa5	NM_022310
104760_at	interferon-related developmental regulator 2	Ifrd2	NM_025903
161023_at	interleukin 15 receptor, alpha chain	Il15ra	NM_008358 /// NM_133836
93758_at	inner centromere protein	Incenp	NM_016692
98821_at	insulin promoter factor 1, homeodomain transcription factor	Ipf1	NM_008814
100466_f_at	IQ motif containing F4 /// gene model 1673, (NCBI)	Iqcf4 /// Gm1673	NM_026090 /// XM_358631
98467_at	inter alpha-trypsin inhibitor, heavy chain 4	Itih4	NM_018746
100961_at	potassium voltage-gated channel, subfamily H (eag-related), member 2	Kcnh2	NM_013569
160501_at	kinesin family member 20A	Kif20a	NM_009004
161856_f_at	kinesin family member 20A	Kif20a	NM_009004
95118_r_at	kinesin family member 22	Kif22	NM_145588
160755_at	kinesin family member 2C	Kif2c	NM_134471
104644_at	kinesin family member 4	Kif4	NM_008446
98471_f_at	kinesin family member C1	Kifc1	NM_016761
100719_f_at	kallikrein 16	Klk16	NM_008454
93441_at	kinetochore associated 2 /// RIKEN cDNA 2700099C18 gene /// similar to HEC protein; highly expressed in cancer, rich in leucine heptad repeats	Kntc2 /// 2700099C18Rik /// LOC385028	NM_023294 /// XM_358002
94270_at	keratin complex 1, acidic, gene 18	Krt1-18	NM_010664
101009_at	keratin complex 2, basic, gene 8	Krt2-8	NM_031170
92759_at	laminin, beta 3	Lamb3	NM_008484
100428_at	laminin, gamma 2	Lamc2	NM_008485
103656_at	LanC (bacterial lantibiotic synthetase component C)-like 1	Lancl1	NM_021295
160832_at	Low density lipoprotein receptor	Ldlr	NM_010700
93939_at	linker of T-cell receptor pathways	Lnk	NM_008507
97358_at	Latrophilin 1	Lphn1	NM_181039
93008_at	LSM4 homolog, U6 small nuclear RNA associated (S. cerevisiae)	Lsm4	NM_015816
99632_at	MAD2 (mitotic arrest deficient, homolog)-like 1 (yeast)	Mad2l1	NM_019499
160287_at	microtubule-associated protein 1 light chain 3 beta	Map1lc3b	NM_026160
100062_at	minichromosome maintenance deficient 3 (S. cerevisiae)	Mcm3	NM_008563
160496_s_at	minichromosome maintenance deficient 3 (S. cerevisiae)	Mcm3	NM_008563
100156_at	minichromosome maintenance deficient 5, cell division cycle 46 (S. cerevisiae)	Mcm5	NM_008566
98110_at	transformed mouse 3T3 cell double minute 2	Mdm2	NM_010786
104730_at	midasin homolog (yeast)	Mdn1	XM_131338 /// XM_485364 /// XM_485365
96935_at	membrane-associated protein 17	MGI:1914432	NM_026018
160337_at	myo-inositol 1-phosphate synthase A1	MGI:1919030	NM_023627
95497_at	timeless interacting protein	MGI:1921571	NM_025372
99457_at	antigen identified by monoclonal antibody Ki 67	Mki67	XM_133912
96059_at	mitochondrial ribosomal protein L48	Mrpl48	NM_026971 /// NM_198831
95498_at	mitochondrial ribosomal protein S15	Mrps15	NM_025544
101085_at	mitochondrial ribosomal protein S24	Mrps24	NM_026080
96864_at	mitochondrial ribosomal protein S26	Mrps26	NM_207207
98417_at	myxovirus (influenza virus) resistance 1	Mx1	NM_010846
160138_at	Max interacting protein 1	Mxi1	NM_001008542 /// NM_001008543 /// NM_010847
160237_at	NADH dehydrogenase (ubiquinone) 1 alpha subcomplex, 6 (B14)	Ndufa6	NM_025987
100079_at	NADH dehydrogenase (ubiquinone) 1 beta subcomplex, 9	Ndufb9	NM_023172
100885_at	NIMA (never in mitosis gene a)-related expressed kinase 2	Nek2	NM_010892
94351_r_at	NAD(P)H dehydrogenase, quinone 1	Nqo1	NM_008706
93673_at	neurturin	Nrtn	NM_008738
94450_at	NOL1/NOP2/Sun domain family 2	Nsun2	NM_145354
94452_g_at	NOL1/NOP2/Sun domain family 2	Nsun2	NM_145354
161000_i_at	nucleolar and spindle associated protein 1	Nusap1	NM_133851
92845_at	3-oxoacid CoA transferase 1	Oxct1	NM_024188
95470_at	PAK1 interacting protein 1	Pak1ip1	NM_026550
99662_at	pericentrin 1	Pcnt1	NM_001002929
99663_g_at	pericentrin 1	Pcnt1	NM_001002929
100977_at	pyruvate dehydrogenase kinase, isoenzyme 1	Pdk1	NM_172665
160788_at	pescadillo homolog 1, containing BRCT domain (zebrafish)	Pes1	NM_022889
104491_at	putative homeodomain transcription factor 2	Phtf2	NM_172992
161292_f_at	polo-like kinase 1 (Drosophila)	Plk1	NM_011121
93099_f_at	polo-like kinase 1 (Drosophila)	Plk1	NM_011121
93360_at	phosphomannomutase 1	Pmm1	NM_013872
98006_at	polymerase (DNA directed), alpha 2	Pola2	NM_008893
103057_at	polymerase (DNA directed), delta 1, catalytic subunit	Pold1	NM_011131
100408_at	polymerase (DNA directed), epsilon 3 (p17 subunit)	Pole3	NM_021498
94915_at	peptidylprolyl isomerase B	Ppib	NM_011149
95032_at	protein regulator of cytokinesis 1	Prc1	NM_145150
93495_at	peroxiredoxin 4	Prdx4	NM_016764
96772_at	DNA primase, p49 subunit	Prim1	NM_008921
93389_at	prominin 1	Prom1	NM_008935
93390_g_at	prominin 1	Prom1	NM_008935
94924_at	proline-rich Gla (G-carboxyglutamic acid) polypeptide 2	Prrg2	NM_022999
96295_at	phosphoserine aminotransferase 1	Psat1	NM_177420
95742_at	proteasome (prosome, macropain) 26S subunit, non-ATPase, 13	Psmd13	NM_011875
104422_at	protein tyrosine phosphatase, receptor type, N	Ptprn	NM_008985
96603_at	quiescin Q6	Qscn6	NM_023268
94953_at	Rac GTPase-activating protein 1	Racgap1	NM_012025
102821_s_at	RAN, member RAS oncogene family /// RAS-like, family 2, locus 9	Ran /// Rasl2-9	NM_009028 /// NM_009391
93319_at	RAS p21 protein activator 3	Rasa3	NM_009025
98335_at	replication factor C 1	Recc1	NM_011258
160759_at	replication factor C (activator 1) 2	Rfc2	NM_020022
94024_at	retroviral integration site 2	Ris2	NM_026014
101421_at	ring finger protein 5	Rnf5	NM_019403
99198_at	ribosomal protein L32	Rpl32	NM_172086
160426_at	RNA polymerase 1-1	Rpo1-1	NM_009085
95544_at	RUN and SH3 domain containing 1	Rusc1	NM_028188
95758_at	stearoyl-Coenzyme A desaturase 2	Scd2	NM_009128
103953_at	SEC22 vesicle trafficking protein-like 1 (S. cerevisiae)	Sec22l1	NM_011342
98944_at	SEC23B (S. cerevisiae)	Sec23b	NM_019787
93548_at	Sec61 beta subunit	Sec61b	NM_024171
92870_at	Sel1 (suppressor of lin-12) 1 homolog (C. elegans)	Sel1h	NM_011344
98550_at	SET translocation	Set	NM_023871
92757_at	seizure related gene 6	Sez6	NM_021286
95456_r_at	split hand/foot deleted gene 1	Shfdg1	NM_009169
99111_at	suppressor of K+ transport defect 3	Skd3	NM_009191
94419_at	solute carrier family 19 (sodium/hydrogen exchanger), member 1	Slc19a1	NM_031196
92950_at	solute carrier family 29 (nucleoside transporters), member 2	Slc29a2	NM_007854
103357_at	solute carrier family 2 (facilitated glucose transporter), member 2	Slc2a2	NM_031197
97430_at	solute carrier family 37 (glycerol-6-phosphate transporter), member 4	Slc37a4	NM_008063
161036_at	solute carrier family 6 (neurotransmitter transporter), member 15	Slc6a15	NM_175328
101906_at	SMC4 structural maintenance of chromosomes 4-like 1 (yeast)	Smc4l1	NM_133786
96712_at	SPARC related modular calcium binding 1	Smoc1	NM_022316
160630_at	spermine synthase	Sms	NM_009214
96682_at	ST6 (alpha-N-acetyl-neuraminyl-2,3-beta-galactosyl-1,3)-N-acetylgalactosaminide alpha-2,6-sialyltransferase 4	St6galnac4	NM_011373
97909_at	stathmin 1	Stmn1	NM_019641
160635_at	syntaxin 18	Stx18	NM_026959
97983_s_at	syntaxin binding protein 1	Stxbp1	NM_009295
102116_f_at	synaptotagmin 3	Syt3	NM_016663
97238_at	transforming, acidic coiled-coil containing protein 3	Tacc3	NM_011524
96737_at	TBC1 domain family, member 22a	Tbc1d22a	NM_145476
98937_at	transforming growth factor beta regulated gene 1	Tbrg1	NM_025289
102315_at	testis expressed gene 292	Tex292	NM_011574
94015_at	TH1-like homolog (Drosophila)	Th1l	NM_020580
96760_at	translocase of inner mitochondrial membrane 10 homolog (yeast)	Timm10	NM_013896
96668_at	translocator of inner mitochondrial membrane 17b	Timm17b	NM_011591
96849_at	translocase of inner mitochondrial membrane 8 homolog a (yeast)	Timm8a	NM_013898
103974_at	transmembrane protease, serine 2	Tmprss2	NM_015775
99129_at	tumor necrosis factor superfamily, member 5-induced protein 1	Tnfsf5ip1	NM_134138
99578_at	topoisomerase (DNA) II alpha	Top2a	NM_011623
103071_at	topoisomerase (DNA) II beta binding protein	Topbp1	NM_176979
160376_at	tumor protein p53 inducible nuclear protein 2	Trp53inp2	NM_178111
97953_g_at	tuberous sclerosis 2	Tsc2	NM_011647
103201_at	Ttk protein kinase	Ttk	NM_009445
100343_f_at	tubulin, alpha 1	Tuba1	NM_011653
98759_f_at	tubulin, alpha 1 /// tubulin, alpha 2 /// tubulin, alpha 6	Tuba1 /// Tuba2 /// Tuba6	NM_009448 /// NM_011653 /// NM_011654
101543_f_at	tubulin, alpha 6	Tuba6	NM_009448
94788_f_at	tubulin, beta 5	Tubb5	NM_011655
104164_at	trypsin domain containing 1	Tysnd1	XM_125636
160165_at	ubiquitin-conjugating enzyme E2M (UBC12 homolog, yeast)	Ube2m	NM_145578
94274_at	ubiquitin-conjugating enzyme E2S	Ube2s	NM_133777
93966_at	ubiquitination factor E4B, UFD2 homolog (S. cerevisiae)	Ube4b	NM_022022
160856_at	ubiquitin-like 4	Ubl4	NM_145405
99564_at	ubiquitin-like, containing PHD and RING finger domains, 1	Uhrf1	NM_010931
102792_at	uracil-DNA glycosylase	Ung	NM_011677
97894_at	valyl-tRNA synthetase 2	Vars2	NM_011690
96847_at	vacuolar protein sorting 28 (yeast)	Vps28	NM_025842
98549_at	vitronectin	Vtn	NM_011707
100522_s_at	WW domain binding protein 5	Wbp5	NM_011712
95643_at	WD repeat domain 6	Wdr6	NM_031392
94228_at	exportin 1, CRM1 homolog (yeast)	Xpo1	NM_134014
104105_at	exportin 6	Xpo6	NM_028816
92202_g_at	zinc finger and BTB domain containing 16	Zbtb16	XM_134826
96794_at	zinc finger protein 622	Zfp622	NM_144523
99147_at	zinc finger, HIT domain containing 1	Znhit1	NM_027318

## Sheet: Table 2_21 days
Supplementary Table 2: 2,532 Probe-sets significant in 21 days
Probe Set ID	Gene Title	Gene Symbol	RefSeq Transcript ID
100154_at	---	---	---
100344_at	---	---	---
100616_at	---	---	---
100617_at	---	---	---
100681_f_at	---	---	---
100910_at	---	---	---
101036_at	---	---	---
101217_at	---	---	---
101220_at	---	---	---
101348_at	---	---	---
101430_at	---	---	---
101500_at	---	---	---
101508_at	---	---	---
101526_at	---	---	---
101568_at	---	---	---
101782_at	---	---	---
101783_i_at	---	---	---
101913_at	---	---	---
101958_f_at	---	---	---
101959_r_at	---	---	---
101982_at	---	---	---
102090_f_at	---	---	---
102095_f_at	---	---	---
102110_at	---	---	---
102137_f_at	---	---	---
102158_at	---	---	---
102193_at	---	---	---
102261_f_at	---	---	---
102724_at	---	---	---
102767_at	---	---	---
103070_at	---	---	---
103362_at	---	---	---
103481_at	---	---	---
103530_at	---	---	---
103630_at	---	---	---
103635_at	---	---	---
104019_at	---	---	---
104030_at	Transcribed locus	---	---
104175_at	---	---	---
104298_at	---	---	---
104367_at	---	---	---
104414_at	---	---	---
104709_at	---	---	---
160063_i_at	---	---	---
160113_at	---	---	---
160124_r_at	---	---	---
160127_at	---	---	---
160198_at	---	---	---
160272_at	---	---	---
160273_at	Brf2 gene, 3' UTR	---	---
160450_at	---	---	---
160563_at	CDNA, clone:Y0G0116J03, strand:plus, reference:ENSEMBL:Mouse-Transcript-ENST:ENSMUST00000067823, based on BLAT search	---	---
160642_at	---	---	---
160685_at	---	---	---
160745_at	---	---	---
160837_at	---	---	---
161085_r_at	---	---	---
161124_at	---	---	---
161147_f_at	---	---	---
161193_r_at	---	---	---
161227_r_at	---	---	---
161246_at	---	---	---
161271_r_at	---	---	---
161310_at	---	---	---
161316_f_at	---	---	---
161428_at	---	---	---
161441_f_at	---	---	---
161485_r_at	---	---	---
161519_f_at	---	---	---
161535_at	---	---	---
161543_at	---	---	---
161626_f_at	---	---	---
161683_r_at	---	---	---
161844_at	---	---	---
161865_r_at	---	---	---
161912_r_at	---	---	---
161929_at	---	---	---
161948_f_at	---	---	---
162002_r_at	---	---	---
162020_at	---	---	---
162027_f_at	---	---	---
162047_f_at	---	---	---
162081_f_at	---	---	---
162104_f_at	---	---	---
162132_f_at	---	---	---
162159_i_at	---	---	---
162229_at	Transcribed locus, strongly similar to XP_343804.1 ribosomal protein S4, X-linked [Rattus norvegicus]	---	---
162318_r_at	---	---	---
162379_r_at	---	---	---
162397_r_at	---	---	---
162403_at	---	---	---
162433_f_at	---	---	---
162501_at	---	---	---
92268_at	---	---	---
92330_r_at	---	---	---
92338_f_at	Adult male olfactory brain cDNA, RIKEN full-length enriched library, clone:6430503O15 product:MSZF33 (FRAGMENT) homolog [Mus musculus], full insert sequence	---	---
92834_at	---	---	---
92871_at	---	---	---
92945_at	---	---	---
93153_at	---	---	---
93539_at	---	---	---
93932_at	---	---	---
93965_r_at	---	---	---
94012_at	---	---	---
94027_at	CDNA clone IMAGE:30033444, partial cds	---	---
94295_at	---	---	---
94962_g_at	---	---	---
95505_at	---	---	---
95514_at	---	---	---
95629_at	---	---	---
95634_at	---	---	---
96096_f_at	---	---	---
96192_at	---	---	---
96252_at	---	---	---
96309_r_at	---	---	---
96391_at	Transcribed locus, moderately similar to XP_328828.1 Neurospora crassa NCU08122.1 gene	---	---
96530_at	Transcribed locus	---	---
96578_r_at	---	---	---
96756_at	---	---	---
97120_at	---	---	---
97262_at	---	---	---
97351_i_at	---	---	---
97688_at	16 days neonate thymus cDNA, RIKEN full-length enriched library, clone:A130082C12 product:unknown EST, full insert sequence	---	---
97951_s_at	---	---	---
97988_at	---	---	---
98086_r_at	Transcribed locus, strongly similar to XP_344538.1 similar to 40S ribosomal protein S28 [Rattus norvegicus]	---	---
98358_at	---	---	---
98528_at	---	---	---
98530_at	---	---	---
98602_at	---	---	---
98605_at	---	---	---
98886_at	---	---	---
98892_at	---	---	---
98943_at	---	---	---
98965_at	---	---	---
99559_at	---	---	---
99756_at	---	---	---
99819_at	---	---	---
95677_at	RIKEN cDNA 0610009C03 gene	0610009C03Rik	NM_025645
95635_g_at	RIKEN cDNA 0610010K14 gene	0610010K14Rik	NM_026757
95636_at	RIKEN cDNA 0610010K14 gene	0610010K14Rik	NM_026757
97242_at	RIKEN cDNA 0610010O12 gene	0610010O12Rik	XM_488847
94047_at	RIKEN cDNA 0610031J06 gene	0610031J06Rik	NM_020003
103760_at	RIKEN cDNA 0610039J04 gene	0610039J04Rik	NM_025615
99616_s_at	RIKEN cDNA 0610040D20 gene	0610040D20Rik	NM_023153
104537_at	RIKEN cDNA 0610042C05 gene	0610042C05Rik	NM_025343
160338_at	RIKEN cDNA 1100001D10 gene	1100001D10Rik	---
95458_s_at	RIKEN cDNA 1110001C20 gene	1110001C20Rik	NM_177730
96731_at	RIKEN cDNA 1110001P04 gene	1110001P04Rik	---
95411_at	RIKEN cDNA 1110004F10 gene	1110004F10Rik	NM_019772
160333_at	RIKEN cDNA 1110008F13 gene	1110008F13Rik	NM_026124
96709_at	RIKEN cDNA 1110008P14 gene	1110008P14Rik	NM_198001
95760_at	RIKEN cDNA 1110011K10 gene	1110011K10Rik	NM_170777
103881_at	RIKEN cDNA 1110013G13 gene	1110013G13Rik	NM_146141
93336_at	RIKEN cDNA 1110014C03 gene	1110014C03Rik	NM_026775
160382_at	RIKEN cDNA 1110014J01 gene	1110014J01Rik	NM_029101
97305_at	RIKEN cDNA 1110017C15 gene	1110017C15Rik	NM_025391
95409_at	RIKEN cDNA 1110019J04 gene	1110019J04Rik	XM_149430
95592_at	RIKEN cDNA 1110019N10 gene	1110019N10Rik	NM_026753
97919_at	RIKEN cDNA 1110021E09 gene	1110021E09Rik	NM_025845
97807_at	RIKEN cDNA 1110021H02 gene	1110021H02Rik	NM_025388
104573_at	RIKEN cDNA 1110025L05 gene	1110025L05Rik	NM_175103
95690_at	RIKEN cDNA 1110030L07 gene	1110030L07Rik	NM_178614
104314_r_at	RIKEN cDNA 1110032A03 gene	1110032A03Rik	NM_023483
96604_at	RIKEN cDNA 1110032N12 gene	1110032N12Rik	NM_026824
99078_at	RIKEN cDNA 1110033C18 gene	1110033C18Rik	NM_133964
98149_s_at	RIKEN cDNA 1110033J19 gene	1110033J19Rik	NM_025405
101440_at	RIKEN cDNA 1110033L15 gene	1110033L15Rik	---
104077_at	RIKEN cDNA 1110049G11 gene	1110049G11Rik	NM_025410
94400_at	RIKEN cDNA 1110051M20 gene	1110051M20Rik	NM_175123
92941_at	RIKEN cDNA 1110054M08 gene	1110054M08Rik	---
160387_at	RIKEN cDNA 1110055L24 gene	1110055L24Rik	NM_025422
96121_at	RIKEN cDNA 1110055N21 gene	1110055N21Rik	NM_176843
103260_at	RIKEN cDNA 1110060D06 gene	1110060D06Rik	---
96621_at	RIKEN cDNA 1110061L23 gene	1110061L23Rik	NM_029406
103771_at	RIKEN cDNA 1110061N23 gene	1110061N23Rik	NM_176834
162360_f_at	RIKEN cDNA 1110061O04 gene	1110061O04Rik	NM_026849
161909_r_at	RIKEN cDNA 1110062M06 gene	1110062M06Rik	---
96288_at	RIKEN cDNA 1190002C06 gene	1190002C06Rik	NM_028447
160359_at	RIKEN cDNA 1190002H23 gene	1190002H23Rik	NM_025427
92817_at	RIKEN cDNA 1190002L16 gene	1190002L16Rik	NM_133976
98458_at	RIKEN cDNA 1190007F08 gene	1190007F08Rik	XM_489067
98461_at	RIKEN cDNA 1200014P03 gene	1200014P03Rik	NM_029091
95737_at	RIKEN cDNA 1200015A19 gene	1200015A19Rik	NM_026388
95078_at	RIKEN cDNA 1200015F23 gene	1200015F23Rik	XM_203936
99849_at	RIKEN cDNA 1200016E24 gene	1200016E24Rik	XM_489305
93760_at	RIKEN cDNA 1200020A08 gene	1200020A08Rik	NM_019936
93975_at	RIKEN cDNA 1300002F13 gene	1300002F13Rik	NM_133753
97401_at	RIKEN cDNA 1300006C06 gene	1300006C06Rik	NM_028792
103409_at	RIKEN cDNA 1300006M19 gene	1300006M19Rik	NM_025833
104044_at	RIKEN cDNA 1300006N24 gene	1300006N24Rik	NM_027911
104398_at	RIKEN cDNA 1300010A20 gene	1300010A20Rik	NM_146173
103531_f_at	RIKEN cDNA 1300013B24 gene	1300013B24Rik	NM_026184
97098_at	RIKEN cDNA 1300017K07 gene	1300017K07Rik	NM_027919
160260_at	RIKEN cDNA 1500006O09 gene	1500006O09Rik	NM_025435
160787_at	RIKEN cDNA 1500010J02 gene	1500010J02Rik	XM_488515
160749_at	RIKEN cDNA 1500011H22 gene	1500011H22Rik	NM_026883
93533_at	RIKEN cDNA 1500011L16 gene	1500011L16Rik	NM_026899
98938_at	RIKEN cDNA 1500026D16 gene	1500026D16Rik	NM_026616
97874_at	RIKEN cDNA 1500032D16 gene	1500032D16Rik	NM_030087
97271_at	RIKEN cDNA 1500034E06 gene	1500034E06Rik	NM_030083
102071_at	RIKEN cDNA 1500034J01 gene	1500034J01Rik	XM_356085
161719_f_at	RIKEN cDNA 1500034J01 gene	1500034J01Rik	XM_356085
97404_at	RIKEN cDNA 1500034J01 gene	1500034J01Rik	XM_356085
93844_at	RIKEN cDNA 1500040F11 gene	1500040F11Rik	NM_025352
97107_at	RIKEN cDNA 1700007D05 gene	1700007D05Rik	NM_028832
98890_at	RIKEN cDNA 1700012G19 gene	1700012G19Rik	NM_025954
104726_at	RIKEN cDNA 1700013L23 gene	1700013L23Rik	NM_027062
162220_r_at	RIKEN cDNA 1700014P03 gene	1700014P03Rik	NM_153527
104389_at	RIKEN cDNA 1700017B05 gene	1700017B05Rik	XM_134943
104593_at	RIKEN cDNA 1700023O11 gene	1700023O11Rik	NM_029339
95619_at	RIKEN cDNA 1700040I03 gene	1700040I03Rik	XM_132652
104670_at	RIKEN cDNA 1700065A05 gene	1700065A05Rik	XM_283972
104250_at	Leucine rich repeat containing 8	1700084E18Rik	---
161380_f_at	RIKEN cDNA 1700093E07 gene	1700093E07Rik	NM_133685
97237_at	RIKEN cDNA 1810003N24 gene	1810003N24Rik	NM_025443
97356_at	RIKEN cDNA 1810008O21 gene	1810008O21Rik	NM_026938
103565_at	RIKEN cDNA 1810009A15 gene	1810009A15Rik	NM_025463
104041_at	RIKEN cDNA 1810009A16 gene	1810009A16Rik	XM_355528
92712_at	RIKEN cDNA 1810009J06 gene	1810009J06Rik	NM_023707
97885_at	RIKEN cDNA 1810009M01 gene	1810009M01Rik	NM_023056
160145_at	RIKEN cDNA 1810010M01 gene	1810010M01Rik	NM_026918
160486_at	RIKEN cDNA 1810010N17 gene	1810010N17Rik	NM_025455
95137_at	RIKEN cDNA 1810014L12 gene	1810014L12Rik	NM_133706
96713_at	RIKEN cDNA 1810018P12 gene	1810018P12Rik	---
99154_s_at	RIKEN cDNA 1810020D17 gene	1810020D17Rik	NM_183251
94508_at	RIKEN cDNA 1810020E01 gene	1810020E01Rik	NM_025460
103540_at	RIKEN cDNA 1810021B22 gene	1810021B22Rik	---
97775_at	Expressed sequence AA511254	1810021J13Rik	NM_025464
161169_f_at	RIKEN cDNA 1810030O07 gene	1810030O07Rik	NM_175141
96219_at	RIKEN cDNA 1810031K02 gene	1810031K02Rik	NM_133716
95406_at	RIKEN cDNA 1810037I17 gene	1810037I17Rik	NM_024461
94543_at	RIKEN cDNA 1810042K04 gene	1810042K04Rik	NM_025604
160983_at	RIKEN cDNA 1810044D09 gene	1810044D09Rik	---
96878_at	RIKEN cDNA 1810044O22 gene	1810044O22Rik	NM_025558
94453_at	RIKEN cDNA 1810046J19 gene	1810046J19Rik	NM_025559
160178_r_at	RIKEN cDNA 1810056O20 gene	1810056O20Rik	NM_175277
97514_at	RIKEN cDNA 1810063B05 gene	1810063B05Rik	NM_174987
160414_at	RIKEN cDNA 1810073N04 gene	1810073N04Rik	NM_024249
95952_at	RIKEN cDNA 1810073P09 gene	1810073P09Rik	XM_127323
95105_at	RIKEN cDNA 2010110M21 gene	2010110M21Rik	NM_025933
160955_at	RIKEN cDNA 2010309E21 gene	2010309E21Rik	NM_025591
103567_at	RIKEN cDNA 2010313D22 gene	2010313D22Rik	---
99188_at	RIKEN cDNA 2010315L10 gene	2010315L10Rik	NM_025917 /// NM_029768
96045_at	RIKEN cDNA 2010321M09 gene	2010321M09Rik	NM_175153
160702_at	RIKEN cDNA 2210008M09 gene	2210008M09Rik	NM_194055
100103_f_at	RIKEN cDNA 2210010C04 gene	2210010C04Rik	NM_023333
100104_r_at	RIKEN cDNA 2210010C04 gene	2210010C04Rik	NM_023333
92622_at	RIKEN cDNA 2210013K02 gene	2210013K02Rik	NM_023712
103601_at	RIKEN cDNA 2210013M04 gene	2210013M04Rik	NM_178595
161019_at	RIKEN cDNA 2210018M03 gene	2210018M03Rik	XM_355849
103560_at	RIKEN cDNA 2210402C18 gene	2210402C18Rik	NM_027309
160217_at	RIKEN cDNA 2310001A20 gene	2310001A20Rik	NM_027977
104334_at	RIKEN cDNA 2310004I24 gene	2310004I24Rik	NM_025510
160434_at	RIKEN cDNA 2310004K06 gene	2310004K06Rik	NM_020050
99157_at	RIKEN cDNA 2310004N24 gene	2310004N24Rik	XM_181318
103873_i_at	RIKEN cDNA 2310015N07 gene	2310015N07Rik	NM_025515
96122_at	RIKEN cDNA 2310016A09 gene	2310016A09Rik	NM_181588
97371_at	RIKEN cDNA 2310022K01 gene	2310022K01Rik	XM_355883
96261_at	RIKEN cDNA 2310028O11 gene	2310028O11Rik	---
98941_r_at	RIKEN cDNA 2310032D16 gene	2310032D16Rik	NM_027096 /// NM_028802
104320_at	RIKEN cDNA 2310036D04 gene	2310036D04Rik	XM_488563 /// XM_489917
95086_at	RIKEN cDNA 2310036O22 gene	2310036O22Rik	NM_026760
104117_at	RIKEN cDNA 2310040A13 gene	2310040A13Rik	---
96320_at	RIKEN cDNA 2310044H10 gene	2310044H10Rik	NM_197991
160067_at	RIKEN cDNA 2310057D15 gene	2310057D15Rik	NM_026421
162213_i_at	RIKEN cDNA 2310061B02 gene	2310061B02Rik	NM_027154
95520_at	RIKEN cDNA 2310061B02 gene	2310061B02Rik	NM_027154
160858_at	RIKEN cDNA 2310061C15 gene	2310061C15Rik	NM_026844
96212_at	RIKEN cDNA 2310061I04 gene	2310061I04Rik	XM_128627
101404_at	RIKEN cDNA 2310061I09 gene	2310061I09Rik	NM_027159
96271_at	RIKEN cDNA 2310075C12 gene	2310075C12Rik	NM_133739
96352_at	RIKEN cDNA 2400001E08 gene	2400001E08Rik	NM_025605
98069_s_at	RIKEN cDNA 2400003N08 gene	2400003N08Rik	NM_178622
102421_at	RIKEN cDNA 2400010G15 gene	2400010G15Rik	NM_029624
95090_at	RIKEN cDNA 2410001H17 gene	2410001H17Rik	NM_025889
160727_at	RIKEN cDNA 2410002F23 gene	2410002F23Rik	NM_025880
160283_at	RIKEN cDNA 2410005K20 gene	2410005K20Rik	NM_025546
162003_at	RIKEN cDNA 2410005K20 gene	2410005K20Rik	NM_025546
97256_at	RIKEN cDNA 2410011G03 gene	2410011G03Rik	NM_025551
100912_at	RIKEN cDNA 2410012M04 gene	2410012M04Rik	NM_027193
160716_at	RIKEN cDNA 2410018C17 gene	2410018C17Rik	NM_178390
102120_f_at	RIKEN cDNA 2410018L13 gene	2410018L13Rik	NM_028362
96780_at	RIKEN cDNA 2410022L05 gene	2410022L05Rik	NM_025556
100917_at	RIKEN cDNA 2410080P20 gene	2410080P20Rik	NM_026464
101971_at	RIKEN cDNA 2500002L14 gene	2500002L14Rik	NM_025607
96885_at	RIKEN cDNA 2510015F01 gene	2510015F01Rik	XM_354801
96325_at	RIKEN cDNA 2510039O18 gene	2510039O18Rik	NM_029841
97866_at	RIKEN cDNA 2510049I19 gene	2510049I19Rik	NM_026455
160845_at	RIKEN cDNA 2600001J17 gene	2600001J17Rik	NM_027411
93591_at	RIKEN cDNA 2600002E23 gene	2600002E23Rik	NM_026441
93130_at	RIKEN cDNA 2600005C20 gene	2600005C20Rik	NM_028244
103010_at	RIKEN cDNA 2610005L07 gene	2610005L07Rik	XM_486359
97252_at	RIKEN cDNA 2610012O22 gene	2610012O22Rik	NM_023536
98097_r_at	RIKEN cDNA 2610019N19 gene	2610019N19Rik	---
160521_at	RIKEN cDNA 2610020N02 gene	2610020N02Rik	NM_181470
101053_at	RIKEN cDNA 2610031L17 gene	2610031L17Rik	NM_133701
93568_i_at	RIKEN cDNA 2610042L04 gene	2610042L04Rik	NM_025940
93569_f_at	RIKEN cDNA 2610042L04 gene	2610042L04Rik	NM_025940
103312_f_at	RIKEN cDNA 2610101J03 gene	2610101J03Rik	XM_130548
104229_at	RIKEN cDNA 2610200G18 gene	2610200G18Rik	NM_025998
162249_f_at	RIKEN cDNA 2610200G18 gene	2610200G18Rik	NM_025998
95927_f_at	RIKEN cDNA 2610201A13 gene	2610201A13Rik	---
102368_at	RIKEN cDNA 2610208E05 gene	2610208E05Rik	NM_175364
103726_at	RIKEN cDNA 2610311I19 gene	2610311I19Rik	NM_023311
98538_at	RIKEN cDNA 2610507B11 gene	2610507B11Rik	NM_001002004
102011_at	RIKEN cDNA 2610507L03 gene	2610507L03Rik	NM_028120
160223_at	RIKEN cDNA 2610511O17 gene	2610511O17Rik	NM_152817
93774_at	RIKEN cDNA 2610524G07 gene	2610524G07Rik	NM_025596
96817_at	RIKEN cDNA 2700067D09 gene	2700067D09Rik	NM_028301
104403_at	RIKEN cDNA 2700078E11 gene	2700078E11Rik	NM_030197
162467_r_at	RIKEN cDNA 2700078K21 gene	2700078K21Rik	NM_028308
100955_at	RIKEN cDNA 2700084L22 gene	2700084L22Rik	NM_026024
96016_at	RIKEN cDNA 2700094K13 gene	2700094K13Rik	---
102942_at	RIKEN cDNA 2810012G08 gene	2810012G08Rik	---
97374_at	RIKEN cDNA 2810025M15 gene	2810025M15Rik	NM_027274
104423_at	RIKEN cDNA 2810047L02 gene	2810047L02Rik	NM_029766
95150_at	RIKEN cDNA 2810052M02 gene	2810052M02Rik	NM_023320
94759_at	RIKEN cDNA 2810402A17 gene	2810402A17Rik	XM_489366
97434_at	RIKEN cDNA 2810405F18 gene	2810405F18Rik	NM_028142
95451_at	RIKEN cDNA 2810405J04 gene	2810405J04Rik	NM_133747
97292_at	RIKEN cDNA 2810407C02 gene	2810407C02Rik	XM_283848
92191_at	RIKEN cDNA 2810410A08 gene	2810410A08Rik	XM_130324
100116_at	RIKEN cDNA 2810417H13 gene	2810417H13Rik	NM_026515
160400_at	RIKEN cDNA 2810422B04 gene	2810422B04Rik	NM_027275
160278_at	RIKEN cDNA 2810428I15 gene	2810428I15Rik	NM_025577
101505_at	RIKEN cDNA 2810442O16 gene	2810442O16Rik	NM_024196
103664_r_at	RIKEN cDNA 2810452K22 gene	2810452K22Rik	NM_026048
104393_at	RIKEN cDNA 2810453I06 gene	2810453I06Rik	NM_026050 /// NM_133703
92708_at	DEAD (Asp-Glu-Ala-Asp) box polypeptide 19b	2810457M08Rik	NM_172284
101856_at	RIKEN cDNA 2900008M13 gene	2900008M13Rik	XM_110121
96658_at	RIKEN cDNA 2900010J23 gene	2900010J23Rik	NM_175190
95707_at	RIKEN cDNA 2900010M23 gene	2900010M23Rik	NM_026063
98476_at	RIKEN cDNA 2900054D09 gene	2900054D09Rik	---
97543_at	septin 2	2-Sep	NM_010891
94011_at	RIKEN cDNA 3100004P22 gene	3100004P22Rik	NM_133693
160706_at	RIKEN cDNA 3110004L20 gene	3110004L20Rik	XM_127295
97462_at	RIKEN cDNA 3110006P09 gene	3110006P09Rik	NM_026521
97463_g_at	RIKEN cDNA 3110006P09 gene	3110006P09Rik	NM_026521
94260_at	RIKEN cDNA 3110040D16 gene	3110040D16Rik	XM_126172
98029_at	RIKEN cDNA 3110056O03 gene	3110056O03Rik	NM_175195
98493_at	RIKEN cDNA 3200002M19 gene	3200002M19Rik	NM_027532
97412_at	RIKEN cDNA 3300001G02 gene	3300001G02Rik	NM_030093
97935_at	RIKEN cDNA 4121402D02 gene	4121402D02Rik	NM_028722
102343_at	hypothetical protein 425O18-1	425O18-1	NM_019421
93437_f_at	RIKEN cDNA 4632419I22 gene	4632419I22Rik	NM_175205
97097_at	RIKEN cDNA 4732465J09 gene	4732465J09Rik	XM_356161
96165_at	RIKEN cDNA 4732477C12 gene	4732477C12Rik	---
95445_at	RIKEN cDNA 4833439L19 gene	4833439L19Rik	NM_133797
102233_at	RIKEN cDNA 4833442J19 gene	4833442J19Rik	NM_177101
100547_at	RIKEN cDNA 4921506I22 gene	4921506I22Rik	NM_025717
160982_at	RIKEN cDNA 4921526G09 gene	4921526G09Rik	NM_025729
160994_at	RIKEN cDNA 4930429A08 gene	4930429A08Rik	XM_131689
94243_at	RIKEN cDNA 4930432B04 gene	4930432B04Rik	XM_130287
103663_at	RIKEN cDNA 4930467B06 gene	4930467B06Rik	NM_026651 /// NM_029786
104639_i_at	RIKEN cDNA 4930553M18 gene	4930553M18Rik	NM_026541 /// NM_029248
93440_at	RIKEN cDNA 4930564D15 gene	4930564D15Rik	---
95444_at	RIKEN cDNA 4930579A11 gene	4930579A11Rik	NM_029478
96089_at	RIKEN cDNA 4931406C07 gene	4931406C07Rik	NM_133732
99827_at	RIKEN cDNA 4933403M19 gene	4933403M19Rik	---
103716_at	RIKEN cDNA 4933409L06 gene	4933409L06Rik	XM_129509
102895_at	RIKEN cDNA 4933421G18 gene	4933421G18Rik	NM_027707 /// NM_201232
104038_at	RIKEN cDNA 4933434E20 gene	4933434E20Rik	NM_025762 /// NM_027500
103221_at	RIKEN cDNA 5031425D22 gene	5031425D22Rik	---
98495_at	RIKEN cDNA 5033414D02 gene	5033414D02Rik	NM_026362
97324_at	RIKEN cDNA 5133401N09 gene	5133401N09Rik	NM_198004
103343_at	RIKEN cDNA 5430432M24 gene	5430432M24Rik	NM_028666 /// NM_146127
102912_at	RIKEN cDNA 5430432P15 gene	5430432P15Rik	XM_129246
94955_at	RIKEN cDNA 5530600A18 gene	5530600A18Rik	NM_027799
103863_at	RIKEN cDNA 5630401J11 gene	5630401J11Rik	NM_134114
160922_at	RIKEN cDNA 5730405M13 gene	5730405M13Rik	NM_025671
103557_at	RIKEN cDNA 5730409F24 gene	5730409F24Rik	NM_181403
161005_at	RIKEN cDNA 5730420B22 gene	5730420B22Rik	NM_172597
97308_at	RIKEN cDNA 5730466P16 gene	5730466P16Rik	NM_173453
93244_at	RIKEN cDNA 5730502D15 gene	5730502D15Rik	NM_026485
104586_at	RIKEN cDNA 5730507C05 gene	5730507C05Rik	---
104515_at	RIKEN cDNA 5730508B09 gene	5730508B09Rik	NM_027482
160686_at	RIKEN cDNA 5730555F13 gene	5730555F13Rik	NM_025690
160119_at	RIKEN cDNA 5730592L21 gene	5730592L21Rik	NM_029720
103223_at	RIKEN cDNA 5830406C15 gene	5830406C15Rik	---
95655_at	RIKEN cDNA 5830411E10 gene	5830411E10Rik	NM_028696
94951_at	RIKEN cDNA 5830482G23 gene	5830482G23Rik	---
100290_f_at	RIKEN cDNA 6230416J20 gene	6230416J20Rik	NM_173400
162260_at	RIKEN cDNA 6330407G11 gene	6330407G11Rik	NM_023423
103424_at	RIKEN cDNA 6330442E10 gene	6330442E10Rik	NM_178745
104207_at	RIKEN cDNA 6330505N24 gene	6330505N24Rik	XM_130991
161114_i_at	RIKEN cDNA 6330509M23 gene	6330509M23Rik	---
95530_at	RIKEN cDNA 6330549H03 gene	6330549H03Rik	---
95904_at	RIKEN cDNA 6430543G08 gene	6430543G08Rik	---
160682_at	RIKEN cDNA 6430706D22 gene	6430706D22Rik	NM_198652
95523_at	RIKEN cDNA 6530401D17 gene	6530401D17Rik	NM_029541 /// NM_029823
101607_at	RIKEN cDNA 6720425G15 gene	6720425G15Rik	XM_203601
97311_at	RIKEN cDNA 6720456B07 gene	6720456B07Rik	NM_133937
94211_at	RIKEN cDNA 6720460F02 gene	6720460F02Rik	NM_144526
101929_at	RIKEN cDNA 6720463E02 gene	6720463E02Rik	NM_026556
160103_at	membrane-associated ring finger (C3HC4) 7	7-Mar	NM_020575
93158_at	RIKEN cDNA 9130206N08 gene	9130206N08Rik	XM_125729
161885_f_at	RIKEN cDNA 9130427A09 gene	9130427A09Rik	NM_026240
93484_at	RIKEN cDNA 9130427A09 gene	9130427A09Rik	NM_026240
95021_at	RIKEN cDNA 9430010O03 gene	9430010O03Rik	NM_176849
161104_at	RIKEN cDNA 9430099J10 gene	9430099J10Rik	---
99624_at	RIKEN cDNA 9530068E07 gene	9530068E07Rik	NM_153117
160789_at	RIKEN cDNA 9530090G24 gene	9530090G24Rik	NM_145537
94995_at	RIKEN cDNA A030007L17 gene	A030007L17Rik	NM_026637
102695_at	RIKEN cDNA A130095M15 gene	A130095M15Rik	---
97118_at	RIKEN cDNA A630007B06 gene	A630007B06Rik	NM_170757
96545_s_at	RIKEN cDNA A730042J05 gene	A730042J05Rik	NM_178708
96546_r_at	RIKEN cDNA A730042J05 gene	A730042J05Rik	NM_178708
160313_at	RIKEN cDNA A730098D12 gene	A730098D12Rik	XM_485639
103688_at	RIKEN cDNA A830006N08 gene	A830006N08Rik	NM_183173
160974_at	expressed sequence AA408556	AA408556	NM_199447
160163_at	expressed sequence AA415817	AA415817	NM_053181 /// NM_178853
97918_at	expressed sequence AA536743	AA536743	NM_145923
94899_at	expressed sequence AA536749	AA536749	NM_012027 /// NM_201245
94486_at	expressed sequence AA959742	AA959742	NM_133807
160968_at	alanine and arginine rich domain containing protein	Aard	NM_175503
94918_at	alanyl-tRNA synthetase	Aars	NM_146217
103389_at	aminoadipate-semialdehyde synthase	Aass	NM_013930
94354_at	ATP-binding cassette, sub-family A (ABC1), member 1	Abca1	NM_013454
104289_at	ATP-binding cassette, sub-family B (MDR/TAP), member 8	Abcb8	NM_029020
103800_at	ATP-binding cassette, sub-family C (CFTR/MRP), member 5	Abcc5	NM_013790
103273_s_at	ATP-binding cassette, sub-family C (CFTR/MRP), member 8	Abcc8	---
97330_at	ATP-binding cassette, sub-family F (GCN20), member 1	Abcf1	NM_013854
160612_at	ATP-binding cassette, sub-family G (WHITE), member 1	Abcg1	NM_009593
93626_at	ATP-binding cassette, sub-family G (WHITE), member 2	Abcg2	NM_011920
102052_at	abhydrolase domain containing 5	Abhd5	NM_026179
101037_at	abl-interactor 1	Abi1	NM_007380
103574_at	actin-binding LIM protein 1	Ablim1	NM_178688
160303_at	acyl-Coenzyme A dehydrogenase family, member 9	Acad9	NM_172678
92581_at	acetyl-Coenzyme A dehydrogenase, medium chain	Acadm	NM_007382
99910_at	amiloride-sensitive cation channel 1, neuronal (degenerin)	Accn1	NM_007384
101515_at	acyl-Coenzyme A oxidase 1, palmitoyl	Acox1	NM_015729
98859_at	acid phosphatase 5, tartrate resistant	Acp5	NM_007388
97456_at	acyl-CoA synthetase long-chain family member 5	Acsl5	NM_027976
96573_at	actin, gamma, cytoplasmic 1	Actg1	NM_009609
100449_g_at	activin A receptor, type II-like 1	Acvrl1	NM_009612
100450_r_at	activin A receptor, type II-like 1	Acvrl1	NM_009612
101387_at	aminoacylase 1	Acy1	NM_025371
93560_at	acylphosphatase 1, erythrocyte (common) type	Acyp1	NM_025421
102832_at	a disintegrin and metalloproteinase domain 1a	Adam1a	NM_172126
162388_r_at	A disintegrin and metalloprotease domain 5	Adam5	NM_007401
104605_at	adiponectin receptor 2	Adipor2	NM_197985
93512_f_at	adenosine kinase	Adk	NM_134079
92374_at	adenosine A1 receptor	Adora1	NM_001008533 /// NM_009629
99864_at	adenosine A2b receptor	Adora2b	NM_007413
104326_at	ADP-dependent glucokinase	Adpgk	NM_028121
92340_at	adrenergic receptor, alpha 1b	Adra1b	NM_007416
98999_at	adenylosuccinate lyase	Adsl	NM_009634
99038_at	adenylosuccinate synthetase, non muscle	Adss	NM_007422
100412_g_at	AE binding protein 1	Aebp1	NM_009636
103625_at	AFG3(ATPase family gene 3)-like 1 (yeast)	Afg3l1	NM_054070
101493_at	Alpha fetoprotein	Afp	NM_007423
160807_at	1-acylglycerol-3-phosphate O-acyltransferase 3	Agpat3	NM_053014
96024_at	S-adenosylhomocysteine hydrolase	Ahcy	NM_016661
98051_at	expressed sequence AI114950	AI114950	NM_053194
95905_at	expressed sequence AI118078	AI118078	NM_172923
103299_at	expressed sequence AI132321	AI132321	NM_178911
94440_at	expressed sequence AI132487	AI132487	XM_127129
95577_at	expressed sequence AI314180	AI314180	NM_172381
160883_at	Expressed sequence AI325464	AI325464	NM_178882
97414_at	expressed sequence AI326906	AI326906	NM_153570
160636_at	expressed sequence AI413582	AI413582	NM_001002895
161857_r_at	expressed sequence AI428936	AI428936	NM_153577
160672_at	expressed sequence AI462438	AI462438	NM_133840
104034_at	expressed sequence AI464131	AI464131	XM_283952
95382_at	Expressed sequence AI646383	AI646383	---
95503_at	expressed sequence AI839562	AI839562	NM_019914
92424_at	expressed sequence AI839920	AI839920	NM_182996
95378_at	expressed sequence AI842396	AI842396	NM_213729
92744_at	Expressed sequence AI852447	AI852447	---
96801_at	adenylate kinase 1	Ak1	NM_021515
95148_at	adenylate kinase 2	Ak2	NM_016895
94390_at	A kinase (PRKA) anchor protein 8	Akap8	NM_019774
95001_at	A kinase (PRKA) anchor protein 8	Akap8	NM_019774
96888_at	aldo-keto reductase family 1, member A4 (aldehyde reductase)	Akr1a4	NM_021473
95015_at	aldo-keto reductase family 1, member C13	Akr1c13	NM_013778
92556_at	aldo-keto reductase family 1, member C6	Akr1c6	NM_030611
100970_at	thymoma viral proto-oncogene 1	Akt1	NM_009652
160558_at	thymoma viral proto-oncogene 2	Akt2	NM_007434
96260_at	expressed sequence AL033314	AL033314	NM_019776
93500_at	aminolevulinic acid synthase 1	Alas1	NM_020559
96057_at	aldehyde dehydrogenase 2, mitochondrial	Aldh2	NM_009656
96058_s_at	aldehyde dehydrogenase 2, mitochondrial	Aldh2	NM_009656
97450_s_at	aldehyde dehydrogenase family 7, member A1	Aldh7a1	NM_138600
96243_f_at	aldehyde dehydrogenase 9, subfamily A1	Aldh9a1	NM_019993
160090_f_at	aldolase 1, A isoform	Aldoa	NM_007438
103790_at	asparagine-linked glycosylation 3 homolog (yeast, alpha-1,3-mannosyltransferase)	Alg3	NM_145939
162337_f_at	Asparagine-linked glycosylation 3 homolog (yeast, alpha-1,3-mannosyltransferase)	Alg3	NM_145939
161066_at	asparagine-linked glycosylation 5 homolog (yeast, dolichyl-phosphate beta-glucosyltransferase)	Alg5	NM_025442
101058_at	amylase 1, salivary	Amy1	NM_007446
97523_i_at	amylase 2, pancreatic	Amy2	NM_009669
97524_f_at	amylase 2, pancreatic	Amy2	NM_009669
99068_at	anaphase promoting complex subunit 1	Anapc1	NM_008569
100948_at	progressive ankylosis	Ank	NM_020332
98477_s_at	ankyrin 3, epithelial	Ank3	NM_009670 /// NM_146005 /// NM_170687 /// NM_170688 /// NM_170689 /// NM_170690 /// NM_170728 /// NM_170729 /// NM_170730
102054_at	ankyrin repeat and FYVE domain containing 1	Ankfy1	NM_009671
92787_at	ankyrin repeat domain 10	Ankrd10	NM_133971
93627_at	ankyrin repeat domain 28	Ankrd28	XM_127673
96784_at	anillin, actin binding protein (scraps homolog, Drosophila)	Anln	NM_028390
93372_at	acidic (leucine-rich) nuclear phosphoprotein 32 family, member A	Anp32a	NM_009672
96891_at	acidic nuclear phosphoprotein 32 family, member B	Anp32b	NM_130889
97556_at	acidic (leucine-rich) nuclear phosphoprotein 32 family, member E	Anp32e	NM_023210
92494_at	annexin A10	Anxa10	NM_011922
102815_at	annexin A11	Anxa11	NM_013469
100584_at	annexin A4	Anxa4	NM_013471
93083_at	annexin A5	Anxa5	NM_009673
94304_at	annexin A6	Anxa6	NM_013472
104011_at	aldehyde oxidase 1	Aox1	NM_009676
96529_at	AP1 gamma subunit binding protein 1	Ap1gbp1	NM_194341
102835_at	adaptor protein complex AP-2, alpha 2 subunit	Ap2a2	NM_007459
160734_at	adaptor-related protein complex 3, sigma 1 subunit	Ap3s1	NM_009681
104565_at	adaptor-related protein complex AP-4, sigma 1	Ap4s1	NM_021710
102750_at	amyloid beta (A4) precursor protein-binding, family A, member 3	Apba3	NM_018758
103298_at	Aortic preferentially expressed gene 1	Apeg1	NM_007463
93559_at	apurinic/apyrimidinic endonuclease 1	Apex1	NM_009687
160581_at	APG16 autophagy 16-like (S. cerevisiae)	Apg16l	NM_029846
94225_at	autophagy 5-like (S. cerevisiae)	Apg5l	NM_053069
104752_at	APAF1 interacting protein	Apip	NM_019735
94032_at	apolipoprotein A-I binding protein	Apoa1bp	NM_144897
99359_at	Hypothetical LOC403343	Apoa4	NM_007468
98398_s_at	apolipoprotein B editing complex 1	Apobec1	NM_031159
101016_at	ADP-ribosylation factor 1	Arf1	NM_007476
97811_at	ADP-ribosylation factor GTPase activating protein 3	Arfgap3	NM_025445
101866_at	ADP-ribosylation factor related protein 1	Arfrp1	NM_029702
160785_at	Rho GTPase activating protein 21	Arhgap21	XM_130033
102677_at	Rho GDP dissociation inhibitor (GDI) gamma	Arhgdig	NM_008113
160977_at	Rho guanine nucleotide exchange factor (GEF) 5	Arhgef5	XM_133067
104330_g_at	AT rich interactive domain 1A (Swi1 like)	Arid1a	NM_033566
103496_at	AT rich interactive domain 3A (Bright like)	Arid3a	NM_007880
95600_at	ariadne homolog 2 (Drosophila)	Arih2	NM_011790
92805_s_at	ADP-ribosylation factor-like 4	Arl4	NM_007487
160371_at	ADP-ribosylation factor-like 6 interacting protein 1	Arl6ip1	NM_019419
104745_at	ADP-ribosylation factor-like 6 interacting protein 2	Arl6ip2	NM_019717 /// NM_178050
95136_at	ADP-ribosylation factor-like 6 interacting protein 4	Arl6ip4	NM_144509
97211_at	armadillo repeat containing, X-linked 2	Armcx2	NM_026139
95749_at	arginine-rich, mutated in early stage tumors	Armet	NM_029103
102382_at	aryl hydrocarbon receptor nuclear translocator-like	Arntl	NM_007489
95144_at	actin related protein 2/3 complex, subunit 1A	Arpc1a	NM_019767
96357_at	actin related protein 2/3 complex, subunit 1B	Arpc1b	NM_023142
161466_r_at	ankyrin repeat and SOCS box-containing protein 3	Asb3	NM_023906
92375_at	activating signal cointegrator 1 complex subunit 1	Ascc1	NM_026937
98914_at	ASF1 anti-silencing function 1 homolog A (S. cerevisiae)	Asf1a	NM_025541
97364_at	ASF1 anti-silencing function 1 homolog B (S. cerevisiae)	Asf1b	NM_024184
103763_at	ash1 (absent, small, or homeotic)-like (Drosophila)	Ash1l	NM_138679
104566_at	argininosuccinate lyase	Asl	NM_133768
92702_at	astrotactin 1	Astn1	NM_007495
98455_at	activating transcription factor 2	Atf2	NM_009715
104155_f_at	activating transcription factor 3	Atf3	NM_007498
93797_g_at	ATPase, Na+/K+ transporting, alpha 1 polypeptide	Atp1a1	NM_144900
93798_at	ATPase, Na+/K+ transporting, alpha 1 polypeptide	Atp1a1	NM_144900
160500_at	ATPase, Na+/K+ transporting, beta 1 polypeptide	Atp1b1	NM_009721
162223_f_at	ATPase, Ca++ transporting, cardiac muscle, fast twitch 1	Atp2a1	NM_007504
99570_s_at	ATPase, Ca++ transporting, cardiac muscle, slow twitch 2	Atp2a2	NM_009722
103935_at	ATPase, Ca++ transporting, ubiquitous	Atp2a3	NM_016745
92798_at	ATP synthase, H+ transporting, mitochondrial F1 complex, gamma polypeptide 1	Atp5c1	NM_020615
92799_g_at	ATP synthase, H+ transporting, mitochondrial F1 complex, gamma polypeptide 1	Atp5c1	NM_020615
161145_f_at	ATP synthase, H+ transporting, mitochondrial F1 complex, delta subunit	Atp5d	NM_025313
162343_f_at	ATP synthase, H+ transporting, mitochondrial F1 complex, delta subunit	Atp5d	NM_025313
93596_i_at	ATP synthase, H+ transporting, mitochondrial F1 complex, epsilon subunit	Atp5e	NM_025983
102561_at	ATP synthase, H+ transporting, mitochondrial F1F0 complex, subunit e	Atp5k	NM_007507
99128_at	ATP synthase, H+ transporting, mitochondrial F1 complex, O subunit	Atp5o	NM_138597
92603_at	ATPase, H+ transporting, V0 subunit D isoform 1	Atp6v0d1	NM_013477
95746_at	ATPase, H+ transporting, V1 subunit A, isoform 1	Atp6v1a1	NM_007508
160577_at	ATPase, class II, type 9A	Atp9a	NM_015731
104252_at	expressed sequence AU020206	AU020206	---
102357_at	expressed sequence AU020772	AU020772	XM_204259
160811_at	expressed sequence AU022870	AU022870	NM_177682
93809_at	ancient ubiquitous protein	Aup1	NM_007517
92639_at	aurora kinase A	Aurka	NM_011497
98469_at	aurora kinase B	Aurkb	NM_011496
104260_at	expressed sequence AW112037	AW112037	---
104066_at	expressed sequence AW548124	AW548124	NM_134117
93488_at	expressed sequence AW550801	AW550801	NM_177325
103875_at	expressed sequence AW552001	AW552001	NM_031375
160701_at	axin 1	Axin1	NM_009733
96340_at	RIKEN cDNA B230114J08 gene	B230114J08Rik	NM_030018
102982_at	RIKEN cDNA B230308N11 gene	B230308N11Rik	---
160904_at	RIKEN cDNA B230317C12 gene	B230317C12Rik	NM_019833
95913_at	RIKEN cDNA B230333C21 gene	B230333C21Rik	XM_111900
161267_f_at	UDP-GlcNAc:betaGal beta-1,3-N-acetylglucosaminyltransferase 1	B3gnt1	NM_016888
160915_at	UDP-Gal:betaGlcNAc beta 1,4-galactosyltransferase, polypeptide 3	B4galt3	NM_020579
92243_at	RIKEN cDNA B930007L02 gene	B930007L02Rik	XM_356186
161500_i_at	Bcl-associated death promoter	Bad	NM_007522
99670_at	Bcl-associated death promoter	Bad	NM_007522
161129_r_at	Bcl2-associated athanogene 2	Bag2	NM_145392
103098_at	brain-specific angiogenesis inhibitor 1-associated protein 2	Baiap2	NM_130862
101105_at	barrier to autointegration factor 1	Banf1	NM_011793
95673_s_at	Brain abundant, membrane attached signal protein 1	Basp1	NM_027395
93900_at	HLA-B associated transcript 2	Bat2	NM_020027
97873_at	CDNA sequence BC004012	BC004012	NM_138671
94423_at	cDNA sequence BC004728	BC004728	NM_174992
160897_at	cDNA sequence BC005662	BC005662	NM_145376
103212_at	cDNA sequence BC006933	BC006933	NM_146040
95488_at	cDNA sequence BC010304	BC010304	---
95442_at	cDNA sequence BC010787	BC010787	NM_178577
103078_at	cDNA sequence BC014685	BC014685	NM_144916
93004_r_at	cDNA sequence BC018242	BC018242	NM_144935
104631_g_at	cDNA sequence BC021611	BC021611	NM_144932
103756_at	cDNA sequence BC023829	BC023829	XM_135913
96001_at	cDNA sequence BC024322	BC024322	NM_173748
97138_at	cDNA sequence BC026657	BC026657	---
100913_at	cDNA sequence BC026682	BC026682	NM_146149
92398_at	cDNA sequence BC026744	BC026744	NM_177876
101470_at	cDNA sequence BC028975	BC028975	NM_146254
97158_at	cDNA sequence BC030045	BC030045	---
103485_at	cDNA sequence BC030046	BC030046	XM_147850
103641_at	cDNA sequence BC030183	BC030183	NM_182783
160366_at	cDNA sequence BC031181	BC031181	NM_001001181
104643_at	cDNA sequence BC037006	BC037006	XM_109956
96518_at	cDNA sequence BC037006	BC037006	XM_109956
104366_at	cDNA sequence BC039093	BC039093	XM_131700
100889_at	cDNA sequence BC042901	BC042901	NM_175021
95940_f_at	cDNA sequence BC052328	BC052328	NM_198301
92963_at	cDNA sequence BC054822	BC054822	XM_354626
94802_at	cDNA sequence BC060632	BC060632	NM_198625
160876_at	B-cell receptor-associated protein 29	Bcap29	NM_007530
98545_at	B-cell receptor-associated protein 37	Bcap37	NM_007531
100443_at	branched chain aminotransferase 2, mitochondrial	Bcat2	NM_009737
96035_at	branched chain ketoacid dehydrogenase E1, alpha polypeptide	Bckdha	NM_007533
102302_at	branched chain ketoacid dehydrogenase E1, beta polypeptide	Bckdhb	NM_199195
101557_at	branched chain ketoacid dehydrogenase kinase	Bckdk	NM_009739
160380_at	beclin 1 (coiled-coil, myosin-like BCL2-interacting protein)	Becn1	NM_019584
98433_at	BH3 interacting domain death agonist	Bid	NM_007544
104702_at	BING4 protein	Bing4	NM_020603
101521_at	baculoviral IAP repeat-containing 5	Birc5	NM_009689
102754_at	baculoviral IAP repeat-containing 6	Birc6	NM_007566
98055_at	bladder cancer associated protein homolog (human)	Blcap	NM_016916
162221_i_at	bleomycin hydrolase	Blmh	NM_178645
94842_at	bleomycin hydrolase	Blmh	NM_178645
104124_at	biliverdin reductase A	Blvra	NM_026678
95557_at	bone morphogenetic protein 1	Bmp1	NM_009755
94363_at	BMS1-like, ribosome assembly protein (yeast)	Bms1l	NM_194339
99514_at	brain expressed myelocytomatosis oncogene	Bmyc	NM_023326
93836_at	BCL2/adenovirus E1B 19kDa-interacting protein 1, NIP3	Bnip3	NM_009760
160878_at	block of proliferation 1	Bop1	NM_013481
102976_at	breast cancer 1	Brca1	NM_009764
102911_at	breast cancer 2	Brca2	NM_009765
104352_at	bromodomain containing 4	Brd4	NM_020508 /// NM_198094
100543_s_at	bromodomain containing 7	Brd7	NM_012047
97892_at	bromodomain containing 8	Brd8	NM_030147
104348_at	brain and reproductive organ-expressed protein	Bre	NM_144541 /// NM_181279 /// NM_181280 /// NM_181281 /// NM_181282
95753_at	barren homolog (Drosophila)	Brrn1	NM_144818
93147_f_at	bruno-like 4, RNA binding protein (Drosophila)	Brunol4	NM_133195
101078_at	basigin	Bsg	NM_009768
93104_at	B-cell translocation gene 1, anti-proliferative	Btg1	NM_007569
101583_at	B-cell translocation gene 2, anti-proliferative	Btg2	NM_007570
96146_at	B-cell translocation gene 3	Btg3	NM_009770
96224_at	beta-transducin repeat containing protein	Btrc	NM_009771
104097_at	budding uninhibited by benzimidazoles 1 homolog (S. cerevisiae)	Bub1	NM_009772
97095_at	Budding uninhibited by benzimidazoles 1 homolog (S. cerevisiae)	Bub1	NM_009772
101961_at	budding uninhibited by benzimidazoles 3 homolog (S. cerevisiae)	Bub3	NM_009774
160227_s_at	bystin-like	Bysl	NM_016859
95462_at	basic leucine zipper and W2 domains 2	Bzw2	NM_025840
160386_at	RIKEN cDNA C130052I12 gene	C130052I12Rik	NM_146047
92408_at	RIKEN cDNA C130065N10 gene	C130065N10Rik	---
161549_f_at	C1q and tumor necrosis factor related protein 1	C1qtnf1	NM_019959
103695_f_at	RIKEN cDNA C330007P06 gene	C330007P06Rik	XM_135837
94952_at	RIKEN cDNA C330012H03 gene	C330012H03Rik	NM_183029
103908_at	RIKEN cDNA C330016H24 gene	C330016H24Rik	NM_026563 /// NM_030155
160973_at	RIKEN cDNA C330027C09 gene	C330027C09Rik	NM_172616
96226_at	RIKEN cDNA C330027I04 gene	C330027I04Rik	NM_026561
103033_at	complement component 4 (within H-2S) /// sex-limited protein	C4 /// Slp	NM_009780 /// NM_011413
95894_at	RIKEN cDNA C730036B14 gene	C730036B14Rik	NM_178912
160697_at	expressed sequence C77080	C77080	XM_110498
161696_f_at	expressed sequence C77080	C77080	XM_110498
95473_s_at	expressed sequence C77604	C77604	NM_001008705
97329_at	expressed sequence C77668	C77668	NM_145540 /// NM_178876
104157_at	expressed sequence C78212	C78212	NM_198176
94990_at	expressed sequence C78915	C78915	NM_019704
103308_at	expressed sequence C79407	C79407	NM_172578
95984_at	Expressed sequence C79468	C79468	---
95994_at	Expressed sequence C80012	C80012	---
96481_at	expressed sequence C80638	C80638	NM_178877
103682_at	expressed sequence C80913	C80913	NM_011274
104589_at	expressed sequence C80913	C80913	NM_011274
98386_s_at	calcium channel, voltage-dependent, L type, alpha 1C subunit	Cacna1c	NM_009781
98483_at	calcium channel, voltage-dependent, beta 3 subunit	Cacnb3	NM_007581
92988_i_at	Ca<2+>dependent activator protein for secretion	Cadps	NM_012061
92989_f_at	Ca<2+>dependent activator protein for secretion	Cadps	NM_012061
98133_at	calbindin-28K	Calb1	NM_009788
93293_at	calmodulin 2	Calm2	NM_007589
93744_at	calmodulin 4	Calm4	NM_020036
102632_at	calmodulin binding protein 1	Calmbp1	NM_009791
93660_at	calcium/calmodulin-dependent protein kinase II alpha	Camk2a	NM_009792 /// NM_177407
100453_at	calcium/calmodulin-dependent protein kinase II, beta	Camk2b	NM_007595
103562_f_at	Calcium/calmodulin-dependent protein kinase II, beta	Camk2b	NM_007595
161307_f_at	calpain 10	Capn10	NM_011796
97331_at	calpain 10	Capn10	NM_011796
101040_at	calpain 2	Capn2	NM_009794
99169_at	coactivator-associated arginine methyltransferase 1	Carm1	NM_021531
161263_f_at	caspase 2	Casp2	NM_007610
98437_at	Caspase 3, apoptosis related cysteine protease	Casp3	NM_009810
104290_at	caspase 8 associated protein 2	Casp8ap2	NM_011997
93364_at	catenin alpha 1	Catna1	NM_009818
92228_at	catenin alpha 2	Catna2	NM_009819 /// NM_145732
95902_at	Core-binding factor, runt domain, alpha subunit 2, translocated to, 3 homolog (human)	Cbfa2t3h	NM_009824
96110_at	carbonyl reductase 1	Cbr1	NM_007620
102833_at	chromobox homolog 2 (Drosophila Pc class)	Cbx2	NM_007623
93697_at	chromobox homolog 4 (Drosophila Pc class)	Cbx4	NM_007625
160942_at	chromobox homolog 6	Cbx6	NM_028763
96055_at	cholecystokinin	Cck	NM_031161
92252_at	cholecystokinin A receptor	Cckar	NM_009827
94166_g_at	chemokine (C-C motif) ligand 1	Ccl1	NM_011329
98406_at	chemokine (C-C motif) ligand 5	Ccl5	NM_013653
99186_at	cyclin A2	Ccna2	NM_009828
160159_at	cyclin B1, related sequence 1 /// cyclin B1	Ccnb1-rs1 /// Ccnb1	NM_172301
94294_at	cyclin B2	Ccnb2	NM_007630
99558_at	cyclin C	Ccnc	NM_016746
94232_at	cyclin D1	Ccnd1	NM_007631
101483_at	cyclin D-type binding-protein 1	Ccndbp1	NM_010761
99073_at	cyclin F	Ccnf	NM_007634
98478_at	cyclin G2	Ccng2	NM_007635
94819_f_at	cyclin I	Ccni	NM_017367
96598_at	cyclin J	Ccnj	NM_172839
162384_f_at	CCR4 carbon catabolite repression 4-like (S. cerevisiae)	Ccrn4l	NM_009834
99535_at	CCR4 carbon catabolite repression 4-like (S. cerevisiae)	Ccrn4l	NM_009834
93907_f_at	CCR4 carbon catabolite repression 4-like (S. cerevisiae) /// intracisternal A particles /// hypothetical protein LOC280487 /// similar to RIKEN cDNA 2610524H06 gene	Ccrn4l /// Iap /// LOC280487 /// LOC434662	NM_009834 /// NM_010490 /// NM_183299 /// XM_486526
162382_f_at	copper chaperone for superoxide dismutase	Ccs	NM_016892
98446_s_at	chaperonin subunit 3 (gamma)	Cct3	NM_009836
101011_at	chaperonin subunit 4 (delta)	Cct4	NM_009837
160102_at	chaperonin subunit 8 (theta)	Cct8	NM_009840
101851_at	Cd200 antigen	Cd200	NM_010818
100600_at	CD24a antigen	Cd24a	NM_009846
95020_at	CD47 antigen (Rh-related antigen, integrin-associated signal transducer)	Cd47	NM_010581
101495_at	CD 81 antigen	Cd81	NM_133655
96319_at	cell division cycle 20 homolog (S. cerevisiae)	Cdc20	NM_023223
104090_at	CDC23 (cell division cycle 23, yeast, homolog)	Cdc23	NM_178347
102934_s_at	cell division cycle 25 homolog C (S. cerevisiae)	Cdc25c	NM_009860
102935_at	cell division cycle 25 homolog C (S. cerevisiae)	Cdc25c	NM_009860
100128_at	cell division cycle 2 homolog A (S. pombe)	Cdc2a	NM_007659
95805_at	cell division cycle 2-like 1	Cdc2l1	NM_007661
94048_at	cell division cycle 34 homolog (S. cerevisiae)	Cdc34	NM_177613
99135_at	cell division cycle 37 homolog (S. cerevisiae)	Cdc37	NM_016742
103821_at	cell division cycle 6 homolog (S. cerevisiae)	Cdc6	NM_011799
103797_at	cell division cycle 7 (S. cerevisiae)	Cdc7	NM_009863
94217_f_at	cell division cycle associated 3	Cdca3	NM_013538
96200_at	cell division cycle associated 4	Cdca4	NM_028023
160699_at	cell division cycle associated 5	Cdca5	NM_026410
161332_f_at	cell division cycle associated 5	Cdca5	NM_026410
95063_at	cell division cycle associated 7	Cdca7	NM_025866
97295_at	cell division cycle associated 8	Cdca8	NM_026560
96155_at	CDK5 regulatory subunit associated protein 3	Cdk5rap3	NM_030248
98067_at	cyclin-dependent kinase inhibitor 1A (P21)	Cdkn1a	NM_007669
101900_at	cyclin-dependent kinase inhibitor 2B (p15, inhibits CDK4)	Cdkn2b	NM_007670
94521_at	cyclin-dependent kinase inhibitor 2D (p19, inhibits CDK4)	Cdkn2d	NM_009878
94971_at	cyclin-dependent kinase inhibitor 3	Cdkn3	XM_484366
160326_at	carnitine deficiency-associated gene expressed in ventricle 3	Cdv3	NM_175565 /// NM_175833
160441_at	CEA-related cell adhesion molecule 11	Ceacam11	NM_023289
160894_at	CCAAT/enhancer binding protein (C/EBP), delta	Cebpd	NM_007679
94466_f_at	CCAAT/enhancer binding protein zeta	Cebpz	NM_009882
98770_at	centromere autoantigen C1	Cenpc1	NM_007683
160947_at	centaurin, delta 3	Centd3	NM_139206
162251_f_at	centaurin, gamma 2	Centg2	NM_178119
92397_at	centaurin, gamma 2	Centg2	NM_178119
101145_at	Centrosomal protein 2	Cep2	XM_358344
104733_at	centrin 2	Cetn2	NM_019405
93561_at	coiled-coil-helix-coiled-coil-helix domain containing 6	Chchd6	NM_025351
101459_at	chromodomain helicase DNA binding protein 1	Chd1	NM_007690
99120_f_at	chromodomain helicase DNA binding protein 4	Chd4	NM_145979
103064_at	checkpoint kinase 1 homolog (S. pombe)	Chek1	NM_007691
92481_at	CHK2 checkpoint homolog (S. pombe)	Chek2	NM_016681
92841_f_at	chromogranin B	Chgb	NM_007694
102027_s_at	choline kinase beta	Chkb	NM_007692
93705_at	cholinergic receptor, nicotinic, beta polypeptide 1 (muscle)	Chrnb1	NM_009601
99070_at	conserved helix-loop-helix ubiquitous kinase	Chuk	NM_007700
99536_at	calcium and integrin binding family member 2	Cib2	NM_019686
93284_at	cold inducible RNA binding protein	Cirbp	NM_007705
101973_at	Cbp/p300-interacting transactivator, with Glu/Asp-rich carboxy-terminal domain, 2	Cited2	NM_010828
97276_at	cytoskeleton-associated protein 1	Ckap1	NM_025548
104322_at	cytoskeleton associated protein 2	Ckap2	NM_001004140
97360_at	chemokine-like factor super family 3	Cklfsf3	NM_024217
160565_at	creatine kinase, mitochondrial 1, ubiquitous	Ckmt1	NM_009897
161495_r_at	creatine kinase, mitochondrial 1, ubiquitous	Ckmt1	NM_009897
97468_at	CDC28 protein kinase 1b	Cks1b	NM_016904
97527_at	CDC28 protein kinase regulatory subunit 2	Cks2	NM_025415
103812_at	chloride channel calcium activated 1	Clca1	NM_009899
95376_at	Chloride channel 1	Clcn1	NM_013491
102786_at	Chloride channel 3	Clcn3	NM_007711 /// NM_173876
104391_s_at	chloride channel 7	Clcn7	NM_011930
93595_at	ceroid-lipofuscinosis, neuronal 2	Cln2	NM_009906
102659_at	ceroid lipofuscinosis, neuronal 3, juvenile (Batten, Spielmeyer-Vogt disease)	Cln3	NM_009907
160671_at	ceroid-lipofuscinosis, neuronal 8	Cln8	NM_012000
93048_at	caseinolytic protease, ATP-dependent, proteolytic subunit homolog (E. coli)	Clpp	NM_017393
161294_f_at	clusterin	Clu	NM_013492
94735_s_at	chymase 2, mast cell /// mast cell protease 9 /// mast cell protease-like	Cma2 /// Mcpt9 /// Mcptl	NM_007716 /// NM_008573 /// NM_010782
98593_at	cytidine monophospho-N-acetylneuraminic acid synthetase	Cmas	NM_009908
92835_at	camello-like 1	Cml1	NM_023160
101086_f_at	cellular nucleic acid binding protein 1	Cnbp1	NM_013493
160349_at	CNDP dipeptidase 2 (metallopeptidase M20 family)	Cndp2	NM_023149
94281_at	CCR4-NOT transcription complex, subunit 2	Cnot2	NM_028082
102966_at	CCR4-NOT transcription complex, subunit 6-like	Cnot6l	NM_144910 /// NM_178854
94241_at	Coenzyme A synthase	Coasy	NM_027896
97377_at	coilin	Coil	NM_016706 /// NM_181329
102262_r_at	procollagen, type XIII, alpha 1	Col13a1	NM_007731
161984_f_at	procollagen, type III, alpha 1	Col3a1	NM_009930
93472_at	Procollagen, type V, alpha 1	Col5a1	NM_015734
99167_at	COMM domain containing 4	Commd4	NM_025417
97419_at	COMM domain containing 7	Commd7	NM_133850
96854_at	coatomer protein complex subunit alpha	Copa	NM_009938
94992_at	coatomer protein complex, subunit beta 1	Copb1	NM_033370
93340_f_at	coatomer protein complex, subunit beta 2 (beta prime)	Copb2	NM_015827
93341_r_at	coatomer protein complex, subunit beta 2 (beta prime)	Copb2	NM_015827
96936_at	coatomer protein complex, subunit gamma	Copg	NM_017477 /// NM_201244
92875_s_at	COP9 (constitutive photomorphogenic) homolog, subunit 7a (Arabidopsis thaliana)	Cops7a	NM_012003
95149_at	coatomer protein complex, subunit zeta 1	Copz1	NM_019817
104143_at	coatomer protein complex, subunit zeta 2	Copz2	NM_019877
99365_at	coenzyme Q3 homolog, methyltransferase (yeast)	Coq3	NM_172687
93582_at	demethyl-Q 7	Coq7	NM_009940
102124_f_at	cytochrome c oxidase subunit IV isoform 1	Cox4i1	NM_009941
99631_f_at	cytochrome c oxidase, subunit VI a, polypeptide 1	Cox6a1	NM_007748
99667_at	cytochrome c oxidase, subunit VI a, polypeptide 2	Cox6a2	NM_009943
97352_f_at	cytochrome c oxidase subunit VIb polypeptide 2	Cox6b2	NM_183405 /// NM_183406
100551_r_at	V-src suppressed transcript 3	Cox6c	NM_053071
93820_at	cytochrome c oxidase, subunit VIIa 2	Cox7a2	NM_009945
160655_at	carboxypeptidase D	Cpd	NM_007754
160680_at	cytoplasmic polyadenylation element binding protein 1	Cpeb1	NM_007755
104274_at	Copine III	Cpne3	NM_027769
96234_at	cleavage and polyadenylation specificity factor 3	Cpsf3	NM_018813
101371_at	cleavage and polyadenylation specific factor 4	Cpsf4	NM_178576
93320_at	carnitine palmitoyltransferase 1a, liver	Cpt1a	NM_013495
95646_at	carnitine palmitoyltransferase 2	Cpt2	NM_009949
103646_at	carnitine acetyltransferase	Crat	NM_007760
104584_f_at	crumbs homolog 3 (Drosophila)	Crb3	NM_177638
103334_at	calcitonin gene-related peptide-receptor component protein	Crcp	NM_007761
102672_g_at	cAMP responsive element binding protein 1	Creb1	NM_009952 /// NM_133828
92394_f_at	cAMP responsive element binding protein-like 1	Crebl1	NM_017406
98395_at	corticotropin releasing hormone receptor 2	Crhr2	NM_009953
161046_at	cytokine receptor-like factor 1	Crlf1	NM_018827
104383_at	collapsin response mediator protein 1	Crmp1	NM_007765
160751_i_at	Crn, crooked neck-like 1 (Drosophila)	Crnkl1	NM_025820
101879_s_at	complement receptor related protein	Crry	NM_013499
162018_r_at	Crystallin, gamma F	Cryge	NM_007777
103955_at	crystallin, lamda 1	Cryl1	NM_030004
99666_at	citrate synthase	Cs	NM_026444
101450_at	colony stimulating factor 1 (macrophage)	Csf1	NM_007778
94046_at	c-src tyrosine kinase	Csk	NM_007783
99065_at	casein kappa	Csnk	NM_007786
99650_at	casein kinase 1, alpha 1	Csnk1a1	NM_146087
97925_at	casein kinase 1, epsilon	Csnk1e	NM_013767
96284_at	casein kinase 1, gamma 2	Csnk1g2	NM_134002
104545_at	casein kinase II, alpha 1 polypeptide	Csnk2a1	NM_007788
100019_at	chondroitin sulfate proteoglycan 2	Cspg2	XM_488510
98799_g_at	chondroitin sulfate proteoglycan 3	Cspg3	NM_007789
161522_i_at	cystatin C	Cst3	NM_009976
99586_at	cystatin C	Cst3	NM_009976
100581_at	cystatin B	Cstb	NM_007793
100968_at	cleavage stimulation factor, 3' pre-RNA, subunit 3	Cstf3	NM_145529
160979_at	C-terminal binding protein 2	Ctbp2	NM_009980
96912_s_at	cytotoxic T lymphocyte-associated protein 2 alpha /// cytotoxic T lymphocyte-associated protein 2 beta	Ctla2a /// Ctla2b	NM_007796
103341_at	cytidine 5'-triphosphate synthase	Ctps	NM_016748
160421_r_at	chymotrypsinogen B1	Ctrb1	NM_025583
92256_at	cathepsin B	Ctsb	NM_007798
160406_at	cathepsin K	Ctsk	NM_007802
101963_at	cathepsin L	Ctsl	NM_009984
92633_at	cathepsin Z	Ctsz	NM_022325
94999_at	cubilin (intrinsic factor-cobalamin receptor)	Cubn	XM_130038
95000_g_at	cubilin (intrinsic factor-cobalamin receptor)	Cubn	XM_130038
99179_at	CUE domain containing 2	Cuedc2	NM_024192
97255_at	CUG triplet repeat,RNA binding protein 2	Cugbp2	NM_010160
94002_at	cullin 1	Cul1	NM_012042
98073_at	cut-like 1 (Drosophila)	Cutl1	NM_009986 /// NM_198602
162196_f_at	CUB and zona pellucida-like domains 1	Cuzd1	NM_008411
161752_r_at	chemokine (C-X3-C motif) ligand 1	Cx3cl1	NM_009142
98008_at	chemokine (C-X3-C motif) ligand 1	Cx3cl1	NM_009142
103099_f_at	CXXC finger 1 (PHD domain)	Cxxc1	NM_028868
103423_at	cytochrome b-561	Cyb561	NM_007805
102009_at	cytoplasmic FMR1 interacting protein 2	Cyfip2	NM_133769
103466_at	Cysteine and histidine rich 1	Cyhr1	NM_019396 /// NM_180962
161831_at	cytochrome P450, family 1, subfamily a, polypeptide 1	Cyp1a1	NM_009992
102847_s_at	cytochrome P450, family 2, subfamily a, polypeptide 4 /// cytochrome P450, family 2, subfamily a, polypeptide 5	Cyp2a4 /// Cyp2a5	NM_007812 /// NM_009997
101287_s_at	cytochrome P450, family 2, subfamily d, polypeptide 10	Cyp2d10	NM_010005
98353_at	cytochrome P450, family 4, subfamily a, polypeptide 10 /// cDNA sequence BC013476	Cyp4a10 /// BC013476	NM_010011 /// NM_201640
161345_f_at	cytochrome P450, family 7, subfamily b, polypeptide 1	Cyp7b1	NM_007825
92898_at	cytochrome P450, family 7, subfamily b, polypeptide 1	Cyp7b1	NM_007825
94957_at	RIKEN cDNA D030028O16 gene	D030028O16Rik	NM_145984
96526_at	RIKEN cDNA D030029J20 gene	D030029J20Rik	---
94784_at	Hypothetical protein D030034H08	D030034H08	NM_001001306
160768_at	hypothetical protein D030056L22	D030056L22	NM_177640
96524_at	RIKEN cDNA D030068L24 gene	D030068L24Rik	XM_111244
160522_at	DNA segment, human D4S114	D0H4S114	NM_053078
160803_at	DNA segment, Human S2298E	D0H8S2298E	NM_178648
94111_r_at	cDNA sequence D10627	D10627	XM_486116
104045_at	DNA segment, Chr 10, Brigham & Women's Genetics 0791 expressed	D10Bwg0791e	NM_030203 /// NM_133745
161504_i_at	DNA segment, Chr 10, ERATO Doi 214, expressed	D10Ertd214e	NM_134007
104087_at	DNA segment, Chr 10, ERATO Doi 641, expressed	D10Ertd641e	NM_025514
96757_at	DNA segment, Chr 10, Johns Hopkins University 81 expressed	D10Jhu81e	NM_138601
104187_at	DNA segment, Chr 10, Wayne State University 93, expressed	D10Wsu93e	NM_033072
96270_at	DNA segment, Chr 11, Brigham & Women's Genetics 0434 expressed	D11Bwg0434e	NM_173742
100041_at	DNA segment, Chr 11, ERATO Doi 333, expressed	D11Ertd333e	NM_026542
96932_at	DNA segment, Chr 11, ERATO Doi 603, expressed	D11Ertd603e	NM_026023
100527_at	DNA segment, Chr 11, ERATO Doi 99, expressed	D11Ertd99e	NM_026618
93775_at	DNA segment, Chr 12, ERATO Doi 647, expressed	D12Ertd647e	NM_026790 /// NM_194066 /// NM_194067 /// NM_194068 /// NM_194069
95656_i_at	DNA segment, Chr 13, Wayne State University 177, expressed	D13Wsu177e	NM_178605
95657_f_at	DNA segment, Chr 13, Wayne State University 177, expressed	D13Wsu177e	NM_178605
160783_at	DNA segment, Chr 14, ERATO Doi 436, expressed	D14Ertd436e	NM_172599
94561_at	DNA segment, Chr 15, ERATO Doi 366, expressed	D15Ertd366e	NM_023063
96240_at	DNA segment, Chr 15, ERATO Doi 405, expressed	D15Ertd405e	NM_201359
160595_at	DNA segment, Chr 15, ERATO Doi 682, expressed	D15Ertd682e	NM_028003
162190_r_at	DNA segment, Chr 15, ERATO Doi 735, expressed	D15Ertd735e	NM_029098
160347_at	DNA segment, Chr 15, ERATO Doi 785, expressed	D15Ertd785e	NM_025795
103447_at	DNA segment, Chr 15, Wayne State University 169, expressed	D15Wsu169e	NM_198420
95025_at	DNA segment, Chr 16, human D22S680E, expressed	D16H22S680E	NM_138583
100347_at	Expressed sequence D17892	D17892	---
96785_at	DNA segment, Chr 17, ERATO Doi 288, expressed	D17Ertd288e	NM_030697
104333_at	DNA segment, Chr 17, human D6S56E 5	D17H6S56E-5	NM_033075
96318_at	DNA segment, Chr 17, Wayne State University 104, expressed	D17Wsu104e	NM_080837
160310_at	DNA segment, Chr 19, Brigham & Women's Genetics 1357 expressed	D19Bwg1357e	NM_177474
95679_at	DNA segment, Chr 19, ERATO Doi 144, expressed	D19Ertd144e	NM_026373
160779_at	DNA segment, Chr 19, ERATO Doi 703, expressed	D19Ertd703e	NM_029456
94480_at	DNA segment, Chr 1, ERATO Doi 161, expressed	D1Ertd161e	NM_026187
104740_at	DNA segment, Chr 1, ERATO Doi 251, expressed	D1Ertd251e	NM_030245
101914_at	DNA segment, Chr 1, ERATO Doi 396, expressed	D1Ertd396e	NM_021421
95428_at	DNA segment, Chr 1, Wayne State University 40, expressed	D1Wsu40e	NM_178601
93232_at	DNA segment, Chr 2, ERATO Doi 217, expressed	D2Ertd217e	---
104122_at	RIKEN cDNA D330001F17 gene	D330001F17Rik	XM_283282
162350_at	RIKEN cDNA D330001F17 gene	D330001F17Rik	XM_283282
95397_at	RIKEN cDNA D430019H16 gene	D430019H16Rik	---
161715_f_at	DNA segment, Chr 4, ERATO Doi 196, expressed	D4Ertd196e	NM_025667
92542_at	DNA segment, Chr 4, Wayne State University 53, expressed	D4Wsu53e	NM_023665
161062_r_at	DNA segment, Chr 5, Brigham & Women's Genetics 0860 expressed	D5Bwg0860e	NM_027530
104116_at	DNA segment, Chr 5, ERATO Doi 593, expressed	D5Ertd593e	NM_175096
161785_f_at	DNA segment, Chr 5, Wayne State University 46, expressed	D5Wsu46e	NM_144913
97343_at	DNA segment, Chr 5, Wayne State University 46, expressed	D5Wsu46e	NM_144913
104661_at	RIKEN cDNA A630051L19 gene	D730040F13Rik	NM_175518
96629_at	DNA segment, Chr 7, Roswell Park 2 complex, expressed	D7Rp2e	NM_033080
103861_s_at	DNA segment, Chr 7, Wayne State University 128, expressed	D7Wsu128e	NM_138589
103862_r_at	DNA segment, Chr 7, Wayne State University 128, expressed	D7Wsu128e	NM_138589
98952_at	DNA segment, Chr 8, ERATO Doi 325, expressed	D8Ertd325e	NM_025804
94923_f_at	DNA segment, Chr 8, ERATO Doi 69, expressed	D8Ertd69e	XM_194424
104411_at	RIKEN cDNA D930048N14 gene	D930048N14Rik	NM_175289
97353_at	disabled homolog 2 (Drosophila) interacting protein	Dab2ip	NM_001001602
96008_at	defender against cell death 1	Dad1	NM_010015
161183_at	dystroglycan 1	Dag1	NM_010017
160346_at	DALR anticodon binding domain containing 3	Dalrd3	NM_026378
93842_at	death-associated protein	Dap	NM_146057
97372_at	DAZ associated protein 1	Dazap1	NM_133188
103430_at	drebrin 1	Dbn1	NM_019813
95529_at	drebrin-like	Dbnl	NM_013810
104230_at	DNA cross-link repair 1A, PSO2 homolog (S. cerevisiae)	Dclre1a	NM_018831
94299_at	dynactin 2	Dctn2	NM_027151
94522_at	dynactin 3	Dctn3	NM_016890
102307_at	doublecortin	Dcx	NM_010025
95683_g_at	damage specific DNA binding protein 1	Ddb1	NM_015735
160074_at	dopa decarboxylase	Ddc	NM_016672
103704_at	DDHD domain containing 2	Ddhd2	XM_356065
101429_at	DNA-damage inducible transcript 3	Ddit3	NM_007837
101074_at	dolichyl-di-phosphooligosaccharide-protein glycotransferase	Ddost	NM_007838
100155_at	discoidin domain receptor family, member 1	Ddr1	NM_007584
100564_at	D-dopachrome tautomerase	Ddt	NM_010027
101962_at	DEAD (Asp-Glu-Ala-Asp) box polypeptide 17	Ddx17	NM_152806 /// NM_199079 /// NM_199080
160492_at	DEAD (Asp-Glu-Ala-Asp) box polypeptide 18	Ddx18	NM_025860
99096_at	DEAD (Asp-Glu-Ala-Asp) box polypeptide 24	Ddx24	NM_020494
161041_at	DEAD (Asp-Glu-Ala-Asp) box polypeptide 25	Ddx25	NM_013932
99171_at	DEAD/H (Asp-Glu-Ala-Asp/His) box polypeptide 26	Ddx26	NM_008715
160663_at	DEAD (Asp-Glu-Ala-Asp) box polypeptide 41	Ddx41	NM_134059
161060_i_at	DEAD (Asp-Glu-Ala-Asp) box polypeptide 51	Ddx51	NM_027156
93964_s_at	DEAD (Asp-Glu-Ala-Asp) box polypeptide 6	Ddx6	NM_007841 /// NM_181324
160711_at	2,4-dienoyl CoA reductase 1, mitochondrial	Decr1	NM_026172
100882_at	defensin beta 1	Defb1	NM_007843
100351_f_at	defensin related cryptdin 3	Defcr3	NM_007850
92812_f_at	defensin related cryptdin 3 /// defensin related cryptdin 4 /// defensin related cryptdin 6 /// RIKEN cDNA 2010016F14 gene	Defcr3 /// Defcr4 /// Defcr6 /// 2010016F14Rik	NM_007850 /// NM_007852 /// NM_010039 /// NM_183268
99551_f_at	defensin related cryptdin 5	Defcr5	NM_007851
101384_at	degenerative spermatocyte homolog 2 (Drosophila), lipid desaturase	Degs2	NM_027299
160286_at	DEK oncogene (DNA binding)	Dek	NM_025900
160769_at	Der1-like domain family, member 2	Derl2	NM_033562
98989_at	7-dehydrocholesterol reductase	Dhcr7	NM_007856
161588_r_at	desert hedgehog	Dhh	NM_007857
103683_at	dihydroorotate dehydrogenase	Dhodh	NM_020046
96678_at	Dehydrogenase/reductase (SDR family) member 4	Dhrs4	NM_030686
102370_at	dehydrogenase/reductase (SDR family) member 8	Dhrs8	NM_053262
160285_at	DEAH (Asp-Glu-Ala-His) box polypeptide 40	Dhx40	NM_026191
94284_at	diaphorase 1 (NADH)	Dia1	NM_029787
160976_at	Diaphanous homolog 1 (Drosophila)	Diap1	NM_007858
98489_at	discs, large homolog 7 (Drosophila)	Dlg7	NM_144553
160849_at	discs, large homolog 1 (Drosophila)	Dlgh1	NM_007862
101975_at	delta-like 1 homolog (Drosophila)	Dlk1	NM_010052
97880_at	dihydrolipoamide S-succinyltransferase (E2 component of 2-oxo-glutarate complex)	Dlst	NM_030225
103444_at	DNA2 DNA replication helicase 2-like (yeast)	Dna2l	NM_177372
96254_at	DnaJ (Hsp40) homolog, subfamily B, member 1	Dnajb1	NM_018808
98451_at	DnaJ (Hsp40) homolog, subfamily B, member 10	Dnajb10	NM_020266 /// NM_178055
98572_at	DnaJ (Hsp40) homolog, subfamily B, member 11	Dnajb11	NM_026400
97481_r_at	DnaJ (Hsp40) homolog, subfamily B, member 3	Dnajb3	NM_008299
103903_at	DnaJ (Hsp40) homolog, subfamily C, member 11	Dnajc11	NM_172704
101890_f_at	DnaJ (Hsp40) homolog, subfamily C, member 2	Dnajc2	NM_009583 /// NM_009584
104738_at	DnaJ (Hsp40) homolog, subfamily C, member 2	Dnajc2	NM_009583 /// NM_009584
94343_at	DnaJ (Hsp40) homolog, subfamily C, member 3	Dnajc3	NM_008929
96770_at	deoxyribonuclease 1-like 2	Dnase1l2	NM_025718
103030_at	dynamin 1	Dnm1	NM_010065
103031_g_at	dynamin 1	Dnm1	NM_010065
101445_at	DNA methyltransferase (cytosine-5) 1	Dnmt1	NM_010066
161601_i_at	DNA methyltransferase (cytosine-5) 1	Dnmt1	NM_010066
93470_at	DNA methyltransferase 2	Dnmt2	NM_010067
100479_at	DNA methyltransferase 3A	Dnmt3a	NM_007872 /// NM_153743
101191_at	double C2, beta	Doc2b	NM_007873
103356_at	dedicator of cytokinesis 7	Dock7	NM_026082
104714_at	dedicator of cytokinesis 9	Dock9	XM_358315
103886_at	deleted in polyposis 1	Dp1	NM_007874
96134_at	deleted in polyposis 1-like 1	Dp1l1	NM_139292
92828_at	dolichol-phosphate (beta-D) mannosyltransferase 1	Dpm1	NM_010072
92634_at	dipeptidylpeptidase 4	Dpp4	NM_010074
104036_at	dipeptidylpeptidase 7	Dpp7	NM_031843
93379_at	dihydropyrimidinase-like 4	Dpysl4	NM_011993
100555_at	Down syndrome critical region homolog 1 (human)	Dscr1	NM_019466
101104_at	Down syndrome critical region gene 3	Dscr3	NM_007834
162486_f_at	Down syndrome critical region gene 3	Dscr3	NM_007834
94492_at	destrin	Dstn	NM_019771
102210_at	dystrobrevin, beta	Dtnb	NM_007886
104598_at	dual specificity phosphatase 1	Dusp1	NM_013642
94980_at	dual specificity phosphatase 11 (RNA/RNP complex 1-interacting)	Dusp11	NM_028099
98431_at	dual specificity phosphatase 12	Dusp12	NM_023173
97740_at	dual specificity phosphatase 16	Dusp16	NM_130447 /// NM_181320
92758_at	dual specificity phosphatase 2	Dusp2	NM_010090
161171_at	dual specificity phosphatase 8	Dusp8	NM_008748
92362_at	dual specificity phosphatase 8	Dusp8	NM_008748
96813_f_at	DNA segment, Chr X, Immunex 46, expressed	DXImx46e	NM_138604
104079_at	dual-specificity tyrosine-(Y)-phosphorylation regulated kinase 1a	Dyrk1a	NM_007890
99366_at	RIKEN cDNA E030024M05 gene	E030024M05Rik	NM_172574
104198_at	RIKEN cDNA E030027H19 gene	E030027H19Rik	NM_133974
97752_at	RIKEN cDNA E130013N09 gene	E130013N09Rik	XM_488964
103326_at	RIKEN cDNA E130107N23 gene	E130107N23Rik	NM_173038
100765_at	RIKEN cDNA E230011A21 gene	E230011A21Rik	NM_177091
102963_at	E2F transcription factor 1	E2f1	NM_007891
161427_f_at	E2F transcription factor 1	E2f1	NM_007891
98995_at	E2F transcription factor 5	E2f5	NM_007892
103669_at	RIKEN cDNA E330034G19 gene	E330034G19Rik	XM_138939
94913_at	RIKEN cDNA E430034L04 gene	E430034L04Rik	NM_011816
96297_at	EBNA1 binding protein 2	Ebna1bp2	NM_026932
103456_at	endothelin converting enzyme 1	Ece1	NM_199307
160292_at	endothelial cell growth factor 1 (platelet-derived)	Ecgf1	NM_138302
93754_at	enoyl coenzyme A hydratase 1, peroxisomal	Ech1	NM_016772
97411_at	ect2 oncogene	Ect2	NM_007900
104065_at	ER degradation enhancer, mannosidase alpha-like 1	Edem1	NM_138677
96322_at	endothelial differentiation-related factor 1	Edf1	NM_021519
160129_at	eukaryotic translation elongation factor 1 delta (guanine nucleotide exchange protein)	Eef1d	NM_023240 /// NM_029663
97559_at	eukaryotic translation elongation factor 2	Eef2	NM_007907
103007_at	ephrin A1	Efna1	NM_010107
96338_at	EGL nine homolog 2 (C. elegans)	Egln2	NM_053208
161802_i_at	Early growth response 1	Egr1	NM_007913
103708_at	eukaryotic translation initiation factor 1A	Eif1a	NM_010120
93058_at	eukaryotic translation initiation factor 1A	Eif1a	NM_010120
160111_at	eukaryotic translation initiation factor 1A, Y-linked	Eif1ay	NM_025437
93737_at	eukaryotic translation initiation factor 2 alpha kinase 1	Eif2ak1	NM_013557
103537_at	eukaryotic translation initiation factor 2 alpha kinase 3	Eif2ak3	NM_010121
96822_at	eukaryotic translation initiation factor 2B, subunit 5 epsilon	Eif2b5	NM_172265
103994_at	eukaryotic translation initiation factor 2C, 2	Eif2c2	NM_153178
97205_at	eukaryotic translation initiation factor 3, subunit 1 alpha	Eif3s1	NM_144545
95715_at	eukaryotic translation initiation factor 3, subunit 12	Eif3s12	NM_028659
96942_at	eukaryotic translation initiation factor 3, subunit 6 interacting protein	Eif3s6ip	NM_145139
99101_at	eukaryotic translation initiation factor 3, subunit 7 (zeta)	Eif3s7	NM_018749
93973_at	eukaryotic translation initiation factor 3, subunit 9 (eta)	Eif3s9	NM_133916
100557_g_at	eukaryotic translation initiation factor 4B	Eif4b	NM_145625
96843_at	eukaryotic translation initiation factor 4E member 2	Eif4e2	NM_023314
100636_at	eukaryotic translation initiation factor 4E binding protein 1	Eif4ebp1	NM_007918
101072_at	Eukaryotic translation initiation factor 4E binding protein 2	Eif4ebp2	NM_010124
93783_at	elastase 1, pancreatic	Ela1	NM_033612
94037_at	elastase 2	Ela2	NM_007919
97166_at	elaC homolog 2 (E. coli)	Elac2	NM_023479
94001_at	ELAV (embryonic lethal, abnormal vision, Drosophila)-like 1 (Hu antigen R)	Elavl1	NM_010485
103891_i_at	elongation factor RNA polymerase II 2	Ell2	XM_484289
94393_r_at	elongation of very long chain fatty acids (FEN1/Elo2, SUR4/Elo3, yeast)-like 2	Elovl2	NM_019423
103665_at	ELOVL family member 6, elongation of long chain fatty acids (yeast)	Elovl6	NM_130450
94418_at	ELOVL family member 6, elongation of long chain fatty acids (yeast)	Elovl6	NM_130450
99347_f_at	echinoderm microtubule associated protein like 5	Eml5	XM_286452
160568_at	enolase 1, alpha non-neuron	Eno1	NM_023119
160774_at	ectonucleoside triphosphate diphosphohydrolase 1	Entpd1	NM_009848
161103_at	ectonucleoside triphosphate diphosphohydrolase 7	Entpd7	NM_053103
102698_at	endothelial PAS domain protein 1	Epas1	NM_010137
96143_at	erythrocyte protein band 4.1-like 4b	Epb4.1l4b	NM_019427
102682_at	Eph receptor A8	Epha8	NM_007939
98992_at	endothelial precursor protein B9	Eppb9	NM_013717
96771_at	v-erb-b2 erythroblastic leukemia viral oncogene homolog 3 (avian)	Erbb3	XM_125954
103483_at	excision repair cross-complementing rodent repair deficiency,complementation group 5	Ercc5	NM_011729
93670_at	Ets2 repressor factor	Erf	NM_010155
94040_at	enhancer of rudimentary homolog (Drosophila)	Erh	NM_007951
93945_at	estrogen receptor 1 (alpha)	Esr1	NM_007956
93946_at	estrogen receptor 1 (alpha)	Esr1	NM_007956
102145_f_at	estrogen related receptor, alpha	Esrra	NM_007953
103964_at	estrogen related receptor, alpha	Esrra	NM_007953
160451_at	eukaryotic translation termination factor 1	Etf1	NM_144866
96754_s_at	Eukaryotic translation termination factor 1	Etf1	NM_144866
98608_at	eukaryotic translation termination factor 1	Etf1	NM_144866
96112_at	electron transferring flavoprotein, alpha polypeptide	Etfa	NM_145615
96947_at	electron transferring flavoprotein, beta polypeptide	Etfb	NM_026695
97869_at	electron transferring flavoprotein, dehydrogenase	Etfdh	NM_025794
92927_at	ets variant gene 1	Etv1	NM_007960
161842_r_at	ets variant gene 4 (E1A enhancer binding protein, E1AF)	Etv4	NM_008815
160667_at	Ena-vasodilator stimulated phosphoprotein	Evl	NM_007965
99151_at	exosome component 7	Exosc7	XM_284543
95081_at	exosome component 8	Exosc8	NM_027148
102811_at	exostoses (multiple) 1	Ext1	NM_010162
95591_at	exostoses (multiple)-like 3	Extl3	NM_018788
99917_at	enhancer of zeste homolog 2 (Drosophila)	Ezh2	NM_007971
92267_at	coagulation factor II (thrombin) receptor	F2r	NM_010169
102915_at	coagulation factor II (thrombin) receptor-like 1	F2rl1	NM_007974
94191_at	coagulation factor II (thrombin) receptor-like 3	F2rl3	NM_007975
97689_at	coagulation factor III	F3	NM_010171
94799_at	coagulation factor VIII	F8	NM_007977
104621_at	RIKEN cDNA F830029L24 gene	F830029L24Rik	NM_172606
160544_at	fatty acid binding protein 5, epidermal	Fabp5	NM_010634
98967_at	fatty acid binding protein 7, brain	Fabp7	NM_021272
100500_at	Fas (TNFRSF6)-associated via death domain	Fadd	NM_010175
160391_at	fatty acid desaturase 1	Fads1	NM_146094
98588_at	fumarylacetoacetate hydrolase	Fah	NM_010176
103608_at	phenylalanine-tRNA synthetase 1 (mitochondrial)	Fars1	NM_024274
160231_at	phenylalanine-tRNA synthetase-like, alpha subunit	Farsla	NM_025648
98575_at	fatty acid synthase	Fasn	NM_007988
160503_at	fibrillarin	Fbl	NM_007991
96918_at	fructose bisphosphatase 1	Fbp1	NM_019395
103427_at	F-box and leucine-rich repeat protein 3	Fbxl3	NM_015822
104109_at	F-box only protein 21	Fbxo21	NM_145564
103893_at	F-box protein 38	Fbxo38	NM_134136
93217_at	F-box protein 45	Fbxo45	NM_173439
98906_at	f-box only protein 9	Fbxo9	NM_023605
96797_s_at	F-box and WD-40 domain protein 5	Fbxw5	NM_013908
96799_at	F-box and WD-40 domain protein 5	Fbxw5	NM_013908
102337_s_at	Fc receptor, IgG, low affinity IIb	Fcgr2b	NM_010187
102065_at	ficolin A	Fcna	NM_007995
160424_f_at	farnesyl diphosphate synthetase	Fdps	NM_134469
99098_at	farnesyl diphosphate synthetase	Fdps	NM_134469
92587_at	ferredoxin 1	Fdx1	NM_007996
97213_at	feminization 1 homolog a (C. elegans)	Fem1a	NM_010192
97327_at	flap structure specific endonuclease 1	Fen1	NM_007999
100876_at	fasciculation and elongation protein zeta 1 (zygin I)	Fez1	NM_183171
162435_f_at	fasciculation and elongation protein zeta 1 (zygin I)	Fez1	NM_183171
92937_at	fibroblast growth factor receptor 4	Fgfr4	NM_008011
99148_at	fumarate hydratase 1	Fh1	NM_010209
100986_at	four and a half LIM domains 2	Fhl2	NM_010212
104255_at	formin-family protein FHOS2	FHOS2	NM_175276
160648_at	fidgetin-like 1	Fignl1	NM_021891
97964_at	FK506 binding protein 11	Fkbp11	NM_024169
103248_at	FK506 binding protein 1b	Fkbp1b	NM_016863
99546_at	FK506 binding protein 2	Fkbp2	NM_008020
92808_f_at	FK506 binding protein 4	Fkbp4	NM_010219
92809_r_at	FK506 binding protein 4	Fkbp4	NM_010219
94297_at	FK506 binding protein 5	Fkbp5	NM_010220
160242_at	folliculin	Flcn	NM_146018
97593_f_at	flightless I homolog (Drosophila)	Fliih	NM_022009
97594_r_at	flightless I homolog (Drosophila)	Fliih	NM_022009
98452_at	FMS-like tyrosine kinase 1	Flt1	NM_010228
102929_s_at	FMS-like tyrosine kinase 3 ligand	Flt3l	NM_013520
162024_at	formin 1	Fmn1	NM_010230
92483_g_at	formin-like 1	Fmnl1	NM_019679
101422_at	formin binding protein 4	Fnbp4	NM_018828
104419_at	fibronectin type III domain containing 3a	Fndc3a	NM_207636
162302_f_at	folate receptor 1 (adult)	Folr1	NM_008034
99835_at	fos-like antigen 1	Fosl1	NM_010235
93950_at	forkhead box A2	Foxa2	NM_010446
92958_at	forkhead box O3	Foxo3	NM_019740
104415_at	Forkhead box P1	Foxp1	NM_053202
160850_at	folylpolyglutamyl synthetase	Fpgs	NM_010236
103309_at	FK506 binding protein 12-rapamycin associated protein 1	Frap1	NM_020009
92416_at	frequenin homolog (Drosophila)	Freq	NM_019681
104672_at	frizzled-related protein	Frzb	NM_011356
94794_at	ferritin heavy chain 1	Fth1	NM_010239
95756_at	FtsJ homolog 3 (E. coli)	Ftsj3	NM_025310
94395_at	Far upstream element (FUSE) binding protein 1	Fubp1	NM_057172
93835_at	fucosidase, alpha-L- 1, tissue	Fuca1	NM_024243
100515_at	furin (paired basic amino acid cleaving enzyme)	Furin	NM_011046
102046_at	FUS interacting protein (serine-arginine rich) 1	Fusip1	NM_010178
98143_at	fucosyltransferase 8	Fut8	NM_016893
97197_r_at	Friend virus susceptibility 4	Fv4	NM_010245
99124_at	fractured callus expressed transcript 1	Fxc1	NM_019502
101407_at	frataxin	Fxn	NM_008044
93040_at	FXYD domain-containing ion transport regulator 1	Fxyd1	NM_019503 /// NM_052991 /// NM_052992 /// NM_194321
103394_at	FXYD domain-containing ion transport regulator 5	Fxyd5	NM_008761
161040_at	frizzled homolog 1 (Drosophila)	Fzd1	NM_021457
99844_at	frizzled homolog 9 (Drosophila)	Fzd9	XM_284144
98075_at	RIKEN cDNA G431001I09 gene	G431001I09Rik	NM_133837
103333_at	glucose-6-phosphatase, catalytic	G6pc	NM_008061
95330_at	glucose-6-phosphatase, catalytic, 2	G6pc2	NM_021331
94966_at	glucose-6-phosphate dehydrogenase X-linked	G6pdx	NM_008062
160516_at	glucosidase, alpha, acid	Gaa	NM_008064
161341_f_at	GA repeat binding protein, beta 1	Gabpb1	NM_010249 /// NM_207669
100693_at	gamma-aminobutyric acid (GABA-A) receptor, subunit gamma 3	Gabrg3	NM_008074
103061_at	glutamic acid decarboxylase 1	Gad1	NM_008077
102292_at	growth arrest and DNA-damage-inducible 45 alpha	Gadd45a	NM_007836
102779_at	growth arrest and DNA-damage-inducible 45 beta	Gadd45b	NM_008655
161666_f_at	growth arrest and DNA-damage-inducible 45 beta	Gadd45b	NM_008655
101979_at	growth arrest and DNA-damage-inducible 45 gamma	Gadd45g	NM_011817
161594_f_at	galactose mutarotase	Galm	NM_176963
162031_f_at	galactose mutarotase	Galm	NM_176963
100066_at	phosphoribosylglycinamide formyltransferase	Gart	NM_010256
162472_f_at	gastrin	Gast	NM_010257
98797_at	gastrin	Gast	NM_010257
96336_at	glycine amidinotransferase (L-arginine:glycine amidinotransferase)	Gatm	NM_025961
100488_at	glucosidase, beta, acid	Gba	NM_008094
102003_at	golgi-specific brefeldin A-resistance factor 1	Gbf1	NM_178930
160628_at	glycine C-acetyltransferase (2-amino-3-ketobutyrate-coenzyme A ligase)	Gcat	NM_013847
103498_at	glucagon receptor	Gcgr	NM_008101
102313_at	GTP cyclohydrolase 1	Gch1	NM_008102
99649_at	glutamate-cysteine ligase, catalytic subunit	Gclc	NM_010295
96139_at	glucosidase 1	Gcs1	NM_020619
102967_at	ganglioside-induced differentiation-associated-protein 1	Gdap1	NM_010267
93642_at	growth differentiation factor 1 /// longevity assurance homolog 1 (S. cerevisiae)	Gdf1 /// Lass1	NM_008107 /// NM_138647
97313_at	guanosine diphosphate (GDP) dissociation inhibitor 1	Gdi1	NM_010273
92448_s_at	glial cell line derived neurotrophic factor family receptor alpha 2	Gfra2	NM_008115
102926_at	glial cell line derived neurotrophic factor family receptor alpha 3	Gfra3	NM_010280
160812_at	golgi associated, gamma adaptin ear containing, ARF binding protein 2	Gga2	NM_028758
93575_at	gamma-glutamyl hydrolase	Ggh	NM_010281
100085_at	gamma-glutamyltransferase 1	Ggt1	NM_008116
102968_at	gamma-glutamyltransferase-like activity 1	Ggtla1	NM_011820
92489_at	GTPase, IMAP family member 1	Gimap1	NM_008376 /// NM_175860
96172_at	GTPase, IMAP family member 4	Gimap4	NM_174990 /// NM_175048
98858_at	gastric inhibitory polypeptide	Gip	NM_008119
104729_at	gap junction membrane channel protein alpha 4	Gja4	NM_008120
161754_f_at	galactosidase, beta 1	Glb1	NM_009752
95603_at	glycine decarboxylase	Gldc	NM_138595
95722_at	glutaredoxin 1 (thioltransferase)	Glrx1	NM_053108
96925_at	glycosyltransferase 25 domain containing 1	Glt25d1	NM_146211
92586_at	glutamate dehydrogenase 1	Glud1	NM_008133
161826_r_at	glutamate-ammonia ligase (glutamine synthase)	Glul	NM_008131
98063_at	glycosylation dependent cell adhesion molecule 1	Glycam1	NM_008134
92615_at	gene model 137, (NCBI)	Gm137	XM_131359
96535_at	gene model 157, (NCBI)	Gm157	XM_133186
97384_at	glia maturation factor, gamma	Gmfg	NM_022024
93647_at	Gem-interacting protein	Gmip	NM_198101
160069_at	geminin	Gmnn	NM_020567
104351_at	GDP-mannose pyrophosphorylase B	Gmppb	NM_177910
104412_at	Guanine nucleotide binding protein, alpha inhibiting 1	Gnai1	XM_355574
99596_f_at	guanine nucleotide binding protein, alpha inhibiting 2	Gnai2	NM_008138
161902_f_at	guanine nucleotide binding protein, alpha o	Gnao1	NM_010308
98807_at	guanine nucleotide binding protein, alpha transducing 2	Gnat2	NM_008141
97924_at	glucosamine	Gne	NM_015828
160893_at	guanine nucleotide binding protein (G protein), gamma transducing activity polypeptide 2	Gngt2	NM_023121
98948_at	guanine nucleotide binding protein-like 3 (nucleolar)	Gnl3	NM_153547 /// NM_178846
96828_at	glycine N-methyltransferase	Gnmt	NM_010321
100565_at	glucosamine-6-phosphate deaminase 1	Gnpda1	NM_011937
94369_at	glucosamine-phosphate N-acetyltransferase 1	Gnpnat1	NM_019425
93951_at	golgi autoantigen, golgin subfamily a, 3	Golga3	NM_008146
102060_at	golgi autoantigen, golgin subfamily a, 4	Golga4	NM_018748
93777_at	golgi phosphoprotein 3-like	Golph3l	NM_146133
104004_at	golgi phosphoprotein 4	Golph4	NM_175193
94876_f_at	golgi reassembly stacking protein 2	Gorasp2	NM_027352
92217_s_at	glycoprotein 49 A /// leukocyte immunoglobulin-like receptor, subfamily B, member 4	Gp49a /// Lilrb4	NM_008147 /// NM_013532
101867_at	Glycerol-3-phosphate acyltransferase, mitochondrial	Gpam	NM_008149
102886_at	glypican 4	Gpc4	NM_008150
161753_f_at	glycerol-3-phosphate dehydrogenase 1 (soluble)	Gpd1	NM_010271
92592_at	glycerol-3-phosphate dehydrogenase 1 (soluble)	Gpd1	NM_010271
99441_at	gephyrin	Gphn	NM_172952
95566_at	glycosylphosphatidylinositol specific phospholipase D1	Gpld1	NM_008156
94566_at	G protein-coupled receptor 132	Gpr132	NM_019925
102305_at	G protein-coupled receptor 37-like 1	Gpr37l1	NM_134438
102217_at	G protein-coupled receptor kinase 5	Gprk5	NM_018869
102040_at	G protein-coupled receptor kinase 6	Gprk6	NM_011938
96943_at	G protein pathway suppressor 1	Gps1	NM_145370
99810_at	glutathione peroxidase 2	Gpx2	NM_030677
94206_at	gene rich cluster, C10 gene	Grcc10	NM_013535
103993_at	gene rich cluster, C9 gene	Grcc9	NM_013539
97726_at	glutamate receptor, ionotropic, NMDA2C (epsilon 3)	Grin2c	NM_010350
96684_at	G-rich RNA sequence binding factor 1	Grsf1	NM_178700
103853_at	glutamate-rich WD repeat containing 1	Grwd1	NM_153419
160646_at	glutathione reductase 1	Gsr	NM_010344
96670_at	glutathione S-transferase kappa 1	Gstk1	NM_029555
100629_at	glutathione S-transferase, mu 5	Gstm5	NM_010360
100630_f_at	glutathione S-transferase, mu 5	Gstm5	NM_010360
161722_f_at	glutathione S-transferase, mu 5	Gstm5	NM_010360
99583_at	glutathione S-transferase, pi 1	Gstp1	NM_013541
95019_at	glutathione S-transferase, theta 1	Gstt1	NM_008185
160350_at	glutathione transferase zeta 1 (maleylacetoacetate isomerase)	Gstz1	NM_010363
98101_at	general transcription factor II A, 2	Gtf2a2	NM_199151
103762_at	general transcription factor IIF, polypeptide 1	Gtf2f1	NM_133801
97354_at	general transcription factor III C 1	Gtf3c1	NM_207239
160172_at	GTL2, imprinted maternally expressed untranslated mRNA	Gtl2	NM_144513
93588_at	gene trap locus 3	Gtl3	NM_008187
104144_at	GTP binding protein 2	Gtpbp2	NM_019581
99180_at	GTP binding protein 4	Gtpbp4	NM_027000
103270_at	G two S phase expressed protein 1	Gtse1	NM_013882
97538_at	glucuronidase, beta	Gusb	NM_010368
97525_at	glycerol kinase	Gyk	NM_008194 /// NM_212444
98496_at	glycogen synthase 3, brain	Gys3	NM_008195
96117_r_at	histocompatibility 13	H13	NM_010376
160147_r_at	H1 histone family, member O, oocyte-specific	H1foo	NM_138311
92180_at	H1 histone family, member X	H1fx	NM_198622
93019_at	H2A histone family, member X	H2afx	NM_010436
101954_at	H2A histone family, member Z	H2afz	NM_016750
97540_f_at	histocompatibility 2, D region locus 1	H2-D1	NM_010380
97541_f_at	histocompatibility 2, D region locus 1 /// histocompatibility 2, D region /// MHC (A.CA/J(H-2K-f) class I antigen	H2-D1 /// H2-L /// LOC56628	NM_010380 /// NM_019909
94285_at	histocompatibility 2, class II antigen E beta	H2-Eb1	NM_010382
95158_at	H2-K region expressed gene 2	H2-Ke2	NM_010385
102991_s_at	H2-K region expressed gene 6	H2-Ke6	NM_013543
102731_g_at	histocompatibility 2, M region locus 3	H2-M3	NM_013819
98438_f_at	Histocompatibility 2, Q region locus 6	H2-Q7	NM_010394
101045_at	hydroxyacyl-Coenzyme A dehydrogenase type II	Hadh2	NM_016763
102323_at	huntingtin-associated protein 1	Hap1	NM_010404 /// NM_177981
98037_at	hepatitis B virus x interacting protein	Hbxip	XM_131076
100900_at	host cell factor C1	Hcfc1	NM_008224
93483_at	hemopoietic cell kinase	Hck	NM_010407
94194_s_at	hyperpolarization-activated, cyclic nucleotide-gated K+ 2	Hcn2	NM_008226
94195_r_at	hyperpolarization-activated, cyclic nucleotide-gated K+ 2	Hcn2	NM_008226
94188_at	hyperpolarization-activated, cyclic nucleotide-gated K+ 3	Hcn3	NM_008227
104471_at	histone deacetylase 6	Hdac6	NM_010413
96359_at	high density lipoprotein (HDL) binding protein	Hdlbp	NM_133808
95400_i_at	helicase (DNA) B	Helb	NM_080446
103829_at	hect (homologous to the E6-AP (UBE3A) carboxyl terminus) domain and RCC1 (CHC1)-like domain (RLD) 2	Herc2	NM_010418
95057_at	homocysteine-inducible, endoplasmic reticulum stress-inducible, ubiquitin-like domain member 1	Herpud1	NM_022331
97334_at	hairy and enhancer of split 6 (Drosophila)	Hes6	NM_019479
94365_at	histidine triad nucleotide binding protein 2	Hint2	XM_143732
162169_r_at	Histone 1, H2bp	Hist1h2bp	NM_178202
92908_at	human immunodeficiency virus type I enhancer binding protein 1	Hivep1	NM_007772
93258_at	hydroxymethylbilane synthase	Hmbs	NM_013551
93095_at	high mobility group box 1	Hmgb1	NM_010439
93250_r_at	high mobility group box 2	Hmgb2	XM_486109
98038_at	high mobility group box 3	Hmgb3	NM_008253
104285_at	3-hydroxy-3-methylglutaryl-Coenzyme A reductase	Hmgcr	NM_008255
101589_at	high mobility group nucleosomal binding domain 2	Hmgn2	NM_016957
93276_at	hematological and neurological expressed sequence 1	Hn1	NM_008258
94303_at	heterogeneous nuclear ribonucleoprotein D	Hnrpd	NM_007516
96084_at	heterogeneous nuclear ribonucleoprotein D-like	Hnrpdl	NM_016690
97491_at	heterogeneous nuclear ribonucleoprotein R	Hnrpr	NM_028871
103086_at	homeo box A5	Hoxa5	NM_010453
103835_f_at	hippocalcin-like 1	Hpcal1	NM_016677
98344_f_at	hippocalcin-like 1 /// RIKEN cDNA 2410018L13 gene	Hpcal1 /// 2410018L13Rik	NM_016677 /// NM_028362
98116_at	hemopexin	Hpxn	NM_017371
103397_at	HIV-1 Rev binding protein	Hrb	NM_010472
103727_at	HIV-1 Rev binding protein	Hrb	NM_010472
160427_at	HIV-1 Rev binding protein 2	Hrb2	NM_178610
92371_at	histidine rich calcium binding protein	Hrc	NM_010473
96048_at	heat-responsive protein 12	Hrsp12	NM_008287
102306_at	heparan sulfate 2-O-sulfotransferase 1	Hs2st1	NM_011828
101562_at	heat shock 70kDa protein 14	Hspa14	NM_015765
92571_at	heat shock protein 4	Hspa4	NM_008300
99489_at	heat shock 70kDa protein 4 like	Hspa4l	NM_011020
101955_at	heat shock 70kD protein 5 (glucose-regulated protein)	Hspa5	NM_022310
162448_f_at	heat shock 27kDa protein 8	Hspb8	NM_030704
95359_at	heat shock protein 1, beta	Hspcb	NM_008302
100525_at	HpaII tiny fragments locus 9c	Htf9c	NM_008307
92919_at	5-hydroxytryptamine (serotonin) receptor 3A	Htr3a	NM_013561
92503_at	Hus1 homolog (S. pombe)	Hus1	NM_008316
96664_at	HECT, UBA and WWE domain containing 1	Huwe1	XM_136108
99053_at	intercellular adhesion molecule 2	Icam2	NM_010494
160336_at	isoprenylcysteine carboxyl methyltransferase	Icmt	NM_133788
98002_at	interferon consensus sequence binding protein 1	Icsbp1	NM_008320
99150_at	immature colon carcinoma transcript 1	Ict1	NM_026729
162160_at	Insulin degrading enzyme	Ide	NM_031156
95693_at	isocitrate dehydrogenase 2 (NADP+), mitochondrial	Idh2	NM_173011
93029_at	isocitrate dehydrogenase 3 (NAD+), gamma	Idh3g	NM_008323
97444_at	interferon gamma inducible protein 30	Ifi30	NM_023065
100013_at	interferon-induced protein 35	Ifi35	NM_027320
93956_at	interferon-induced protein with tetratricopeptide repeats 3	Ifit3	NM_010501
160253_at	interferon induced transmembrane protein 3	Ifitm3	NM_025378
101014_at	interferon (alpha and beta) receptor 2	Ifnar2	NM_010509
104760_at	interferon-related developmental regulator 2	Ifrd2	NM_025903
95546_g_at	insulin-like growth factor 1	Igf1	NM_010512 /// NM_184052
98623_g_at	insulin-like growth factor 2	Igf2	NM_010514
97987_at	insulin-like growth factor binding protein, acid labile subunit	Igfals	NM_008340
99421_at	immunoglobulin heavy chain (V7183 family) /// similar to Ig heavy-chain V region precursor	Igh-V7183 /// LOC238412	XM_111356 /// XM_138299
102152_f_at	Immunoglobulin heavy chain (S107 family)	Igh-VS107	XM_354717
96975_at	Ig kappa chain	IgM	XM_355772
93604_f_at	immunoglobulin superfamily, member 4A	Igsf4a	NM_018770 /// NM_207675 /// NM_207676
93606_s_at	immunoglobulin superfamily, member 4A	Igsf4a	NM_018770 /// NM_207675 /// NM_207676
160820_at	immunoglobulin superfamily, member 8	Igsf8	NM_080419
160933_at	interferon gamma induced GTPase	Igtp	NM_018738
162092_f_at	inositol hexaphosphate kinase 1	Ihpk1	NM_013785
94244_at	inositol hexaphosphate kinase 1	Ihpk1	NM_013785
160397_at	IK cytokine	Ik	NM_011879
93874_s_at	interleukin 11 receptor, alpha chain 1 /// interleukin 11 receptor, alpha chain 2	Il11ra1 /// Il11ra2	NM_010549 /// NM_010550
103723_at	interleukin 13 receptor, alpha 1	Il13ra1	NM_133990
161023_at	interleukin 15 receptor, alpha chain	Il15ra	NM_008358 /// NM_133836
103486_at	interleukin 1 beta	Il1b	NM_008361
93914_at	interleukin 1 receptor, type I	Il1r1	NM_008362
102218_at	interleukin 6	Il6	NM_031168
94345_at	interleukin 6 signal transducer	Il6st	NM_010560
93823_at	interleukin enhancer binding factor 2	Ilf2	NM_026374
101499_at	integrin linked kinase	Ilk	NM_010562
96750_at	integrin-linked kinase-associated serine/threonine phosphatase 2C	Ilkap	NM_023343
161738_f_at	ilvB (bacterial acetolactate synthase)-like	Ilvbl	NM_173751
94428_at	ilvB (bacterial acetolactate synthase)-like	Ilvbl	NM_173751
100578_at	inosine 5'-phosphate dehydrogenase 2	Impdh2	NM_011830
93758_at	inner centromere protein	Incenp	NM_016692
102266_at	inhibin alpha	Inha	NM_010564
100277_at	inhibin beta-A	Inhba	NM_008380
94398_s_at	inositol polyphosphate-5-phosphatase B	Inpp5b	NM_008385
161849_r_at	insulin II	Ins2	NM_008387
98821_at	insulin promoter factor 1, homeodomain transcription factor	Ipf1	NM_008814
100465_i_at	IQ motif containing F4	Iqcf4	NM_026090
100466_f_at	IQ motif containing F4 /// gene model 1673, (NCBI)	Iqcf4 /// Gm1673	NM_026090 /// XM_358631
162425_f_at	interferon regulatory factor 3	Irf3	NM_016849
99103_at	interferon regulatory factor 3	Irf3	NM_016849
93425_at	interferon regulatory factor 5	Irf5	NM_012057
161699_i_at	interferon regulatory factor 6	Irf6	NM_016851 /// NM_178083
104669_at	interferon regulatory factor 7	Irf7	NM_016850
100990_g_at	integrin beta 1 binding protein 1	Itgb1bp1	NM_008403
100991_at	integrin beta 1 binding protein 1	Itgb1bp1	NM_008403
94826_at	integrin beta 4 binding protein	Itgb4bp	NM_010579
98467_at	inter alpha-trypsin inhibitor, heavy chain 4	Itih4	NM_018746
96283_at	integral membrane protein 2C	Itm2c	NM_022417
97302_at	influenza virus NS1A binding protein	Ivns1abp	NM_028582 /// NM_054102
92510_at	jagged 2	Jag2	NM_010588
98911_at	Janus kinase 1	Jak1	NM_146145
103310_at	jumonji, AT rich interactive domain 1B (Rbp2 like)	Jarid1b	NM_152895
95033_at	jumonji domain containing 1A	Jmjd1a	XM_194279
100130_at	Jun oncogene	Jun	NM_010591
102364_at	Jun proto-oncogene related gene d1	Jund1	NM_010592
96324_at	lysyl-tRNA synthetase	Kars	NM_053092
100961_at	potassium voltage-gated channel, subfamily H (eag-related), member 2	Kcnh2	NM_013569
97759_at	potassium large conductance calcium-activated channel, subfamily M, alpha member 1	Kcnma1	NM_010610
99449_at	potassium voltage-gated channel, subfamily Q, member 2	Kcnq2	NM_001003824 /// NM_001003825 /// NM_001006668 /// NM_001006669 /// NM_001006674 /// NM_001006675 /// NM_001006676 /// NM_001006677 /// NM_001006678 /// NM_001006679 /// NM_001006680 /// NM_010611
104464_s_at	KDEL (Lys-Asp-Glu-Leu) endoplasmic reticulum protein retention receptor 3	Kdelr3	NM_134090
99541_at	kinesin family member 11	Kif11	NM_010615
103998_at	kinesin family member 16B	Kif16b	XM_141392
160679_at	kinesin family member 1C	Kif1c	NM_153103
160501_at	kinesin family member 20A	Kif20a	NM_009004
161856_f_at	kinesin family member 20A	Kif20a	NM_009004
95118_r_at	kinesin family member 22	Kif22	NM_145588
96168_at	kinesin family member 23	Kif23	NM_024245
160755_at	kinesin family member 2C	Kif2c	NM_134471
93635_at	kinesin family member 3C	Kif3c	NM_008445
104644_at	kinesin family member 4	Kif4	NM_008446
98471_f_at	kinesin family member C1	Kifc1	NM_016761
100956_at	klotho	Kl	NM_013823
104293_at	kelch-like 21 (Drosophila)	Klhl21	XM_144142
95775_f_at	kallikrein 1	Klk1	NM_010645
100719_f_at	kallikrein 16	Klk16	NM_008454
101289_f_at	kallikrein 22	Klk22	NM_010114
102693_f_at	kallikrein 26	Klk26	NM_010644
104495_f_at	kallikrein 5	Klk5	NM_008456
161637_f_at	kallikrein 6 /// kallikrein 26 /// kallikrein 5	Klk6 /// Klk26 /// Klk5	NM_008456 /// NM_010639 /// NM_010644
104497_f_at	kallikrein 8	Klk8	NM_008457
94716_f_at	kallikrein 9 /// kallikrein 6 /// kallikrein 1 /// nerve growth factor, alpha /// RIKEN cDNA 1700127D06 gene	Klk9 /// Klk6 /// Klk1 /// Ngfa /// 1700127D06Rik	NM_010116 /// NM_010639 /// NM_010645 /// NM_010915 /// NM_029831
93441_at	kinetochore associated 2 /// RIKEN cDNA 2700099C18 gene /// similar to HEC protein; highly expressed in cancer, rich in leucine heptad repeats	Kntc2 /// 2700099C18Rik /// LOC385028	NM_023294 /// XM_358002
94270_at	keratin complex 1, acidic, gene 18	Krt1-18	NM_010664
101009_at	keratin complex 2, basic, gene 8	Krt2-8	NM_031170
97257_at	lactamase, beta 2	Lactb2	NM_145381
101359_at	laminin, beta 2	Lamb2	NM_008483
92759_at	laminin, beta 3	Lamb3	NM_008484
100428_at	laminin, gamma 2	Lamc2	NM_008485
103656_at	LanC (bacterial lantibiotic synthetase component C)-like 1	Lancl1	NM_021295
96876_at	lysosomal-associated protein transmembrane 4A	Laptm4a	NM_008640
93793_at	LIM and SH3 protein 1	Lasp1	NM_010688
101133_at	lipocalin 3	Lcn3	NM_010694
160613_at	lipocalin 7	Lcn7	NM_023476
160498_at	LIM domain binding 1	Ldb1	NM_010697
160832_at	Low density lipoprotein receptor	Ldlr	NM_010700
103628_at	lymphoid enhancer binding factor 1	Lef1	NM_010703
103629_g_at	lymphoid enhancer binding factor 1	Lef1	NM_010703
97366_at	LEM domain containing 2	Lemd2	NM_146075
97903_at	leukocyte receptor cluster (LRC) member 5	Leng5	NM_024168
97507_at	lectin, galactoside-binding, soluble, 3 binding protein	Lgals3bp	NM_011150
93261_at	legumain	Lgmn	NM_011175
102902_at	LIM homeobox protein 3	Lhx3	NM_010711
104658_at	leukemia inhibitory factor receptor	Lifr	NM_013584
104659_g_at	leukemia inhibitory factor receptor	Lifr	NM_013584
102888_s_at	LIM-domain containing, protein kinase	Limk1	NM_010717
103370_at	lin 7 homolog c (C. elegans)	Lin7c	NM_011699
161472_r_at	lectin, mannose-binding 2	Lman2	NM_025828
93993_at	lectin, mannose-binding 2	Lman2	NM_025828
98059_s_at	lamin A	Lmna	NM_001002011 /// NM_019390
98060_at	lamin A	Lmna	NM_001002011 /// NM_019390
102413_at	LIM domain only 1	Lmo1	NM_057173
96810_at	LIM domain only 2	Lmo2	NM_008505
93451_at	LIM domain only 7	Lmo7	XM_354836
102235_at	lung carcinoma myc related oncogene 1	Lmyc1	NM_008506
93939_at	linker of T-cell receptor pathways	Lnk	NM_008507
101214_f_at	similar to glyceraldehyde-3-phosphate dehydrogenase /// similar to glyceraldehyde-3-phosphate dehydrogenase /// similar to SUMO-1-specific protease /// glyceraldehyde-3-phosphate dehydrogenase	LOC14433 /// LOC380687 /// LOC380739 /// Gapd	NM_001001303 /// NM_001001978 /// NM_008084 /// XM_354654
103476_at	similar to Huntingtin interacting protein E; huntingtin interactor protein E	LOC231630	XM_149654
98369_f_at	similar to IgE-binding protein	LOC232532	XM_132963
93185_at	similar to SARG904	LOC239691	XM_155973
97570_at	similar to [Human Ig rearranged gamma chain mRNA, V-J-C region and complete cds.], gene product	LOC243461	XM_144837
103927_at	hypothetical LOC243905	LOC243905	XM_145503
101352_g_at	similar to putative pheromone receptor (Go-VN5)	LOC333201	XM_145559
96292_r_at	similar to NADH-ubiquinone oxidoreductase 13 kDa-A subunit, mitochondrial precursor (Complex I-13KD-A) (CI-13KD-A)	LOC380871	XM_354775
97936_at	similar to hypothetical protein FLJ31413	LOC386484	XM_359323
104231_at	similar to heterogeneous nuclear ribonucleoprotein H3 isoform a	LOC432467	XM_483910
97458_at	LOC433812	LOC433812	XM_489068
99824_at	similar to Protein phosphatase 2, regulatory subunit B (B56), alpha isoform	LOC434496	XM_486333
93447_at	similar to zinc finger protein 331; C2H2-like zinc finger protein; zinc finger protein 463	LOC435956	XM_488007
97358_at	Latrophilin 1	Lphn1	NM_181039
96806_at	lipin 2	Lpin2	NM_022882
95611_at	lipoprotein lipase	Lpl	NM_008509
96736_at	LIM domain containing preferred translocation partner in lipoma	Lpp	NM_178665
97420_at	leucine-rich alpha-2-glycoprotein 1	Lrg1	NM_029796
96186_at	low-density lipoprotein receptor-related protein 10	Lrp10	NM_022993
161392_f_at	leucine rich protein, B7 gene	Lrpb7	NM_013588
104212_at	leucine-rich PPR-motif containing	Lrpprc	NM_028233
94455_at	LSM3 homolog, U6 small nuclear RNA associated (S. cerevisiae)	Lsm3	NM_026309
93008_at	LSM4 homolog, U6 small nuclear RNA associated (S. cerevisiae)	Lsm4	NM_015816
97907_at	LSM7 homolog, U6 small nuclear RNA associated (S. cerevisiae)	Lsm7	NM_025349
100327_at	lymphotoxin A	Lta	NM_010735
100540_at	leukotriene A4 hydrolase	Lta4h	NM_008517
94791_s_at	leukocyte tyrosine kinase	Ltk	NM_008523 /// NM_203345 /// NM_206941 /// NM_206942
95004_at	Luc7 homolog (S. cerevisiae)-like	Luc7l	NM_025881 /// NM_028190
162041_f_at	lymphocyte antigen 64	Ly64	NM_010739
93078_at	lymphocyte antigen 6 complex, locus A	Ly6a	NM_010738
101488_r_at	Lymphocyte antigen 6 complex, locus E	Ly6e	NM_008529
99437_at	lymphocyte antigen 6 complex, locus F	Ly6f	NM_008530
161774_f_at	lysophospholipase 1	Lypla1	NM_008866
97207_f_at	lysophospholipase 1	Lypla1	NM_008866
92847_s_at	mannose-6-phosphate receptor, cation dependent	M6pr	NM_010749
99632_at	MAD2 (mitotic arrest deficient, homolog)-like 1 (yeast)	Mad2l1	NM_019499
95781_at	melanoma antigen, family B, 1 /// melanoma antigen, family B, 2 /// melanoma antigen, family B, 3	Mageb1 /// Mageb2 /// Mageb3	NM_008545 /// NM_010759 /// NM_031171
94289_r_at	melanoma antigen, family D, 2	Maged2	NM_030700
160550_i_at	mago-nashi homolog, proliferation-associated (Drosophila)	Magoh	NM_010760
97478_at	MAK10 homolog, amino-acid N-acetyltransferase subunit, (S. cerevisiae)	Mak10	NM_030153
104677_at	mannosidase, alpha, class 1B, member 1	Man1b1	XM_130073
99562_at	mannosidase 2, alpha B1	Man2b1	NM_010764
160287_at	microtubule-associated protein 1 light chain 3 beta	Map1lc3b	NM_026160
160288_at	microtubule-associated protein 1 light chain 3 beta	Map1lc3b	NM_026160
92585_at	mitogen activated protein kinase kinase 1	Map2k1	NM_008927
103020_s_at	mitogen activated protein kinase kinase kinase 1	Map3k1	NM_011945
92276_at	mitogen-activated protein kinase kinase kinase 6	Map3k6	NM_016693
160309_at	mitogen-activated protein kinase kinase kinase 7 interacting protein 2	Map3k7ip2	NM_138667
97106_at	mitogen activated protein kinase kinase kinase 8	Map3k8	NM_007746
102195_at	mitogen-activated protein kinase kinase kinase kinase 4	Map4k4	NM_008696
103416_at	mitogen-activated protein kinase 6	Mapk6	NM_015806
104047_at	mitogen activated protein kinase 8	Mapk8	NM_016700
104170_at	mitogen activated protein kinase 8 interacting protein 1	Mapk8ip1	NM_011162
104368_at	microtubule-associated protein, RP/EB family, member 3	Mapre3	NM_133350
96865_at	Myristoylated alanine rich protein kinase C substrate	Marcks	NM_008538
96138_at	methionine-tRNA synthetase	Mars	NM_001003913
160938_at	microtubule associated serine/threonine kinase 2	Mast2	NM_008641
104428_s_at	megakaryocyte-associated tyrosine kinase	Matk	NM_010768
96012_f_at	matrin 3	Matr3	NM_010771
96767_at	membrane bound C2 domain containing protein	Mbc2	NM_011843
95754_at	membrane-bound transcription factor protease, site 1	Mbtps1	NM_019709
99896_at	melanocortin 5 receptor	Mc5r	NM_013596
161951_f_at	mitochondrial carrier triple repeat 1	Mcart1	NM_001009949
97410_at	mitochondrial carrier triple repeat 1	Mcart1	NM_001009949
102022_at	Methylmalonyl CoA epimerase	Mcee	NM_028626
97451_at	multiple coagulation factor deficiency 2	Mcfd2	NM_139295 /// NM_176808
93093_at	myeloid cell leukemia sequence 1	Mcl1	NM_008562
103553_at	minichromosome maintenance deficient 10 (S. cerevisiae)	Mcm10	NM_027290
93112_at	minichromosome maintenance deficient 2 mitotin (S. cerevisiae)	Mcm2	NM_008564
100062_at	minichromosome maintenance deficient 3 (S. cerevisiae)	Mcm3	NM_008563
160496_s_at	minichromosome maintenance deficient 3 (S. cerevisiae)	Mcm3	NM_008563
100156_at	minichromosome maintenance deficient 5, cell division cycle 46 (S. cerevisiae)	Mcm5	NM_008566
103686_at	mucolipin 2	Mcoln2	NM_001005846 /// NM_026656
98563_f_at	Microspherule protein 1	Mcrs1	---
98110_at	transformed mouse 3T3 cell double minute 2	Mdm2	NM_010786
93339_at	transformed mouse 3T3 cell double minute 4	Mdm4	NM_008575
104730_at	midasin homolog (yeast)	Mdn1	XM_131338 /// XM_485364 /// XM_485365
94891_s_at	male enhanced antigen 1	Mea1	NM_010787
99465_at	methyl CpG binding protein 2	Mecp2	NM_010788
95044_at	mediator of RNA polymerase II transcription, subunit 28 homolog (yeast)	Med28	NM_025895
97282_at	melanoma antigen	Mela	NM_008581
162186_r_at	Meprin 1 beta	Mep1b	NM_008586
101095_at	microfibrillar-associated protein 2	Mfap2	NM_008546
92880_at	milk fat globule-EGF factor 8 protein	Mfge8	NM_008594
100508_at	manic fringe homolog (Drosophila)	Mfng	NM_008595
93767_i_at	similar to hypothetical protein FLJ10342	MGC90611	NM_001007589
104033_at	meningioma expressed antigen 6 (coiled-coil proline-rich)	Mgea6	NM_146034
102836_at	putative phosphatase	MGI:1194899	NM_008916
101530_at	U5 small nuclear ribonucleoprotein	MGI:1336880	NM_011431
103642_at	Ras-GTPase-activating protein SH3-domain binding protein	MGI:1351465	NM_013716
93633_at	guanine nucleotide exchange factor (RCC1 related)	MGI:1351630	NM_013789
93039_at	plasma glutamate carboxypeptidase	MGI:1889205	NM_018755 /// NM_176073
93885_g_at	endomucin	MGI:1891716	NM_016885
94997_at	endomucin	MGI:1891716	NM_016885
97228_at	leucine zipper domain protein	MGI:1913299	NM_133185
96935_at	membrane-associated protein 17	MGI:1914432	NM_026018
95102_at	scotin gene	MGI:1915044	NM_025858 /// NM_026381
104312_at	downregulated in Zic1 deficient cerebellum	MGI:1915894	NM_145919
93490_at	MAF1 homolog (yeast)	MGI:1916127	NM_026859
160337_at	myo-inositol 1-phosphate synthase A1	MGI:1919030	NM_023627
162401_f_at	myo-inositol 1-phosphate synthase A1	MGI:1919030	NM_023627
95497_at	timeless interacting protein	MGI:1921571	NM_025372
103254_at	FLN29 gene product	MGI:1923551	NM_172275
161576_f_at	FLN29 gene product	MGI:1923551	NM_172275
99452_at	liver-specific bHLH-Zip transcription factor	MGI:1927471	NM_017405
160360_at	selenoprotein	MGI:1927947	NM_053102
98021_at	RNA polymerase I associated factor	MGI:1929022	NM_022811
103385_at	teratocarcinoma expressed, serine rich	MGI:1929091	NM_019643
98513_at	G protein beta subunit-like	MGI:1929514	NM_019988
101094_at	hypoxia induced gene 1	MGI:1930666	NM_019814
100963_at	brain protein 17	MGI:1930773	NM_019999 /// NM_025580
160403_at	selenoprotein K	MGI:1931466	NM_019979
99164_at	mitogen activated protein binding protein interacting protein	MGI:1932697	NM_031248
103739_at	glucuronyl C5-epimerase	MGI:2136405	NM_033320
96900_at	Nur77 downstream gene 2	MGI:2143558	NM_175329
97511_at	monoglyceride lipase	Mgll	NM_011844
160435_at	MIC2 (monoclonal Imperial Cancer Research Fund 2)-like 1	Mic2l1	NM_138309
95135_at	Mid1 interacting protein 1 (gastrulation specific G12-like (zebrafish))	Mid1ip1	NM_026524
104410_at	midnolin	Midn	NM_021565
102340_at	myc induced nuclear antigen	Mina	NM_025910
100941_at	Msx-interacting-zinc finger	Miz1	NM_008602
99457_at	antigen identified by monoclonal antibody Ki 67	Mki67	XM_133912
104569_at	myeloid/lymphoid or mixed-lineage leukemia	Mll	XM_110671
96177_at	MMS19 (MET18 S. cerevisiae)-like	Mms19l	NM_028152
161557_at	menage a trois 1	Mnat1	NM_008612
98979_at	menage a trois 1	Mnat1	NM_008612
92300_at	max binding protein	Mnt	NM_010813
93715_at	myelin protein zero	Mpz	NM_008623
94376_s_at	meiotic recombination 11 homolog A (S. cerevisiae)	Mre11a	NM_018736
160431_at	mitochondrial ribosomal protein L12	Mrpl12	NM_027204
99140_at	mitochondrial ribosomal protein L16	Mrpl16	NM_025606
101097_at	mitochondrial ribosomal protein L21	Mrpl21	NM_172252
92646_at	mitochondrial ribosomal protein L23	Mrpl23	NM_011288
98120_at	mitochondrial ribosomal protein L27	Mrpl27	NM_053161
96652_at	mitochondrial ribosomal protein L28	Mrpl28	NM_024227
96082_at	mitochondrial ribosomal protein L30	Mrpl30	NM_027098
98904_at	mitochondrial ribosomal protein L35	Mrpl35	NM_025430
95736_at	mitochondrial ribosomal protein L4	Mrpl4	NM_023167
104567_at	mitochondrial ribosomal protein L46	Mrpl46	NM_023331
96059_at	mitochondrial ribosomal protein L48	Mrpl48	NM_026971 /// NM_198831
96861_at	mitochondrial ribosomal protein L50	Mrpl50	NM_178603
99630_at	mitochondrial ribosomal protein L54	Mrpl54	NM_025317
97251_at	mitochondrial ribosomal protein S10	Mrps10	NM_183086
95498_at	mitochondrial ribosomal protein S15	Mrps15	NM_025544
94327_at	mitochondrial ribosomal protein S18A	Mrps18a	NM_026768
95159_at	mitochondrial ribosomal protein S18B	Mrps18b	NM_025878
94912_at	mitochondrial ribosomal protein S21	Mrps21	NM_078479
101085_at	mitochondrial ribosomal protein S24	Mrps24	NM_026080
102128_f_at	mitochondrial ribosomal protein S25	Mrps25	NM_025578
96864_at	mitochondrial ribosomal protein S26	Mrps26	NM_207207
95730_at	mitochondrial ribosomal protein S34	Mrps34	NM_023260
96904_at	mitchondrial ribosomal protein S7	Mrps7	NM_025305
97112_at	MRV integration site 1	Mrvi1	NM_010826 /// NM_194464
162009_f_at	mutS homolog 2 (E. coli)	Msh2	NM_008628
102953_at	mesothelin	Msln	NM_018857
160308_at	moesin	Msn	NM_010833
93573_at	metallothionein 1	Mt1	NM_013602
101561_at	metallothionein 2	Mt2	NM_008630
92795_at	microtubule-associated protein 4	Mtap4	NM_008633
101855_at	microtubule-associated protein 6	Mtap6	NM_010837
95689_at	mitochondrial carrier homolog 1 (C. elegans)	Mtch1	NM_019880
160262_at	mitochondrial carrier homolog 2 (C. elegans)	Mtch2	NM_019758
103657_i_at	metal response element binding transcription factor 2	Mtf2	NM_013827
104427_at	myotubularin related protein 13	Mtmr13	XM_488538
160468_at	myotrophin	Mtpn	NM_008098
96718_at	mammary tumor virus receptor 2 /// Sjogren's syndrome/scleroderma autoantigen 1 homolog (human)	Mtvr2 /// Sssca1	NM_020491 /// NM_023166 /// NM_181452
161898_i_at	metaxin 1	Mtx1	NM_013604
102918_at	mucin 1, transmembrane	Muc1	NM_013605
160770_at	mevalonate (diphospho) decarboxylase	Mvd	NM_138656
95632_f_at	mevalonate kinase	Mvk	NM_023556
98417_at	myxovirus (influenza virus) resistance 1	Mx1	NM_010846
102699_at	myxovirus (influenza virus) resistance 2	Mx2	NM_013606
103237_at	Max dimerization protein 3	Mxd3	NM_016662
160138_at	Max interacting protein 1	Mxi1	NM_001008542 /// NM_001008543 /// NM_010847
160626_at	myelin basic protein expression factor 2, repressor	Myef2	NM_010852
93481_at	myosin, heavy polypeptide 14	Myh14	NM_028021
93482_at	myosin, light polypeptide kinase	Mylk	NM_139300
98968_at	myosin Va	Myo5a	NM_010864
92254_at	myosin Vb	Myo5b	NM_201600
162245_f_at	myosin VI	Myo6	NM_008662
101694_f_at	MYST histone acetyltransferase 2	Myst2	NM_177619
95347_at	myelin transcription factor 1	Myt1	NM_008665
98571_s_at	nascent polypeptide-associated complex alpha polypeptide	Naca	NM_013608
103637_at	N-acetyl galactosaminidase, alpha	Naga	NM_008669
97385_at	N-acetylglucosamine kinase	Nagk	NM_019542
93373_at	alpha-N-acetylglucosaminidase (Sanfilippo disease IIIB)	Naglu	NM_013792
104147_at	N-acetylneuraminic acid synthase (sialic acid synthase)	Nans	NM_053179
102819_at	nucleosome assembly protein 1-like 2	Nap1l2	NM_008671
95070_at	asparaginyl-tRNA synthetase	Nars	NM_027350
101108_at	nuclear autoantigenic sperm protein (histone-binding)	Nasp	NM_016777
104439_at	N-acetyltransferase 6	Nat6	NM_019750
96581_at	neural cell adhesion molecule 2	Ncam2	NM_010954
99633_at	neurochondrin	Ncdn	NM_011986
101536_at	nuclear receptor co-repressor 1	Ncor1	NM_011308
94910_at	nuclear distribution gene E homolog 1 (A nidulans)	Nde1	NM_023317
101059_at	necdin	Ndn	NM_010882
96596_at	N-myc downstream regulated gene 1 /// N-myc downstream regulated-like	Ndrg1 /// Ndrl	NM_008681 /// NM_010884
160819_at	N-myc downstream regulated gene 4	Ndrg4	NM_145602
161998_f_at	N-myc downstream regulated gene 4	Ndrg4	NM_145602
160464_s_at	N-myc downstream regulated-like	Ndrl	NM_008681
92400_at	N-deacetylase/N-sulfotransferase (heparan glucosaminyl) 2	Ndst2	NM_010811
160237_at	NADH dehydrogenase (ubiquinone) 1 alpha subcomplex, 6 (B14)	Ndufa6	NM_025987
95652_at	NADH dehydrogenase (ubiquinone) 1 alpha subcomplex, 7 (B14.5a)	Ndufa7	NM_023202
93531_at	NADH dehydrogenase (ubiquinone) 1 alpha subcomplex, 8	Ndufa8	NM_026703
96321_at	NADH dehydrogenase (ubiquinone) 1 alpha subcomplex, 9	Ndufa9	NM_025358
161122_f_at	NADH dehydrogenase (ubiquinone) 1, alpha/beta subcomplex, 1	Ndufab1	NM_028177
96909_at	NADH dehydrogenase (ubiquinone) 1, alpha/beta subcomplex, 1	Ndufab1	NM_028177
95131_f_at	NADH dehydrogenase (ubiquinone) 1 beta subcomplex, 2	Ndufb2	NM_026612
95132_r_at	NADH dehydrogenase (ubiquinone) 1 beta subcomplex, 2	Ndufb2	NM_026612
94541_at	NADH dehydrogenase (ubiquinone) 1 beta subcomplex 4	Ndufb4	NM_026610
93581_at	NADH dehydrogenase (ubiquinone) 1 beta subcomplex 8	Ndufb8	NM_026061
100079_at	NADH dehydrogenase (ubiquinone) 1 beta subcomplex, 9	Ndufb9	NM_023172
93972_at	NADH dehydrogenase (ubiquinone) Fe-S protein 2	Ndufs2	NM_153064
96899_at	NADH dehydrogenase (ubiquinone) Fe-S protein 3	Ndufs3	NM_026688
99593_at	NADH dehydrogenase (ubiquinone) Fe-S protein 5	Ndufs5	NM_134104
96267_at	NADH dehydrogenase (ubiquinone) flavoprotein 1	Ndufv1	NM_133666
162327_f_at	NADH dehydrogenase (ubiquinone) flavoprotein 2	Ndufv2	XM_128725
94062_at	NADH dehydrogenase (ubiquinone) flavoprotein 2	Ndufv2	XM_128725
93519_s_at	neural precursor cell expressed, developmentally down-regulated gene 8	Nedd8	NM_008683
100885_at	NIMA (never in mitosis gene a)-related expressed kinase 2	Nek2	NM_010892
161829_at	nestin	Nes	NM_016701
94223_at	neuroepithelial cell transforming gene 1	Net1	NM_019671
101546_at	Neuraminidase 1	Neu1	NM_010893
92562_at	nuclear factor, erythroid derived 2, like 2	Nfe2l2	NM_010902
98427_s_at	nuclear factor of kappa light chain gene enhancer in B-cells 1, p105	Nfkb1	NM_008689
102059_at	nicolin 1	Nicn1	NM_025449
93563_s_at	nidogen 2	Nid2	NM_008695
93318_at	ninjurin 1	Ninj1	NM_013610
160075_at	nitrilase 1	Nit1	NM_012049
92584_at	NFKB inhibitor interacting Ras-like protein 2	Nkiras2	NM_028024
92747_at	NK2 transcription factor related, locus 2 (Drosophila)	Nkx2-2	NM_010919
93741_at	NMD3 homolog (S. cerevisiae)	Nmd3	NM_133787
92794_f_at	expressed in non-metastatic cells 1, protein	Nme1	NM_008704
92625_at	expressed in non-metastatic cells 2, protein	Nme2	NM_008705
98604_at	novel nuclear protein 1	Nnp1	NM_010925
96804_at	nucleolar protein 1	Nol1	NM_138747
92569_f_at	nucleolar protein 5	Nol5	NM_018868
95109_at	nucleolar protein 5A	Nol5a	NM_024193
97824_at	nucleolar protein family A, member 2	Nola2	NM_026631
162204_r_at	Notch gene homolog 1 (Drosophila)	Notch1	NM_008714
97497_at	Notch gene homolog 1 (Drosophila)	Notch1	NM_008714
92956_at	Notch gene homolog 3 (Drosophila)	Notch3	NM_008716
96887_at	nuclear protein 15.6	Np15	NM_019435
160344_at	Niemann Pick type C2	Npc2	NM_023409
96259_at	aminopeptidase puromycin sensitive	Npepps	NM_008942
101634_at	nucleophosmin 1	Npm1	NM_008722
102796_at	nucleoplasmin 3	Npm3	NM_008723
102780_at	neoplastic progression 3	Npn3	NM_029688
94350_f_at	NAD(P)H dehydrogenase, quinone 1	Nqo1	NM_008706
94351_r_at	NAD(P)H dehydrogenase, quinone 1	Nqo1	NM_008706
104381_at	nuclear receptor subfamily 1, group H, member 3	Nr1h3	NM_013839
102371_at	nuclear receptor subfamily 4, group A, member 1	Nr4a1	NM_010444
100701_r_at	nuclear receptor subfamily 5, group A, member 1	Nr5a1	NM_139051
94362_at	neuroblastoma ras oncogene	Nras	NM_010937
160798_at	nuclear receptor binding factor 1	Nrbf1	NM_025297
95016_at	neuropilin 1	Nrp1	NM_008737
93673_at	neurturin	Nrtn	NM_008738
93868_at	NAD(P) dependent steroid dehydrogenase-like	Nsdhl	NM_010941
93740_at	nuclease sensitive element binding protein 1	Nsep1	NM_011732
101099_at	neuron specific gene family member 1	Nsg1	NM_010942
100057_at	non-SMC element 1 homolog (S. cerevisiae)	Nsmce1	NM_026330
94450_at	NOL1/NOP2/Sun domain family 2	Nsun2	NM_145354
94451_at	NOL1/NOP2/Sun domain family 2	Nsun2	NM_145354
94452_g_at	NOL1/NOP2/Sun domain family 2	Nsun2	NM_145354
92420_at	neurotrophin 3	Ntf3	NM_008742
94528_at	nucleotide binding protein 1	Nubp1	NM_011955
102197_at	nucleobindin 2	Nucb2	NM_016773
94372_at	nudix (nucleoside diphosphate linked moiety X)-type motif 1	Nudt1	NM_008637
101380_at	nudix (nucleoside diphosphate linked moiety X)-type motif 14	Nudt14	NM_025399
160188_at	nudix (nucleoside diphosphate linked moiety X)-type motif 4	Nudt4	NM_027722
102412_at	nucleoporin 107	Nup107	NM_134010
92840_at	nucleoporin 54	Nup54	NM_183392
160108_at	nuclear protein 1	Nupr1	NM_019738
161000_i_at	nucleolar and spindle associated protein 1	Nusap1	NM_133851
101366_f_at	nuclear VCP-like	Nvl	NM_026171
160084_at	ornithine decarboxylase, structural 1	Odc1	NM_013614
160970_at	outer dense fiber of sperm tails 2	Odf2	NM_013615
96879_at	oxoglutarate dehydrogenase (lipoamide)	Ogdh	NM_010956
94818_at	O-linked N-acetylglucosamine (GlcNAc) transferase (UDP-N-acetylglucosamine:polypeptide-N-acetylglucosaminyl transferase)	Ogt	NM_139144
97000_s_at	olfactory receptor 156 /// olfactory receptor 157	Olfr156 /// Olfr157	NM_019474 /// NM_019475
102554_at	olfactory receptor 16	Olfr16	NM_008763
104474_s_at	opioid receptor-like 1	Oprl1	NM_011012
160838_at	origin recognition complex, subunit 2-like (S. cerevisiae)	Orc2l	NM_008765
95712_at	origin recognition complex, subunit 6-like (S. cerevisiae)	Orc6l	NM_019716
95477_at	open reading frame 18	ORF18	NM_029565
160193_at	ORM1-like 2 (S. cerevisiae)	Ormdl2	NM_024180
102255_at	oncostatin M receptor	Osmr	NM_011019
92845_at	3-oxoacid CoA transferase 1	Oxct1	NM_024188
93108_at	prolyl 4-hydroxylase, beta polypeptide	P4hb	NM_011032
160634_at	Park2 co-regulated	Pacrg	XM_128418
104648_at	phosphofurin acidic cluster sorting protein 1	Pacs1	NM_153129
92949_at	protein kinase C and casein kinase substrate in neurons 1	Pacsin1	NM_011861 /// NM_178365
104138_at	platelet-activating factor acetylhydrolase 2	Pafah2	NM_133880
95470_at	PAK1 interacting protein 1	Pak1ip1	NM_026550
98454_at	paralemmin	Palm	NM_023128
100496_at	peptidylglycine alpha-amidating monooxygenase	Pam	NM_013626
93298_at	3'-phosphoadenosine 5'-phosphosulfate synthase 1	Papss1	NM_011863
92423_at	par-6 (partitioning defective 6,) homolog alpha (C. elegans)	Pard6a	NM_019695
100903_at	poly (ADP-ribose) polymerase family, member 2	Parp2	NM_009632
103338_at	poly (ADP-ribose) polymerase family, member 6	Parp6	XM_134863
103314_at	poly (ADP-ribose) polymerase family, member 8	Parp8	NM_027272
162299_f_at	phosphatidylethanolamine binding protein	Pbp	NM_018858
94803_at	pre B-cell leukemia transcription factor 1	Pbx1	NM_008783 /// NM_183355
94804_at	pre B-cell leukemia transcription factor 1	Pbx1	NM_008783 /// NM_183355
101382_at	pre B-cell leukemia transcription factor 2	Pbx2	NM_017463
101769_at	protocadherin alpha 10	Pcdha10	NM_009961
97398_at	phosphoenolpyruvate carboxykinase 2 (mitochondrial)	Pck2	NM_028994
97753_at	piccolo (presynaptic cytomatrix protein)	Pclo	NM_011995
94348_f_at	Protein-L-isoaspartate (D-aspartate) O-methyltransferase 1	Pcmt1	NM_008786
101065_at	proliferating cell nuclear antigen	Pcna	NM_011045
99662_at	pericentrin 1	Pcnt1	NM_001002929
99663_g_at	pericentrin 1	Pcnt1	NM_001002929
102296_at	proprotein convertase subtilisin/kexin type 2	Pcsk2	NM_008792
104674_s_at	proprotein convertase subtilisin/kexin type 4	Pcsk4	NM_008793
96128_at	PCTAIRE-motif protein kinase 3	Pctk3	NM_008795
162288_f_at	pyruvate carboxylase	Pcx	NM_008797
93308_s_at	pyruvate carboxylase	Pcx	NM_008797
103914_at	phosphate cytidylyltransferase 2, ethanolamine	Pcyt2	NM_024229
104080_at	PDGFA associated protein 1	Pdap1	XM_132501
95040_at	programmed cell death 6 interacting protein	Pdcd6ip	NM_011052
96858_at	programmed cell death 8	Pdcd8	NM_012019
93382_at	phosphodiesterase 1B, Ca2+-calmodulin dependent	Pde1b	NM_008800
94932_at	platelet derived growth factor, alpha	Pdgfa	NM_008808
95079_at	platelet derived growth factor receptor, alpha polypeptide	Pdgfra	NM_011058
100977_at	pyruvate dehydrogenase kinase, isoenzyme 1	Pdk1	NM_172665
92810_at	pyruvate dehydrogenase kinase, isoenzyme 3	Pdk3	NM_145630
102049_at	pyruvate dehydrogenase kinase, isoenzyme 4	Pdk4	NM_013743
100554_at	PDZ and LIM domain 1 (elfin)	Pdlim1	NM_016861
92806_at	p53 and DNA damage regulated 1	Pdrg1	NM_178939
96519_at	pyridoxal (pyridoxine, vitamin B6) kinase	Pdxk	NM_172134
99156_at	PDZ domain containing 11	Pdzk11	NM_028303
97830_at	platelet/endothelial cell adhesion molecule 1	Pecam1	NM_008816
96765_at	Paternally expressed 3	Peg3	NM_001010988 /// NM_008817
94505_at	pellino 1	Peli1	NM_023324 /// NM_030015
98017_at	pelota homolog (Drosophila)	Pelo	NM_134058
101368_at	placentae and embryos oncofetal gene	Pem	NM_008818
97825_at	PERP, TP53 apoptosis effector	Perp	NM_022032
160788_at	pescadillo homolog 1, containing BRCT domain (zebrafish)	Pes1	NM_022889
100027_s_at	peroxisomal biogenesis factor 14	Pex14	NM_019781
94438_at	phosphofructokinase, muscle	Pfkm	NM_021514
97833_at	phosphofructokinase, platelet	Pfkp	NM_019703
97834_g_at	phosphofructokinase, platelet	Pfkp	NM_019703
92909_at	placental growth factor	Pgf	NM_008827
95147_at	6-phosphogluconolactonase	Pgls	NM_025396
162475_f_at	peptidoglycan recognition protein 1	Pglyrp1	NM_009402
161447_f_at	progesterone receptor membrane component 2	Pgrmc2	XM_130859
94855_at	prohibitin	Phb	NM_008831
100992_at	polyhomeotic-like 1 (Drosophila)	Phc1	NM_007905
103387_at	PHD finger protein 1	Phf1	NM_009343
96741_at	PHD finger protein 12	Phf12	NM_174852
161064_f_at	PHD finger protein 7	Phf7	NM_027949
98056_at	pleckstrin homology-like domain, family A, member 3	Phlda3	NM_013750
96206_at	pleckstrin homology-like domain, family B, member 1	Phldb1	NM_153537
160123_at	Phosphohistidine phosphatase 1	Phpt1	NM_029293
93424_at	pam, highwire, rpm 1	Phr1	NM_207215
104491_at	putative homeodomain transcription factor 2	Phtf2	NM_172992
101732_at	per-hexamer repeat gene 5	Phxr5	NM_008836
160615_at	protein inhibitor of activated STAT 3	Pias3	NM_018812 /// NM_146135
161994_f_at	protein inhibitor of activated STAT 3	Pias3	NM_018812 /// NM_146135
103732_at	phosphatidylinositol (4,5) bisphosphate 5-phosphatase, A	Pib5pa	NM_172439
161433_f_at	phosphatidylinositol glycan, class A	Piga	NM_011081
92304_at	phosphatidylinositol glycan, class A	Piga	NM_011081
100594_at	phosphatidylinositol glycan, class Q	Pigq	NM_011822
99926_at	polymeric immunoglobulin receptor	Pigr	NM_011082
104699_at	phosphoinositide-3-kinase, class 3	Pik3c3	NM_181414
102759_at	phosphatidylinositol 3-kinase, regulatory subunit, polypeptide 2 (p85 beta)	Pik3r2	NM_008841
101926_at	proviral integration site 2	Pim2	NM_138606 /// NM_145736 /// NM_145737
103573_at	phosphatidylinositol-4-phosphate 5-kinase, type 1 alpha	Pip5k1a	NM_008846
98003_at	paired-Ig-like receptor B	Pirb	NM_011095
98005_at	protein kinase inhibitor, alpha	Pkia	NM_008862
101471_at	pyruvate kinase liver and red blood cell	Pklr	NM_013631
162032_f_at	pyruvate kinase, muscle	Pkm2	NM_011099
97965_at	phospholipase A2, group VI	Pla2g6	NM_016915
100607_at	phospholipase D3	Pld3	NM_011116
103551_at	pleckstrin homology domain containing, family A member 5	Plekha5	NM_144920
101350_g_at	polo-like kinase 1 (Drosophila)	Plk1	NM_011121
161292_f_at	polo-like kinase 1 (Drosophila)	Plk1	NM_011121
93099_f_at	polo-like kinase 1 (Drosophila)	Plk1	NM_011121
98996_at	polo-like kinase 4 (Drosophila)	Plk4	NM_011495 /// NM_173169
101064_at	pleiotropic regulator 1, PRL1 homolog (Arabidopsis)	Plrg1	NM_016784
102839_at	phospholipid scramblase 1	Plscr1	NM_011636
95368_at	plexin A2	Plxna2	NM_008882
160311_at	plexin B2	Plxnb2	XM_484491
93360_at	phosphomannomutase 1	Pmm1	NM_013872
104454_at	postmeiotic segregation increased 2 (S. cerevisiae)	Pms2	NM_008886
93910_at	pregnancy upregulated non-ubiquitously expressed CaM kinase	Pnck	NM_012040
160070_at	pancreatic lipase-related protein 2	Pnliprp2	NM_011128
99194_at	polyribonucleotide nucleotidyltransferase 1	Pnpt1	NM_027869
97224_at	proline-rich nuclear receptor coactivator 1	Pnrc1	XM_131355
95059_at	proline-rich nuclear receptor coactivator 2	Pnrc2	NM_026383
98006_at	polymerase (DNA directed), alpha 2	Pola2	NM_008893
96217_at	polymerase (DNA directed), beta	Polb	NM_011130
103057_at	polymerase (DNA directed), delta 1, catalytic subunit	Pold1	NM_011131
98155_r_at	polymerase (DNA directed), delta 2, regulatory subunit	Pold2	NM_008894
103428_at	polymerase (DNA-directed), delta 3, accessory subunit	Pold3	NM_133692
162185_i_at	polymerase (DNA-directed), delta interacting protein 3	Poldip3	NM_178627
100408_at	polymerase (DNA directed), epsilon 3 (p17 subunit)	Pole3	NM_021498
93699_at	polymerase (DNA directed), gamma 2, accessory subunit	Polg2	NM_015810
162307_at	polymerase (DNA directed), kappa	Polk	NM_012048
97315_at	polymerase (RNA) II (DNA directed) polypeptide D	Polr2d	NM_027002 /// NM_027101
92804_at	polymerase (RNA) II (DNA directed) polypeptide H	Polr2h	NM_145632
100461_at	polymerase (RNA) II (DNA directed) polypeptide J	Polr2j	NM_011293
93551_at	Polymerase (RNA) II (DNA directed) polypeptide L	Polr2l	---
94026_at	pro-opiomelanocortin-alpha	Pomc1	NM_008895
92593_at	periostin, osteoblast specific factor	Postn	NM_015784
160802_at	peter pan homolog (Drosophila)	Ppan	NM_145610
98508_s_at	phosphatidic acid phosphatase 2a	Ppap2a	NM_008247 /// NM_008903
94915_at	peptidylprolyl isomerase B	Ppib	NM_011149
95112_f_at	peptidylprolyl isomerase (cyclophilin)-like 2	Ppil2	NM_144954
102223_at	periplakin	Ppl	NM_008909
101836_at	protein phosphatase 1B, magnesium dependent, beta isoform	Ppm1b	NM_011151
101837_g_at	protein phosphatase 1B, magnesium dependent, beta isoform	Ppm1b	NM_011151
101838_r_at	protein phosphatase 1B, magnesium dependent, beta isoform	Ppm1b	NM_011151
92879_at	protein phosphatase 1G (formerly 2C), magnesium-dependent, gamma isoform	Ppm1g	NM_008014
160078_at	protein phosphatase 1, regulatory (inhibitor) subunit 14B	Ppp1r14b	NM_008889
96114_at	protein phosphatase 1, regulatory (inhibitor) subunit 1A	Ppp1r1a	NM_021391
92573_at	protein phosphatase 2 (formerly 2A), regulatory subunit A (PR 65), alpha isoform	Ppp2r1a	NM_016891
93762_at	protein phosphatase 2A, regulatory subunit B (PR 53)	Ppp2r4	NM_138748
104610_at	peroxisome proliferative activated receptor, gamma, coactivator-related 1	Pprc1	XM_358330 /// XM_359412
95032_at	protein regulator of cytokinesis 1	Prc1	NM_145150
100331_g_at	peroxiredoxin 2	Prdx2	NM_011563
99608_at	peroxiredoxin 2	Prdx2	NM_011563
93495_at	peroxiredoxin 4	Prdx4	NM_016764
96956_at	peroxiredoxin 5	Prdx5	NM_012021
100622_at	peroxiredoxin 6	Prdx6	NM_007453
96772_at	DNA primase, p49 subunit	Prim1	NM_008921
103559_at	protein kinase, cAMP dependent, catalytic, alpha	Prkaca	NM_008854
96852_at	protein kinase, cAMP dependent regulatory, type I, alpha	Prkar1a	NM_021880
94944_at	protein kinase, cAMP dependent regulatory, type I beta	Prkar1b	NM_008923
97684_at	protein kinase C, alpha binding protein	Prkcabp	NM_008837
94087_at	protein kinase C, mu	Prkcm	NM_008858
96198_at	protein kinase C, zeta	Prkcz	NM_008860
93476_at	protein kinase, DNA activated, catalytic polypeptide	Prkdc	NM_011159
100606_at	prion protein	Prnp	NM_011170
93389_at	prominin 1	Prom1	NM_008935
93390_g_at	prominin 1	Prom1	NM_008935
93651_r_at	proline rich protein 2	Prp2	NM_031499
95496_at	phosphoribosyl pyrophosphate synthetase-associated protein 1	Prpsap1	XM_181343
162142_f_at	proline-rich Gla (G-carboxyglutamic acid) polypeptide 2	Prrg2	NM_022999
94924_at	proline-rich Gla (G-carboxyglutamic acid) polypeptide 2	Prrg2	NM_022999
99327_at	protease, serine, 19 (neuropsin)	Prss19	NM_008940
92873_f_at	protease, serine, 2	Prss2	NM_009430
104102_at	protease, serine, 25	Prss25	NM_019752
162205_f_at	protease, serine, 32	Prss32	NM_027220
102807_at	prune homolog (Drosophila)	Prune	NM_173347
97114_at	prosaposin	Psap	NM_011179
96295_at	phosphoserine aminotransferase 1	Psat1	NM_177420
93492_at	pleckstrin homology, Sec7 and coiled-coil domains 2	Pscd2	NM_011181
103433_at	pleckstrin homology, Sec7 and coiled-coil domains 3	Pscd3	NM_011182
102201_s_at	presenilin 1	Psen1	NM_008943
99930_s_at	presenilin 2	Psen2	NM_011183
100733_at	proteasome (prosome, macropain) subunit, alpha type 2	Psma2	NM_008944
94841_at	proteasome (prosome, macropain) subunit, alpha type 5	Psma5	NM_011967
160875_at	Proteasome (prosome, macropain) subunit, beta type 1	Psmb1	NM_011185
98113_at	proteasome (prosome, macropain) subunit, beta type 1	Psmb1	NM_011185
94219_at	proteasome (prosome, macropain) subunit, beta type 2	Psmb2	NM_011970
94025_at	proteasome (prosome, macropain) subunit, beta type 3	Psmb3	NM_011971
98557_f_at	proteasome (prosome, macropain) subunit, beta type 4	Psmb4	NM_008945
101558_s_at	proteasome (prosome, macropain) subunit, beta type 5	Psmb5	NM_011186
101992_at	proteasome (prosome, macropain) subunit, beta type 6	Psmb6	NM_008946
160152_at	protease (prosome, macropain) 26S subunit, ATPase 1	Psmc1	NM_008947
93735_f_at	proteasome (prosome, macropain) 26S subunit, ATPase 3	Psmc3	NM_008948
93310_at	proteasome (prosome, macropain) 26S subunit, ATPase, 6	Psmc6	NM_025959
95742_at	proteasome (prosome, macropain) 26S subunit, non-ATPase, 13	Psmd13	NM_011875
92769_at	proteasome (prosome, macropain) 26S subunit, non-ATPase, 3	Psmd3	NM_009439
101510_at	proteasome (prosome, macropain) 28 subunit, alpha	Psme1	NM_011189
103393_at	paraspeckle protein 1	Pspc1	NM_025682
92589_at	phosphoserine phosphatase	Psph	NM_133900
101931_at	phosphatidylserine synthase 1	Ptdss1	NM_008959
161864_f_at	phosphatidylserine synthase 1	Ptdss1	NM_008959
160765_at	prostaglandin E synthase 2	Ptges2	NM_133783
103451_at	PTK2 protein tyrosine kinase 2 beta	Ptk2b	NM_172498
100718_at	prothymosin alpha	Ptma	NM_008972
94489_at	protein tyrosine phosphatase 4a1	Ptp4a1	NM_011200
94929_at	protein tyrosine phosphatase, non-receptor type 1	Ptpn1	NM_011201
102840_at	protein tyrosine phosphatase, non-receptor type 12	Ptpn12	NM_011203
100976_at	protein tyrosine phosphatase, non-receptor type 9	Ptpn9	NM_019651
96272_at	protein tyrosine phosphatase, receptor type, F	Ptprf	NM_011213
104422_at	protein tyrosine phosphatase, receptor type, N	Ptprn	NM_008985
99933_at	poliovirus receptor-related 2	Pvrl2	NM_008990
97325_at	PX domain containing serine/threonine kinase	Pxk	NM_145458
103047_at	peroxisomal membrane protein 3	Pxmp3	NM_008994
104339_at	pygopus 2	Pygo2	XM_130932
96603_at	quiescin Q6	Qscn6	NM_023268
161063_r_at	Expressed sequence R74740	R74740	---
92882_at	RAB1, member RAS oncogene family	Rab1	NM_008996
101933_at	RAB10, member RAS oncogene family	Rab10	NM_016676
98150_at	RAB11B, member RAS oncogene family	Rab11b	NM_008997
93347_at	RAB24, member RAS oncogene family	Rab24	NM_009000
103224_at	RAB33A, member of RAS oncogene family	Rab33a	NM_011228
103062_at	RAB33B, member of RAS oncogene family	Rab33b	NM_016858
160317_at	RAB34, member of RAS oncogene family	Rab34	NM_033475
161790_at	RAB3A, member RAS oncogene family	Rab3a	NM_009001
95539_at	RAB3A interacting protein	Rab3ip	NM_001003950
101921_at	RAB4A, member RAS oncogene family	Rab4a	NM_009003
99587_at	RAB7, member RAS oncogene family	Rab7	NM_009005
101555_at	RAS-related C3 botulinum substrate 1	Rac1	NM_009007
94953_at	Rac GTPase-activating protein 1	Racgap1	NM_012025
103840_at	RAD17 homolog (S. pombe)	Rad17	NM_011233
94768_at	RAD21 homolog (S. pombe)	Rad21	NM_009009
96103_f_at	RAD23b homolog (S. cerevisiae)	Rad23b	NM_009011
104527_at	RAD51 homolog (S. cerevisiae)	Rad51	NM_011234
95953_at	RAD51-like 1 (S. cerevisiae)	Rad51l1	NM_009014
102878_at	RAD52 homolog (S. cerevisiae)	Rad52	NM_011236
160466_at	RAE1 RNA export 1 homolog (S. pombe)	Rae1	NM_175112
93399_at	retinoic acid induced 2	Rai2	NM_198409
103067_at	v-ral simian leukemia viral oncogene homolog A (ras related)	Rala	NM_019491
100530_at	ral guanine nucleotide dissociation stimulator	Ralgds	NM_009058
98511_at	hnRNP-associated with lethal yellow	Raly	NM_023130
104680_at	receptor (calcitonin) activity modifying protein 1	Ramp1	NM_016894
92368_at	receptor (calcitonin) activity modifying protein 3	Ramp3	NM_019511
102821_s_at	RAN, member RAS oncogene family /// RAS-like, family 2, locus 9	Ran /// Rasl2-9	NM_009028 /// NM_009391
99523_at	RAN binding protein 10	Ranbp10	NM_145824
161757_f_at	RAN binding protein 5	Ranbp5	NM_023579
93070_at	RAN binding protein 5	Ranbp5	NM_023579
100048_at	RAS-related protein-1a	Rap1a	NM_145541
93319_at	RAS p21 protein activator 3	Rasa3	NM_009025
92417_at	RAS protein activator like 1 (GAP1 like)	Rasal1	NM_013832
104146_at	Ras interacting protein 1	Rasip1	XM_485931
97948_at	retinoblastoma 1	Rb1	NM_009029
92647_at	retinoblastoma binding protein 4	Rbbp4	NM_009030
161760_s_at	retinoblastoma binding protein 6	Rbbp6	NM_011247 /// NM_175023
95910_f_at	RNA binding motif and ELMO domain 1	Rbed1	NM_144917
104476_at	retinoblastoma-like 1 (p107)	Rbl1	NM_011249
95617_at	retinoblastoma-like 2	Rbl2	NM_011250
97293_at	RNA binding motif protein 10	Rbm10	NM_145627
100138_f_at	RNA binding motif protein 14	Rbm14	NM_019869
96041_at	RNA binding motif protein 3	Rbm3	NM_016809
97254_at	RNA binding motif protein 8a	Rbm8a	NM_025875
104197_at	RNA binding motif protein 9	Rbm9	NM_053104 /// NM_175387
102399_at	RNA binding protein gene with multiple splicing	Rbpms	NM_019733
103888_at	RNA binding protein gene with multiple splicing	Rbpms	NM_019733
98335_at	replication factor C 1	Recc1	NM_011258
103804_at	reversion-inducing-cysteine-rich protein with kazal motifs	Reck	NM_016678
162312_f_at	regenerating islet-derived 1	Reg1	NM_009042
98480_s_at	renin 1 structural /// renin 2 tandem duplication of Ren1	Ren1 /// Ren2	NM_031192 /// NM_031193
160759_at	replication factor C (activator 1) 2	Rfc2	NM_020022
160072_at	replication factor C (activator 1) 3	Rfc3	XM_132528
103418_at	replication factor C (activator 1) 4	Rfc4	NM_145480
95612_at	replication factor C (activator 1) 5	Rfc5	XM_132348
102219_at	regulatory factor X, 2 (influences HLA class II expression)	Rfx2	NM_009056
93766_at	regucalcin	Rgn	NM_009060
102650_at	regulator of G-protein signaling 11	Rgs11	XM_128488
94378_at	regulator of G-protein signaling 16	Rgs16	NM_011267
103605_g_at	regulator of G-protein signaling 19	Rgs19	NM_026446
[truncated: 534 more rows]

## Sheet: Table 3_Myc targets
Supplementary Table 3.IN VIVO MYC TARGETS THAT ARE INCLUDED IN MYC-TARGET GENE DATABASE*
Function**	Induced—Kinetic profile (1) 1	Induced—Kinetic profile (2) 2	Repressed—Kinetic profile (3) 3	Repressed—Kinetic Profile (4) 4
Adhesion	Cdc47	Muc1	Cmas
Apoptosis	Casp8ap2, Mcl1		Pdcd8, Phb, Psen2	Vdac2
Cell cycle	Ccna2, Ccng2, Cdc25c, Cdc6, Cdkn1a, Cks2, Mad2l1, Pcna, Ptma, Rb1	Ccnd1, E2f1	Cdc2l1, Ddit3	Cdkn2b
Chaperones	Bcap37, Cct8, Hspa4, Hspcb	Tra1	Cct3, Dnajb1	Cln3
Chromatin	H2afx, H2afz, Rad51, Rfc2	Pole3
Cytoskeleton	Actg1, Lmna, Stmn1	Msn	Spg4
DNA repair	Brca2	Prkdc	Ddb1, Polb
DNA replication	Mcm3, Mcm5, Pola2, Pold1
Growth arrest			Gadd45g	Gadd45a
Ligand/receptor	Chrnb1, Fgfr4, Ifrd2, Pdgfra	M6pr	Bsg
Membrane protein			Tmem4	Syngr1
Metabolism	Acadm, Adk, Ahcy, Ak2, Bckdha, Brca1, Crat, Ctps, Dpm1, Eno1, Etfa, Fabp5, Gclc, Lta4h, Msh2, Pd3, Pfkm, Prdx4, Rfc4, Shmt1, Umpk, Ywhah	Acp5, Aldh2, Aldh9a1, Alg5, Apex1, Dhodh, Exosc7, Fasn, Fpgs, Gart, Mt1, Odc1, Pkm2, Pold2, Ptdss1, Srm	Acox1, Ecgf1, Fah, Frda, Hmbs, Idh2, Impdh2, Nme2, Psap	Urod
Mitochondrion	Timm8a, Uqcrc2	Ndufv1, Nme1
Not specified	Ap4s1, Birc6, Calm2, Gdap1, Gmip, Ifi30, Kif20a, Ndufa6, Ndufb4, Bubp1, Nup54, Pdk1, Prdx5, Pscd2, Rab1, Rbl1, Sugt1, Ube2l3	Atp5c1, Atp5e, Ifi35, Lisch7, Naca, Ndufb2, Scamp3, Snx5, Srp68, Vdac3, Zdhhc3	Arfrp1, Armet, Bckdhb, Coil, Fkbp11, Hbxip, Ilk, Pla2g6, Supt5h, TagIn2	Hdac6, Leng5, Naga, Sgpl1, Ttc4
Nucleolus	Ebna1bp2, Grsf1, Hnrpdl, Nol1, Rbm3, Rpp30, Slbp	Fbl, Zfp3612
Oncogene or tumor suppressor	Btg1, Nras		Tcta
Other	Adprtl1, Blmh, Cdca7, Col3a1, Cstb, Dctn3, Gstp1, Gtpbp4, Hmgn2, Magoh, Pes1, Skd3, Slc19a1, Timp2, Topbp1, Tpm1	F3, Fth1, Npc2, Vars2	Lamb2, Man2b1, Mrps7, Mtap4, Nit1, Inhba
Protease	Serpine2	Herpud1
Protein degradation	Ctsb, Ggh, Psma5, Sqstm1, Thop1, Ubl3	Cul1, Psmb5, Psmd3	Usp4	Trip12, Ube2d3
Protein modification	Cpd, Pam, Sdf2	Gcs1, Ptpn1
Protein synthesis	Eif3s9, Npm1, Rpl32	Eef1d, Etf1, Pelo	Eef2, Eif4b, Mars, Mrpl23, Rpl21
Protein transport		Fxc1, Timm23	Scamp2
RNA processing	Ddx18, Hnrpd, Rbm8a, Snrpd3, Ssb	Bop1, Sfrs2, Snrpb2	Cstf3	Ddx17
Signal transduction	Akt1, Akt2, Dusp1, Frap1, Lancl1, Map3k1, Ptp4a1, Rab3a, Rock1, Thra, Tm4sf2	Dusp2, Fkbp4, Mfng, Psph	Apba3, Fkbp2, Fzd1, Pik3c3, Pip5k1a, Ptprf, Ptprn, Tsc2	F2r, Gdi1, Mdm2, Ppp2r4, Rgs16
Transcription	Erf, Esrra, Jun, Mnt, Mxi1, Psmb1, Rbbp4, Rnf4, Sp3, Tcf12, Tfdp1	Fosl1, Irf7, Polr2h, Zfp259, Zfp3611	Creb1, Irf3, Sfrs7, Zfp95
Transport	Sec61b	Slc1a4, Slc20a1	Slc2a2, Slc31a1, Srpr
Vesicular trafficking	Anxa4, Arf1, Pex14, Rab10	Syngr2	Anxa6, Vcp	Sec23b, Vamp2
* (Zeller et al., 2003)
**Function as annotated in database http://www.myccancergene.org/site/mycTargetDB.asp
1. Genes which are induced following early or sustained Myc activation, with no subsequent change in expression.
2. Genes which are induced during the first 24 hrs of Myc activation but return to baseline levels or less by 21 days.
3. Genes which are repressed following early or sustained Myc activation, with no subsequent change in expression.
4. Genes which are repressed during the first 24 hrs of Myc activation but return to baseline levels or higher at 21 days.

## Sheet: Table 4_Islet genes
Supplementary Table 4: 89 Signficantly Regulated Mature Islet-Specific Probe-sets (FC=fold change)
Probe Set ID	Gene Title	Gene Symbol	RefSeq Transcript ID	FC@ 2h	FC@ 4h	FC @ 8h	FC @ 24h	FC @ 21 d
100617_at	---	---	---	0.93354	0.997291	0.974834	1.01104	0.719249
100681_f_at	---	---	---	2.09953	1.28614	1.8194	4.7892	0.437825
98965_at	---	---	---	0.891994	0.829777	0.823697	0.824388	0.62685
99849_at	RIKEN cDNA 1200016E24 gene	1200016E24Rik	XM_489305	2.77969	1.3817	2.30119	1.85826	1.71064
160145_at	RIKEN cDNA 1810010M01 gene	1810010M01Rik	NM_026918	2.11581	1.40669	1.44669	4.76686	0.140074
96713_at	RIKEN cDNA 1810018P12 gene	1810018P12Rik	---	0.693121	0.330758	0.150653	0.404179	0.0999973
96122_at	RIKEN cDNA 2310016A09 gene	2310016A09Rik	NM_181588	0.906029	0.766486	0.853535	0.706822	1.37785
160119_at	RIKEN cDNA 5730592L21 gene	5730592L21Rik	NM_029720	0.665999	0.568864	1.32596	1.6434	0.207022
93484_at	RIKEN cDNA 9130427A09 gene	9130427A09Rik	NM_026240	0.797053	0.866134	0.695561	0.931119	0.662555
101058_at	amylase 1, salivary	Amy1	NM_007446	1.60906	1.52821	1.55543	2.2714	0.533396
97523_i_at	amylase 2, pancreatic	Amy2	NM_009669	1.708	1.69325	1.64335	1.81771	0.0920889
97524_f_at	amylase 2, pancreatic	Amy2	NM_009669	1.58013	1.40323	1.50362	1.71169	0.186675
98398_s_at	apolipoprotein B editing complex 1	Apobec1	NM_031159	1.20779	1.04223	1.12317	0.674252	0.660157
99570_s_at	ATPase, Ca++ transporting, cardiac muscle, slow twitch 2	Atp2a2	NM_009722	1.06826	0.829465	0.803307	0.776251	0.605142
100913_at	cDNA sequence BC026682	BC026682	NM_146149	0.709458	0.583587	0.385583	0.984885	0.328238
98133_at	calbindin-28K	Calb1	NM_009788	0.973465	1.03873	1.15705	1.26146	2.09345
94217_f_at	cell division cycle associated 3	Cdca3	NM_013538	0.770911	0.997982	1.03679	5.06206	1.65218
99667_at	cytochrome c oxidase, subunit VI a, polypeptide 2	Cox6a2	NM_009943	0.720029	0.601236	0.64263	0.60487	0.622756
160680_at	cytoplasmic polyadenylation element binding protein 1	Cpeb1	NM_007755	1.04866	1.19383	1.04889	0.822508	0.77052
104045_at	DNA segment, Chr 10, Brigham & Women's Genetics 0791 expressed	D10Bwg0791e	NM_030203 /// NM_133745	0.651267	0.664608	0.699365	0.604859	1.11391
160074_at	dopa decarboxylase	Ddc	NM_016672	0.810926	0.747608	0.619091	1.35561	1.69568
100882_at	defensin beta 1	Defb1	NM_007843	0.686551	0.482207	0.401015	0.717173	0.42804
94343_at	DnaJ (Hsp40) homolog, subfamily C, member 3	Dnajc3	NM_008929	0.966388	0.725531	1.18191	1.36803	0.596306
93783_at	elastase 1, pancreatic	Ela1	NM_033612	1.67673	1.34574	1.27885	2.43918	0.162626
94037_at	elastase 2	Ela2	NM_007919	1.7771	1.60712	1.50331	2.01885	0.295645
103891_i_at	elongation factor RNA polymerase II 2	Ell2	XM_484289	1.34763	0.9936	1.30929	1.41689	2.17141
160774_at	ectonucleoside triphosphate diphosphohydrolase 1	Entpd1	NM_009848	1.80171	0.842267	1.0863	0.857638	0.595149
103248_at	FK506 binding protein 1b	Fkbp1b	NM_016863	0.789301	0.659123	0.629638	0.787978	0.324197
95330_at	glucose-6-phosphatase, catalytic, 2	G6pc2	NM_021331	1.17754	0.898673	0.630001	0.699337	0.375545
103061_at	glutamic acid decarboxylase 1	Gad1	NM_008077	0.806083	0.203012	0.164232	0.49614	0.88543
96336_at	glycine amidinotransferase (L-arginine:glycine amidinotransferase)	Gatm	NM_025961	1.15899	1.18568	1.15106	1.28326	0.372362
102967_at	ganglioside-induced differentiation-associated-protein 1	Gdap1	NM_010267	0.909404	0.902216	0.810906	0.876268	1.83944
93575_at	gamma-glutamyl hydrolase	Ggh	NM_010281	1.74185	0.997505	1.3094	3.71498	1.1216
98807_at	guanine nucleotide binding protein, alpha transducing 2	Gnat2	NM_008141	0.829616	0.884236	0.745936	0.786352	0.62477
94206_at	gene rich cluster, C10 gene	Grcc10	NM_013535	1.04299	0.949627	1.04517	1.40995	1.66566
103993_at	gene rich cluster, C9 gene	Grcc9	NM_013539	0.757111	0.780271	0.692187	0.88266	0.782858
97541_f_at	histocompatibility 2, D region locus 1 /// histocompatibility 2, D region /// MHC (A.CA/J(H-2K-f) class I antigen	H2-D1 /// H2-L /// LOC56628	NM_010380 /// NM_019909	1.07545	0.91796	1.45727	0.774662	0.706624
98438_f_at	Histocompatibility 2, Q region locus 6	H2-Q7	NM_010394	1.22133	0.837816	1.02993	0.777868	0.651554
95057_at	homocysteine-inducible, endoplasmic reticulum stress-inducible, ubiquitin-like domain member 1	Herpud1	NM_022331	0.96777	0.736183	1.47767	1.38943	0.792665
97987_at	insulin-like growth factor binding protein, acid labile subunit	Igfals	NM_008340	0.7815	0.696165	0.498839	0.87253	0.602941
93914_at	interleukin 1 receptor, type I	Il1r1	NM_008362	0.939794	0.537398	0.50475	0.8428	0.470515
102266_at	inhibin alpha	Inha	NM_010564	0.799139	0.874246	1.01144	0.615411	0.611433
98467_at	inter alpha-trypsin inhibitor, heavy chain 4	Itih4	NM_018746	1.05328	1.05802	1.12116	2.01655	0.861048
100956_at	klotho	Kl	NM_013823	0.994168	0.928438	0.976359	0.958001	2.24896
95775_f_at	kallikrein 1	Klk1	NM_010645	2.15027	1.53155	1.93172	4.55089	0.523746
100719_f_at	kallikrein 16	Klk16	NM_008454	1.40746	1.57688	1.36074	3.31843	0.702598
102693_f_at	kallikrein 26	Klk26	NM_010644	1.26659	1.16189	1.07389	2.54916	0.895074
104495_f_at	kallikrein 5	Klk5	NM_008456	2.27842	1.38216	1.91674	6.77259	0.281739
104497_f_at	kallikrein 8	Klk8	NM_008457	1.26749	1.15925	0.959538	1.67947	0.751085
94716_f_at	kallikrein 9 /// kallikrein 6 /// kallikrein 1 /// nerve growth factor, alpha /// RIKEN cDNA 1700127D06 gene	Klk9 /// Klk6 /// Klk1 /// Ngfa /// 1700127D06Rik	NM_010116 /// NM_010639 /// NM_010645 /// NM_010915 /// NM_029831	2.00964	1.51248	1.7639	4.10748	0.434485
97507_at	lectin, galactoside-binding, soluble, 3 binding protein	Lgals3bp	NM_011150	1.10598	0.940702	0.776436	0.925466	0.659932
104658_at	leukemia inhibitory factor receptor	Lifr	NM_013584	0.983894	0.921347	0.836219	1.15169	0.633614
104659_g_at	leukemia inhibitory factor receptor	Lifr	NM_013584	1.10811	0.996356	0.920113	1.30332	0.770692
93078_at	lymphocyte antigen 6 complex, locus A	Ly6a	NM_010738	1.27387	1.40119	1.52301	0.880981	0.766959
93885_g_at	endomucin	MGI:1891716	NM_016885	1.18224	1.01997	0.553469	0.773743	0.439183
94997_at	endomucin	MGI:1891716	NM_016885	0.960062	1.02288	0.798192	0.705601	0.447497
102953_at	mesothelin	Msln	NM_018857	1.00243	0.987207	0.932347	1.39184	0.635856
160819_at	N-myc downstream regulated gene 4	Ndrg4	NM_145602	0.925254	0.618695	1.28553	0.849259	2.43107
104381_at	nuclear receptor subfamily 1, group H, member 3	Nr1h3	NM_013839	0.819718	0.725254	0.953196	0.801253	0.477846
102197_at	nucleobindin 2	Nucb2	NM_016773	0.977289	0.715685	0.769305	1.22963	0.474842
160108_at	nuclear protein 1	Nupr1	NM_019738	1.52702	0.980943	1.40879	1.94934	0.140218
99662_at	pericentrin 1	Pcnt1	NM_001002929	2.24531	2.03678	2.78894	1.53714	1.56224
99663_g_at	pericentrin 1	Pcnt1	NM_001002929	1.87691	2.03356	2.574	1.39953	1.58544
102296_at	proprotein convertase subtilisin/kexin type 2	Pcsk2	NM_008792	0.903441	0.724552	0.721788	0.833743	0.943895
99926_at	polymeric immunoglobulin receptor	Pigr	NM_011082	0.952209	0.643198	0.544695	1.0877	0.560857
103573_at	phosphatidylinositol-4-phosphate 5-kinase, type 1 alpha	Pip5k1a	NM_008846	1.07861	0.894751	0.680566	0.913357	0.623073
160070_at	pancreatic lipase-related protein 2	Pnliprp2	NM_011128	1.26643	0.994613	1.26788	3.23395	0.504005
96198_at	protein kinase C, zeta	Prkcz	NM_008860	0.860894	0.807741	0.926477	1.06486	0.633116
93651_r_at	proline rich protein 2	Prp2	NM_031499	0.900713	0.996256	0.804306	0.844208	0.621121
92873_f_at	protease, serine, 2	Prss2	NM_009430	1.90616	1.90603	1.74085	2.38006	0.244376
104422_at	protein tyrosine phosphatase, receptor type, N	Ptprn	NM_008985	0.662502	0.608392	0.517374	0.644183	0.906854
97325_at	PX domain containing serine/threonine kinase	Pxk	NM_145458	0.873689	0.791526	0.778238	0.70942	0.314442
99587_at	RAB7, member RAS oncogene family	Rab7	NM_009005	1.03782	0.91465	1.09701	0.88807	0.607901
102650_at	regulator of G-protein signaling 11	Rgs11	XM_128488	1.02578	1.09422	1.05924	0.577388	0.578247
97844_at	regulator of G-protein signaling 2	Rgs2	NM_009061	3.3538	1.37139	1.31317	1.22095	2.88885
101421_at	ring finger protein 5	Rnf5	NM_019403	0.881797	0.897482	0.908192	1.40352	0.914019
101389_at	scavenger receptor class B, member 2	Scarb2	NM_007644	0.957746	0.769756	0.955889	1.08715	0.980289
103357_at	solute carrier family 2 (facilitated glucose transporter), member 2	Slc2a2	NM_031197	1.31157	0.816353	0.422621	0.657652	0.312573
104214_at	solute carrier family 7 (cationic amino acid transporter, y+ system), member 8	Slc7a8	NM_016972	0.953978	0.83252	0.788583	0.960823	0.619735
161026_s_at	synaptotagmin-like 4	Sytl4	NM_013757	0.919856	0.735421	0.523991	0.61608	0.59866
96978_at	synaptotagmin-like 4	Sytl4	NM_013757	0.927297	0.782092	0.597631	0.634378	0.639842
93302_at	trefoil factor 2 (spasmolytic protein 1)	Tff2	NM_009363	1.74048	1.26171	1.64554	4.16707	0.284023
96708_at	transmembrane emp24 domain containing 3	Tmed3	NM_025360	0.88728	0.782806	0.778853	1.01419	0.522742
99532_at	transducer of ErbB-2.1	Tob1	NM_009427	0.883493	0.939069	0.735885	1.70706	2.02517
101043_f_at	trypsin 4 /// similar to trypsinogen 9 /// RIKEN cDNA 1810049H19 gene	Try4 /// LOC435889 /// 1810049H19Rik	NM_001003405 /// NM_011646 /// XM_487918	2.37462	1.90749	1.9707	3.63412	0.106665
101338_f_at	trypsin 4 /// Try10-like trypsinogen	Try4 /// Try10l	--- /// NM_001003664 /// NM_011646	2.17787	1.82867	1.85909	3.74178	0.181235
94207_at	Thioredoxin domain containing 7	Txndc7	NM_027959	0.935874	0.889904	1.05398	1.11441	0.479256
94208_at	thioredoxin domain containing 7	Txndc7	NM_027959	0.968294	0.984457	0.920187	1.27557	0.82431
94209_g_at	thioredoxin domain containing 7	Txndc7	NM_027959	0.956304	0.781391	0.840695	1.51316	0.543947

## Sheet: Table 5_Regression
Supplementary Table 5: 1,431 Probe-sets significant in regression cohort
Probe Set ID	Gene Title	Gene Symbol	RefSeq Transcript ID
100839_at	---	---	---
100910_at	---	---	---
101204_at	---	---	---
101217_at	---	---	---
101218_at	---	---	---
101220_at	---	---	---
101225_at	---	---	---
101364_at	---	---	---
101399_at	---	---	---
101526_at	---	---	---
101541_at	---	---	---
101642_at	---	---	---
101646_at	---	---	---
101668_at	---	---	---
101674_at	---	---	---
101781_f_at	---	---	---
101783_i_at	---	---	---
101982_at	---	---	---
102080_at	---	---	---
102094_f_at	---	---	---
102130_f_at	---	---	---
102137_f_at	---	---	---
102158_at	---	---	---
102170_at	---	---	---
102477_at	---	---	---
102652_at	---	---	---
102767_at	---	---	---
102777_at	---	---	---
102946_r_at	---	---	---
103344_at	---	---	---
103731_at	---	---	---
104175_at	---	---	---
104225_at	---	---	---
104612_g_at	---	---	---
104665_g_at	---	---	---
160080_r_at	---	---	---
160157_at	---	---	---
160241_at	---	---	---
160476_f_at	---	---	---
160599_r_at	---	---	---
160601_at	---	---	---
160642_at	---	---	---
160685_at	---	---	---
160691_at	---	---	---
160837_at	---	---	---
161022_at	---	---	---
161133_at	---	---	---
161154_at	---	---	---
161162_at	---	---	---
161198_r_at	---	---	---
161227_r_at	---	---	---
161228_f_at	---	---	---
161233_at	---	---	---
161240_f_at	---	---	---
161246_at	---	---	---
161272_f_at	---	---	---
161406_at	Transcribed locus, weakly similar to NP_076356.1 RIKEN cDNA 8030498B09 gene [Mus musculus]	---	---
161498_at	---	---	---
161519_f_at	---	---	---
161547_f_at	---	---	---
161626_f_at	---	---	---
161633_r_at	---	---	---
161677_r_at	---	---	---
161680_r_at	---	---	---
161750_f_at	---	---	---
161844_at	---	---	---
161872_f_at	---	---	---
161877_f_at	---	---	---
161934_f_at	---	---	---
161948_f_at	---	---	---
161961_at	---	---	---
162013_f_at	---	---	---
162017_at	---	---	---
162020_at	---	---	---
162058_f_at	---	---	---
162096_at	---	---	---
162131_f_at	---	---	---
162159_i_at	---	---	---
162165_f_at	---	---	---
162189_r_at	---	---	---
162225_f_at	---	---	---
162311_f_at	---	---	---
162339_r_at	---	---	---
162353_at	---	---	---
162363_at	Transcribed locus	---	---
162433_f_at	---	---	---
162441_i_at	---	---	---
92241_at	---	---	---
92260_at	MRNA containing B1 element, clone vario	---	---
92336_at	---	---	---
92337_g_at	---	---	---
92370_at	---	---	---
92385_at	---	---	---
92451_at	---	---	---
92518_at	---	---	---
92684_at	---	---	---
92864_at	---	---	---
92980_at	---	---	---
93304_at	---	---	---
93524_i_at	---	---	---
93572_at	---	---	---
93650_i_at	Proline-rich salivary protein	---	---
93707_f_at	---	---	---
93818_g_at	---	---	---
94106_at	Transcribed locus	---	---
94786_at	---	---	---
94961_at	---	---	---
95164_at	---	---	---
95482_at	---	---	---
95514_at	---	---	---
95634_at	---	---	---
95697_at	---	---	---
95807_at	---	---	---
95943_at	---	---	---
95959_at	---	---	---
95972_at	---	---	---
95986_at	---	---	---
95990_at	---	---	---
95997_at	13 days embryo heart cDNA, RIKEN full-length enriched library, clone:D330049O10 product:unclassifiable, full insert sequence	---	---
96308_r_at	Similar to 60S ribosomal protein L34	---	XM_485407
96391_at	Transcribed locus, moderately similar to XP_328828.1 Neurospora crassa NCU08122.1 gene	---	---
96424_at	Transcribed locus	---	---
96485_at	---	---	---
96489_at	---	---	---
96931_at	---	---	---
96970_at	---	---	---
97120_at	---	---	---
97148_at	---	---	---
97693_at	---	---	---
98117_at	---	---	---
98358_at	---	---	---
98530_at	---	---	---
98570_at	---	---	---
98826_at	---	---	---
98892_at	---	---	---
98971_at	---	---	---
99472_at	---	---	---
99654_s_at	---	---	---
99819_at	---	---	---
99963_at	---	---	---
95677_at	RIKEN cDNA 0610009C03 gene	0610009C03Rik	NM_025645
99166_at	RIKEN cDNA 0610012G03 gene	0610012G03Rik	NM_025320
94907_f_at	RIKEN cDNA 1110001J03 gene	1110001J03Rik	NM_025363
98061_at	RIKEN cDNA 1110001K21 gene	1110001K21Rik	NM_025839
160240_at	RIKEN cDNA 1110003E01 gene	1110003E01Rik	NM_133697
92565_at	RIKEN cDNA 1110005A23 gene	1110005A23Rik	NM_025364
160333_at	RIKEN cDNA 1110008F13 gene	1110008F13Rik	NM_026124
96709_at	RIKEN cDNA 1110008P14 gene	1110008P14Rik	NM_198001
93336_at	RIKEN cDNA 1110014C03 gene	1110014C03Rik	NM_026775
97843_at	RIKEN cDNA 1110034E15 gene	1110034E15Rik	---
95596_at	RIKEN cDNA 1110054H05 gene	1110054H05Rik	XM_126489
92941_at	RIKEN cDNA 1110054M08 gene	1110054M08Rik	---
93054_at	RIKEN cDNA 1110054N06 gene	1110054N06Rik	NM_175134
160387_at	RIKEN cDNA 1110055L24 gene	1110055L24Rik	NM_025422
162360_f_at	RIKEN cDNA 1110061O04 gene	1110061O04Rik	NM_026849
160664_at	RIKEN cDNA 1200004M23 gene	1200004M23Rik	NM_026169
98462_s_at	RIKEN cDNA 1200014P03 gene	1200014P03Rik	NM_029091
95078_at	RIKEN cDNA 1200015F23 gene	1200015F23Rik	XM_203936
93975_at	RIKEN cDNA 1300002F13 gene	1300002F13Rik	NM_133753
161729_f_at	RIKEN cDNA 1300006C06 gene	1300006C06Rik	NM_028792
103531_f_at	RIKEN cDNA 1300013B24 gene	1300013B24Rik	NM_026184
160787_at	RIKEN cDNA 1500010J02 gene	1500010J02Rik	XM_488515
102072_g_at	RIKEN cDNA 1500034J01 gene	1500034J01Rik	XM_356085
102312_r_at	RIKEN cDNA 1500034J01 gene	1500034J01Rik	XM_356085
161719_f_at	RIKEN cDNA 1500034J01 gene	1500034J01Rik	XM_356085
97404_at	RIKEN cDNA 1500034J01 gene	1500034J01Rik	XM_356085
97413_at	RIKEN cDNA 1600029D21 gene	1600029D21Rik	NM_029639
104726_at	RIKEN cDNA 1700013L23 gene	1700013L23Rik	NM_027062
95551_at	RIKEN cDNA 1700020M16 gene	1700020M16Rik	XM_127811
97685_at	RIKEN cDNA 1700023D09 gene	1700023D09Rik	---
104593_at	RIKEN cDNA 1700023O11 gene	1700023O11Rik	NM_029339
96811_at	RIKEN cDNA 1700093E07 gene	1700093E07Rik	NM_133685
160486_at	RIKEN cDNA 1810010N17 gene	1810010N17Rik	NM_025455
97265_at	RIKEN cDNA 1810013D10 gene	1810013D10Rik	XM_485608
95137_at	RIKEN cDNA 1810014L12 gene	1810014L12Rik	NM_133706
97277_at	RIKEN cDNA 1810015M01 gene	1810015M01Rik	NM_026933
160556_at	RIKEN cDNA 1810020G14 gene	1810020G14Rik	NM_025461
97775_at	Expressed sequence AA511254	1810021J13Rik	NM_025464
101386_at	RIKEN cDNA 1810030J14 gene	1810030J14Rik	NM_025470
161169_f_at	RIKEN cDNA 1810030O07 gene	1810030O07Rik	NM_175141
162356_r_at	RIKEN cDNA 1810042K04 gene	1810042K04Rik	NM_025604
160983_at	RIKEN cDNA 1810044D09 gene	1810044D09Rik	---
94453_at	RIKEN cDNA 1810046J19 gene	1810046J19Rik	NM_025559
94925_at	RIKEN cDNA 1810055D05 gene	1810055D05Rik	NM_026332
97422_at	RIKEN cDNA 2010002H18 gene	2010002H18Rik	NM_198653
161562_f_at	RIKEN cDNA 2210018M03 gene	2210018M03Rik	XM_355849
160434_at	RIKEN cDNA 2310004K06 gene	2310004K06Rik	NM_020050
160872_f_at	RIKEN cDNA 2310008H09 gene	2310008H09Rik	NM_023197
102783_at	RIKEN cDNA 2310009E04 gene /// similar to hypothetical protein FLJ10986	2310009E04Rik /// LOC435793	NM_029347 /// XM_487808
98942_r_at	RIKEN cDNA 2310032D16 gene	2310032D16Rik	NM_027096 /// NM_028802
96871_at	RIKEN cDNA 2310042G06 gene	2310042G06Rik	NM_025531
101404_at	RIKEN cDNA 2310061I09 gene	2310061I09Rik	NM_027159
96271_at	RIKEN cDNA 2310075C12 gene	2310075C12Rik	NM_133739
95501_at	RIKEN cDNA 2410001C21 gene	2410001C21Rik	NM_025542
104513_at	RIKEN cDNA 2410004N09 gene	2410004N09Rik	---
162003_at	RIKEN cDNA 2410005K20 gene	2410005K20Rik	NM_025546
94053_at	RIKEN cDNA 2410006F12 gene	2410006F12Rik	NM_028020
97256_at	RIKEN cDNA 2410011G03 gene	2410011G03Rik	NM_025551
100912_at	RIKEN cDNA 2410012M04 gene	2410012M04Rik	NM_027193
96294_s_at	RIKEN cDNA 2410015N17 gene	2410015N17Rik	NM_023203
98920_g_at	RIKEN cDNA 2410018G23 gene	2410018G23Rik	NM_027194
102120_f_at	RIKEN cDNA 2410018L13 gene	2410018L13Rik	NM_028362
96780_at	RIKEN cDNA 2410022L05 gene	2410022L05Rik	NM_025556
96552_at	RIKEN cDNA 2410118I19 gene	2410118I19Rik	XM_129726
97865_g_at	RIKEN cDNA 2510049I19 gene	2510049I19Rik	NM_026455
102057_r_at	RIKEN cDNA 2610002J02 gene	2610002J02Rik	XM_131827
94520_at	RIKEN cDNA 2610003J06 gene	2610003J06Rik	NM_028101
101053_at	RIKEN cDNA 2610031L17 gene	2610031L17Rik	NM_133701
102368_at	RIKEN cDNA 2610208E05 gene	2610208E05Rik	NM_175364
93428_at	RIKEN cDNA 2610300B10 gene	2610300B10Rik	XM_283661
92282_at	RIKEN cDNA 2610304G08 gene	2610304G08Rik	NM_027434
94273_at	RIKEN cDNA 2610311I19 gene	2610311I19Rik	NM_023311
98538_at	RIKEN cDNA 2610507B11 gene	2610507B11Rik	NM_001002004
100955_at	RIKEN cDNA 2700084L22 gene	2700084L22Rik	NM_026024
96493_at	RIKEN cDNA 2810002I04 gene	2810002I04Rik	NM_172414
99006_at	RIKEN cDNA 2810040C05 gene	2810040C05Rik	---
160278_at	RIKEN cDNA 2810428I15 gene	2810428I15Rik	NM_025577
101741_at	RIKEN cDNA 2810433D01 gene	2810433D01Rik	XM_484087
99185_at	RIKEN cDNA 2810443J12 gene	2810443J12Rik	NM_026044
102099_f_at	RIKEN cDNA 2900008M13 gene	2900008M13Rik	XM_110121
96658_at	RIKEN cDNA 2900010J23 gene	2900010J23Rik	NM_175190
98476_at	RIKEN cDNA 2900054D09 gene	2900054D09Rik	---
97462_at	RIKEN cDNA 3110006P09 gene	3110006P09Rik	NM_026521
161928_at	RIKEN cDNA 3110079O15 gene	3110079O15Rik	XM_129926
161108_r_at	RIKEN cDNA 4732472I07 gene	4732472I07Rik	XM_195168
96647_at	RIKEN cDNA 4833420K19 gene	4833420K19Rik	NM_029775
95445_at	RIKEN cDNA 4833439L19 gene	4833439L19Rik	NM_133797
99163_at	RIKEN cDNA 4921506J03 gene	4921506J03Rik	XM_356498
103563_at	RIKEN cDNA 4930555L03 gene	4930555L03Rik	---
95123_at	RIKEN cDNA 4930566A11 gene	4930566A11Rik	---
96090_g_at	RIKEN cDNA 4931406C07 gene	4931406C07Rik	NM_133732
104284_at	RIKEN cDNA 5031439G07 gene	5031439G07Rik	XM_128281
96613_at	RIKEN cDNA 5730536A07 gene	5730536A07Rik	NM_026635
160119_at	RIKEN cDNA 5730592L21 gene	5730592L21Rik	NM_029720
100290_f_at	RIKEN cDNA 6230416J20 gene	6230416J20Rik	NM_173400
161737_at	RIKEN cDNA 6230425C22 gene	6230425C22Rik	XM_109904
161613_at	RIKEN cDNA 6330407G04 gene	6330407G04Rik	NM_134078
103424_at	RIKEN cDNA 6330442E10 gene	6330442E10Rik	NM_178745
103198_at	RIKEN cDNA 6330512M04 gene	6330512M04Rik	NM_177265
101607_at	RIKEN cDNA 6720425G15 gene	6720425G15Rik	XM_203601
95914_at	RIKEN cDNA 6720461J16 gene	6720461J16Rik	NM_175551
101929_at	RIKEN cDNA 6720463E02 gene	6720463E02Rik	NM_026556
104091_at	RIKEN cDNA 9430079M16 gene	9430079M16Rik	NM_175414
98346_at	RIKEN cDNA 9530051K01 gene	9530051K01Rik	XM_485965
160963_at	RIKEN cDNA 9630050M13 gene	9630050M13Rik	XM_194000
102977_at	nonagouti	a	NM_015770
94995_at	RIKEN cDNA A030007L17 gene	A030007L17Rik	NM_026637
160598_at	RIKEN cDNA A230106M15 gene	A230106M15Rik	NM_175474
97826_at	RIKEN cDNA A430096B05 gene	A430096B05Rik	XM_488307
104475_at	Hypothetical protein 6030458H05	AA408278	---
97687_at	Expressed sequence AA408865	AA408865	---
103751_at	expressed sequence AA409316	AA409316	NM_134087
98878_r_at	achalasia, adrenocortical insufficiency, alacrimia	Aaas	NM_153416
98064_at	angio-associated migratory protein	Aamp	NM_146110
92511_at	arylalkylamine N-acetyltransferase	Aanat	NM_009591
103389_at	aminoadipate-semialdehyde synthase	Aass	NM_013930
103273_s_at	ATP-binding cassette, sub-family C (CFTR/MRP), member 8	Abcc8	---
103401_at	acyl-Coenzyme A dehydrogenase, short chain	Acads	NM_007383
161469_r_at	acyl-Coenzyme A dehydrogenase, short chain	Acads	NM_007383
99910_at	amiloride-sensitive cation channel 1, neuronal (degenerin)	Accn1	NM_007384
103219_at	acid phosphatase, prostate	Acpp	NM_019807 /// NM_207668
93207_at	preproacrosin	Acr	NM_013455
99456_at	proacrosin binding protein	Acrbp	NM_016845
95659_at	actin-like 6A	Actl6a	NM_019673
93903_at	activin receptor IIB	Acvr2b	NM_007397
93205_at	adenosine deaminase	Ada	NM_007398
93206_g_at	adenosine deaminase	Ada	NM_007398
162388_r_at	A disintegrin and metalloprotease domain 5	Adam5	NM_007401
101626_at	a disintegrin and metalloprotease domain 7	Adam7	NM_007402
103241_at	adenylate cyclase 2	Adcy2	NM_153534
92527_at	adenylate cyclase 9	Adcy9	NM_009624
104271_at	adrenomedullin receptor	Admr	NM_007412
99039_g_at	adenylosuccinate synthetase, non muscle	Adss	NM_007422
93720_at	1-acylglycerol-3-phosphate O-acyltransferase 1 (lysophosphatidic acid acyltransferase, alpha)	Agpat1	NM_018862
97921_at	agrin	Agrn	NM_021604
96024_at	S-adenosylhomocysteine hydrolase	Ahcy	NM_016661
93799_at	expressed sequence AI316787	AI316787	NM_199199
160883_at	Expressed sequence AI325464	AI325464	NM_178882
161008_at	expressed sequence AI428936	AI428936	NM_153577
161857_r_at	expressed sequence AI428936	AI428936	NM_153577
101235_f_at	Expressed sequence AI450241	AI450241	---
97610_f_at	Expressed sequence AI450241	AI450241	---
160672_at	expressed sequence AI462438	AI462438	NM_133840
104034_at	expressed sequence AI464131	AI464131	XM_283952
95528_at	expressed sequence AI507495	AI507495	NM_213728
96801_at	adenylate kinase 1	Ak1	NM_021515
92796_at	alkaline phosphatase 2, liver	Akp2	NM_007431
162331_f_at	aldehyde dehydrogenase family 3, subfamily A1	Aldh3a1	NM_007436
99548_at	aldehyde dehydrogenase family 3, subfamily A1	Aldh3a1	NM_007436
93781_at	aldehyde reductase (aldose reductase)-like 6	Aldrl6	NM_019977
96423_at	aristaless 3	Alx3	NM_007441
98094_f_at	autocrine motility factor receptor	Amfr	NM_011787
102114_f_at	angiopoietin-like 4	Angptl4	NM_020581
100569_at	annexin A2	Anxa2	NM_007585
93083_at	annexin A5	Anxa5	NM_009673
161439_f_at	adaptor-related protein complex AP-1, mu subunit 1	Ap1m1	NM_007456
97526_at	adaptor-related protein complex 3, mu 1 subunit	Ap3m1	NM_018829
94388_at	adaptor-related protein complex 3, sigma 2 subunit	Ap3s2	NM_009682
92727_at	amyloid beta (A4) precursor protein-binding, family A, member 2	Apba2	NM_007461
101621_at	androgen-binding protein eta	Apbh	NM_020563
102582_at	adenomatosis polyposis coli 2	Apc2	NM_011789
93559_at	apurinic/apyrimidinic endonuclease 1	Apex1	NM_009687
102943_at	autophagy 7-like (S. cerevisiae)	Apg7l	NM_028835
93498_s_at	amyloid beta (A4) precursor-like protein 2	Aplp2	NM_009691
99359_at	Hypothetical LOC403343	Apoa4	NM_007468
97236_r_at	apolipoprotein B editing complex 2	Apobec2	NM_009694
94318_at	apolipoprotein H	Apoh	NM_013475
93840_at	apolipoprotein M	Apom	NM_018816
161330_r_at	adenine phosphoribosyl transferase	Aprt	NM_009698
103612_at	aquaporin 2	Aqp2	NM_009699
102200_at	aquaporin 8	Aqp8	NM_007474
100518_at	ADP-ribosylation factor 2	Arf2	NM_007477
100883_at	ADP-ribosylation factor 4-like	Arfl4	NM_025404
101866_at	ADP-ribosylation factor related protein 1	Arfrp1	NM_029702
93631_at	rho/rac guanine nucleotide exchange factor (GEF) 2	Arhgef2	NM_008487
92805_s_at	ADP-ribosylation factor-like 4	Arl4	NM_007487
92294_at	ADP-ribosylation factor-like 5	Arl5	NM_182994
95749_at	arginine-rich, mutated in early stage tumors	Armet	NM_029103
92910_at	aryl hydrocarbon receptor nuclear translocator 2	Arnt2	NM_007488
95144_at	actin related protein 2/3 complex, subunit 1A	Arpc1a	NM_019767
161645_r_at	activating transcription factor 3	Atf3	NM_007498
102569_at	atonal homolog 1 (Drosophila)	Atoh1	NM_007500
101811_at	atonal homolog 7 (Drosophila)	Atoh7	NM_016864
160500_at	ATPase, Na+/K+ transporting, beta 1 polypeptide	Atp1b1	NM_009721
99570_s_at	ATPase, Ca++ transporting, cardiac muscle, slow twitch 2	Atp2a2	NM_009722
93404_g_at	ATPase, Ca++ transporting, ubiquitous	Atp2a3	NM_016745
92798_at	ATP synthase, H+ transporting, mitochondrial F1 complex, gamma polypeptide 1	Atp5c1	NM_020615
161047_at	ATP synthase, H+ transporting, mitochondrial F1 complex, delta subunit	Atp5d	NM_025313
161494_f_at	ATP synthase, H+ transporting, mitochondrial F1 complex, delta subunit	Atp5d	NM_025313
162343_f_at	ATP synthase, H+ transporting, mitochondrial F1 complex, delta subunit	Atp5d	NM_025313
94279_at	ATP synthase, H+ transporting, mitochondrial F1 complex, delta subunit	Atp5d	NM_025313
96898_at	ATP synthase, H+ transporting, mitochondrial F0 complex, subunit b, isoform 1	Atp5f1	NM_009725
96919_at	ATPase, H+ transporting, V0 subunit C	Atp6v0c	NM_009729
92603_at	ATPase, H+ transporting, V0 subunit D isoform 1	Atp6v0d1	NM_013477
95746_at	ATPase, H+ transporting, V1 subunit A, isoform 1	Atp6v1a1	NM_007508
160609_at	ATPase, Cu++ transporting, alpha polypeptide	Atp7a	NM_009726
100335_at	ATPase, Cu++ transporting, beta polypeptide	Atp7b	NM_007511
97176_at	ATPase, class I, type 8B, member 1	Atp8b1	NM_001001488
104727_at	Expressed sequence AW495713	AW495713	---
99239_at	axin2	Axin2	NM_015732
96340_at	RIKEN cDNA B230114J08 gene	B230114J08Rik	NM_030018
93088_at	beta-2 microglobulin	B2m	NM_009735
104273_at	bile acid-Coenzyme A: amino acid N-acyltransferase	Baat	NM_007519
92528_at	brain-specific angiogenesis inhibitor 1	Bai1	NM_174991
103098_at	brain-specific angiogenesis inhibitor 1-associated protein 2	Baiap2	NM_130862
100714_at	bagpipe homeobox gene 1 homolog (Drosophila)	Bapx1	NM_007524
93921_at	HLA-B-associated transcript 3	Bat3	NM_057171
97873_at	CDNA sequence BC004012	BC004012	NM_138671
160625_f_at	cDNA sequence BC004636	BC004636	NM_145524
93004_r_at	cDNA sequence BC018242	BC018242	NM_144935
95564_at	cDNA sequence BC018601	BC018601	NM_134033
103988_at	cDNA sequence BC023754	BC023754	XM_148895
96001_at	cDNA sequence BC024322	BC024322	NM_173748
103879_at	cDNA sequence BC024806	BC024806	NM_172291
101470_at	cDNA sequence BC028975	BC028975	NM_146254
103485_at	cDNA sequence BC030046	BC030046	XM_147850
160366_at	cDNA sequence BC031181	BC031181	NM_001001181
104643_at	cDNA sequence BC037006	BC037006	XM_109956
96518_at	cDNA sequence BC037006	BC037006	XM_109956
92670_at	cDNA sequence BC037527	BC037527	NM_172259
97101_at	cDNA sequence BC037527	BC037527	NM_172259
161895_s_at	cDNA sequence BC054822	BC054822	XM_354626
95909_at	CDNA sequence BC057079	BC057079	XM_283973
92700_at	brevican	Bcan	NM_007529
93252_at	B-cell receptor-associated protein 31	Bcap31	NM_012060
98870_at	B-cell leukemia/lymphoma 2	Bcl2	NM_009741 /// NM_177410
96044_at	Bcl2-like 10	Bcl2l10	NM_013479
99418_at	BCL2-like 11 (apoptosis facilitator)	Bcl2l11	NM_009754 /// NM_207680 /// NM_207681
97284_at	BCL2-like 13 (apoptosis facilitator)	Bcl2l13	NM_153516
101189_at	BH3 interacting (with BCL2 family) domain, apoptosis agonist	Bid3	NM_007545
162221_i_at	bleomycin hydrolase	Blmh	NM_178645
95557_at	bone morphogenetic protein 1	Bmp1	NM_009755
99865_at	bone morphogenic protein receptor, type II (serine/threonine kinase)	Bmpr2	NM_007561
161599_i_at	block of proliferation 1	Bop1	NM_013481
103232_at	BPY2 interacting protein 1	Bpy2ip1	NM_173013
93057_at	basic transcription factor 3	Btf3	NM_145455
97095_at	Budding uninhibited by benzimidazoles 1 homolog (S. cerevisiae)	Bub1	NM_009772
101961_at	budding uninhibited by benzimidazoles 3 homolog (S. cerevisiae)	Bub3	NM_009774
95042_at	RIKEN cDNA C030002N13 gene	C030002N13Rik	NM_145550
101599_at	RIKEN cDNA C030018P15 gene	C030018P15Rik	---
94662_at	RIKEN cDNA C030048B08 gene	C030048B08Rik	NM_172991
160386_at	RIKEN cDNA C130052I12 gene	C130052I12Rik	NM_146047
98562_at	complement component 1, q subcomponent, alpha polypeptide	C1qa	NM_007572
161549_f_at	C1q and tumor necrosis factor related protein 1	C1qtnf1	NM_019959
160973_at	RIKEN cDNA C330027C09 gene	C330027C09Rik	NM_172616
103308_at	expressed sequence C79407	C79407	NM_172578
95994_at	Expressed sequence C80012	C80012	---
96481_at	expressed sequence C80638	C80638	NM_178877
95982_at	RIKEN cDNA C920021L13 gene	C920021L13Rik	---
92445_at	calcium channel, voltage-dependent, P/Q type, alpha 1A subunit	Cacna1a	NM_007578
98300_at	calcium channel, voltage dependent, alpha2/delta subunit 3	Cacna2d3	NM_009785
94182_at	calcium channel, voltage-dependent, gamma subunit 2	Cacng2	NM_007583
92596_at	calcyclin binding protein	Cacybp	NM_009786
93293_at	calmodulin 2	Calm2	NM_007589
93660_at	calcium/calmodulin-dependent protein kinase II alpha	Camk2a	NM_009792 /// NM_177407
104455_at	calcium/calmodulin-dependent protein kinase IV	Camk4	NM_009793
162415_f_at	Calcium activated nucleotidase 1	Cant1	NM_029502
99833_at	calpain 9 (nCL-4)	Capn9	NM_023709
93499_at	capping protein (actin filament) muscle Z-line, alpha 1	Capza1	NM_009797
103046_at	carbonic anhydrase 4	Car4	NM_007607
98137_at	carbonic anhydrase 5a, mitochondrial	Car5a	NM_007608
103837_at	caspase 14	Casp14	NM_009809
161263_f_at	caspase 2	Casp2	NM_007610
160430_at	catenin beta	Catnb	NM_007614
102833_at	chromobox homolog 2 (Drosophila Pc class)	Cbx2	NM_007623
97723_at	chromobox homolog 2 (Drosophila Pc class)	Cbx2	NM_007623
96055_at	cholecystokinin	Cck	NM_031161
101344_at	cholecystokinin B receptor	Cckbr	NM_007627
94166_g_at	chemokine (C-C motif) ligand 1	Ccl1	NM_011329
98478_at	cyclin G2	Ccng2	NM_007635
94696_at	chemokine (C-C motif) receptor 4	Ccr4	NM_009916
99535_at	CCR4 carbon catabolite repression 4-like (S. cerevisiae)	Ccrn4l	NM_009834
93907_f_at	CCR4 carbon catabolite repression 4-like (S. cerevisiae) /// intracisternal A particles /// hypothetical protein LOC280487 /// similar to RIKEN cDNA 2610524H06 gene	Ccrn4l /// Iap /// LOC280487 /// LOC434662	NM_009834 /// NM_010490 /// NM_183299 /// XM_486526
162351_f_at	copper chaperone for superoxide dismutase	Ccs	NM_016892
162382_f_at	copper chaperone for superoxide dismutase	Ccs	NM_016892
98153_at	chaperonin subunit 3 (gamma)	Cct3	NM_009836
98446_s_at	chaperonin subunit 3 (gamma)	Cct3	NM_009836
101011_at	chaperonin subunit 4 (delta)	Cct4	NM_009837
103480_at	CD4 antigen	Cd4	NM_013488
95020_at	CD47 antigen (Rh-related antigen, integrin-associated signal transducer)	Cd47	NM_010581
102935_at	cell division cycle 25 homolog C (S. cerevisiae)	Cdc25c	NM_009860
161457_at	cell division cycle 2-like 1	Cdc2l1	NM_007661
94105_at	cell division cycle 42 homolog (S. cerevisiae)	Cdc42	NM_009861
95371_g_at	cadherin 4	Cdh4	NM_009867
96155_at	CDK5 regulatory subunit associated protein 3	Cdk5rap3	NM_030248
98789_at	cyclin-dependent kinase inhibitor 2A	Cdkn2a	NM_009877
161773_i_at	CDP-diacylglycerol synthase (phosphatidate cytidylyltransferase) 2	Cds2	NM_138651
160326_at	carnitine deficiency-associated gene expressed in ventricle 3	Cdv3	NM_175565 /// NM_175833
160441_at	CEA-related cell adhesion molecule 11	Ceacam11	NM_023289
98770_at	centromere autoantigen C1	Cenpc1	NM_007683
101145_at	Centrosomal protein 2	Cep2	XM_358344
101426_at	ceramide kinase	Cerk	NM_145475
103945_at	cripto, FRL-1, cryptic family 1	Cfc1	NM_007685
92425_at	chromodomain helicase DNA binding protein 1-like	Chd1l	NM_026539
160825_at	checkpoint with forkhead and ring finger domains	Chfr	NM_172717
92422_at	chromogranin A	Chga	NM_007693
93994_at	choline phosphotransferase 1	Chpt1	NM_144807
101131_at	cholinergic receptor, nicotinic, alpha polypeptide 7	Chrna7	NM_007390
93705_at	cholinergic receptor, nicotinic, beta polypeptide 1 (muscle)	Chrnb1	NM_009601
92966_g_at	cholinergic receptor, nicotinic, epsilon polypeptide	Chrne	NM_009603
99994_at	cell death-inducing DNA fragmentation factor, alpha subunit-like effector A	Cidea	NM_007702
102329_at	cell death-inducing DNA fragmentation factor, alpha subunit-like effector B	Cideb	NM_009894
95374_f_at	cartilage intermediate layer protein 2	Cilp2	XM_146393
95375_r_at	cartilage intermediate layer protein 2	Cilp2	XM_146393
162383_r_at	Cytokine inducible SH2-containing protein	Cish	NM_009895
160705_at	Cbp/p300-interacting transactivator with Glu/Asp-rich carboxy-terminal domain 1	Cited1	NM_007709
97276_at	cytoskeleton-associated protein 1	Ckap1	NM_025548
160312_at	chemokine-like factor super family 6	Cklfsf6	NM_026036
161569_f_at	creatine kinase, muscle	Ckm	NM_007710
95376_at	Chloride channel 1	Clcn1	NM_013491
94464_at	chloride channel 3	Clcn3	NM_007711 /// NM_173876
103782_at	chloride channel Ka	Clcnka	NM_024412
160884_at	chloride intracellular channel 3	Clic3	NM_027085
94254_at	chloride intracellular channel 4 (mitochondrial)	Clic4	NM_013885
94255_g_at	chloride intracellular channel 4 (mitochondrial)	Clic4	NM_013885
97928_at	ceroid-lipofuscinosis, neuronal 6	Cln6	XM_134858
100579_s_at	clathrin, light polypeptide (Lca)	Clta	NM_016760
98593_at	cytidine monophospho-N-acetylneuraminic acid synthetase	Cmas	NM_009908
102213_at	cardiomyopathy associated 1	Cmya1	NM_011724
99942_s_at	calponin 1	Cnn1	NM_009922
92495_at	CCR4-NOT transcription complex, subunit 4	Cnot4	NM_016877
99638_at	procollagen, type XVIII, alpha 1	Col18a1	NM_009929
101774_at	procollagen, type IV, alpha 4	Col4a4	NM_007735
93472_at	Procollagen, type V, alpha 1	Col5a1	NM_015734
104483_at	procollagen, type IX, alpha 1	Col9a1	NM_007740
97419_at	COMM domain containing 7	Commd7	NM_133850
160590_r_at	catechol-O-methyltransferase domain containing 1	Comtd1	NM_026965
98930_at	coatomer protein complex, subunit epsilon	Cope	NM_021538
94427_at	coatomer protein complex, subunit gamma	Copg	NM_017477 /// NM_201244
92875_s_at	COP9 (constitutive photomorphogenic) homolog, subunit 7a (Arabidopsis thaliana)	Cops7a	NM_012003
161675_f_at	coenzyme Q4 homolog (yeast)	Coq4	NM_178693
96234_at	cleavage and polyadenylation specificity factor 3	Cpsf3	NM_018813
103334_at	calcitonin gene-related peptide-receptor component protein	Crcp	NM_007761
102231_at	cAMP responsive element binding protein 3-like 1	Creb3l1	NM_011957
95886_g_at	CREB binding protein	Crebbp	XM_148699 /// XM_489496 /// XM_489497
98395_at	corticotropin releasing hormone receptor 2	Crhr2	NM_009953
101593_at	cysteine rich protein 2	Crip2	NM_024223
161046_at	cytokine receptor-like factor 1	Crlf1	NM_018827
103876_at	charged amino acid rich leucine zipper 1	Crlz1	NM_023054
104383_at	collapsin response mediator protein 1	Crmp1	NM_007765
93391_at	crystallin, gamma S	Crygs	NM_009967
103955_at	crystallin, lamda 1	Cryl1	NM_030004
99666_at	citrate synthase	Cs	NM_026444
95755_at	cold shock domain protein A	Csda	NM_011733 /// NM_139117
94747_at	colony stimulating factor 2 receptor, beta 1, low-affinity (granulocyte-macrophage)	Csf2rb1	NM_007780
94748_g_at	colony stimulating factor 2 receptor, beta 1, low-affinity (granulocyte-macrophage) /// colony stimulating factor 2 receptor, beta 2, low-affinity (granulocyte-macrophage)	Csf2rb1 /// Csf2rb2	NM_007780 /// NM_007781
95808_g_at	colony stimulating factor 3 receptor (granulocyte)	Csf3r	NM_007782
162504_at	C-src tyrosine kinase	Csk	NM_007783
99065_at	casein kappa	Csnk	NM_007786
100019_at	chondroitin sulfate proteoglycan 2	Cspg2	XM_488510
102853_at	chondroitin sulfate proteoglycan 6	Cspg6	NM_007790
161251_f_at	cathepsin C	Ctsc	NM_009982
94999_at	cubilin (intrinsic factor-cobalamin receptor)	Cubn	XM_130038
93630_at	CUG triplet repeat, RNA binding protein 1	Cugbp1	NM_017368 /// NM_198683
97255_at	CUG triplet repeat,RNA binding protein 2	Cugbp2	NM_010160
104288_at	cullin 4A	Cul4a	NM_146207
93129_at	cut-like 2 (Drosophila)	Cutl2	NM_007804
95335_at	chemokine (C-X3-C) receptor 1	Cx3cr1	NM_009987
95349_g_at	chemokine (C-X-C motif) ligand 1	Cxcl1	NM_008176
162234_f_at	chemokine (C-X-C motif) ligand 12	Cxcl12	NM_013655 /// NM_021704
101160_at	chemokine (C-X-C motif) ligand 2	Cxcl2	NM_009140
96228_at	cytochrome P450, family 11, subfamily a, polypeptide 1	Cyp11a1	NM_019779
101287_s_at	cytochrome P450, family 2, subfamily d, polypeptide 10	Cyp2d10	NM_010005
94540_at	cytochrome P450, family 2, subfamily d, polypeptide 26	Cyp2d26	NM_029562
94539_f_at	cytochrome P450, family 2, subfamily d, polypeptide 9 /// similar to Cytochrome P450 2D9 (CYPIID9) (P450-16-alpha) (CA) (Testosterone 16-alpha hydroxylase)	Cyp2d9 /// LOC380997	NM_010006 /// NM_201360
101307_at	cytochrome P450, family 4, subfamily a, polypeptide 12	Cyp4a12	NM_172306
99825_at	RIKEN cDNA D030022P06 gene	D030022P06Rik	XM_489207
94957_at	RIKEN cDNA D030028O16 gene	D030028O16Rik	NM_145984
94111_r_at	cDNA sequence D10627	D10627	XM_486116
102271_at	DNA segment, Chr 11, Brigham & Women's Genetics 0280e expressed	D11Bwg0280e	NM_001005867 /// NM_028601
160772_i_at	DNA segment, Chr 11, ERATO Doi 730, expressed	D11Ertd730e	NM_148673 /// NM_198936
160454_at	DNA segment, Chr 11, KL Mohlke 35	D11Moh35	NM_172300
94822_at	DNA segment, Chr 12, ERATO Doi 771, expressed	D12Ertd771e	NM_028262
162389_at	DNA segment, Chr 14, ERATO Doi 209, expressed	D14Ertd209e	---
161697_r_at	DNA segment, Chr 14, ERATO Doi 436, expressed	D14Ertd436e	NM_172599
100347_at	Expressed sequence D17892	D17892	---
96318_at	DNA segment, Chr 17, Wayne State University 104, expressed	D17Wsu104e	NM_080837
95679_at	DNA segment, Chr 19, ERATO Doi 144, expressed	D19Ertd144e	NM_026373
103768_at	DNA segment, Chr 19, ERATO Doi 678, expressed	D19Ertd678e	NM_023731
161333_f_at	DNA segment, Chr 1, ERATO Doi 161, expressed	D1Ertd161e	NM_026187
161770_f_at	DNA segment, Chr 1, ERATO Doi 161, expressed	D1Ertd161e	NM_026187
94480_at	DNA segment, Chr 1, ERATO Doi 161, expressed	D1Ertd161e	NM_026187
95708_at	DNA segment, Chr 3, University of California at Los Angeles 1	D3Ucla1	NM_030685
95397_at	RIKEN cDNA D430019H16 gene	D430019H16Rik	---
161715_f_at	DNA segment, Chr 4, ERATO Doi 196, expressed	D4Ertd196e	NM_025667
162028_f_at	DNA segment, Chr 4, Wayne State University 114, expressed	D4Wsu114e	NM_133873
95541_at	DNA segment, Chr 6, Wayne State University 176, expressed	D6Wsu176e	NM_138587
95863_at	DNA segment, Chr 8, ERATO Doi 67, expressed	D8Ertd67e	---
104411_at	RIKEN cDNA D930048N14 gene	D930048N14Rik	NM_175289
161766_i_at	DALR anticodon binding domain containing 3	Dalrd3	NM_026378
93842_at	death-associated protein	Dap	NM_146057
103430_at	drebrin 1	Dbn1	NM_019813
102566_at	deleted in colorectal carcinoma	Dcc	NM_007831
94067_at	decapping enzyme, scavenger	Dcps	NM_027030
102307_at	doublecortin	Dcx	NM_010025
103460_at	DNA-damage-inducible transcript 4	Ddit4	NM_029083
92969_at	discoidin domain receptor family, member 2	Ddr2	NM_022563
94361_at	DEAD (Asp-Glu-Ala-Asp) box polypeptide 21	Ddx21	NM_019553
95433_at	DEAD (Asp-Glu-Ala-Asp) box polypeptide 54	Ddx54	NM_028041
100882_at	defensin beta 1	Defb1	NM_007843
93862_i_at	Defensin related cryptdin 12	Defcr11	---
100351_f_at	defensin related cryptdin 3	Defcr3	NM_007850
93879_f_at	defensin related cryptdin 3	Defcr3	NM_007850
92812_f_at	defensin related cryptdin 3 /// defensin related cryptdin 4 /// defensin related cryptdin 6 /// RIKEN cDNA 2010016F14 gene	Defcr3 /// Defcr4 /// Defcr6 /// 2010016F14Rik	NM_007850 /// NM_007852 /// NM_010039 /// NM_183268
99551_f_at	defensin related cryptdin 5	Defcr5	NM_007851
93863_f_at	defensin related cryptdin 6	Defcr6	NM_007852
160769_at	Der1-like domain family, member 2	Derl2	NM_033562
162316_f_at	diacylglycerol O-acyltransferase 1	Dgat1	NM_010046
99544_at	deoxyguanosine kinase	Dguok	NM_013764
161397_r_at	dihydroorotate dehydrogenase	Dhodh	NM_020046
160405_at	deoxyhypusine synthase	Dhps	NM_201408
104681_at	diaphanous homolog 1 (Drosophila)	Diap1	NM_007858
161990_f_at	Diaphanous homolog 1 (Drosophila)	Diap1	NM_007858
93188_at	dickkopf homolog 3 (Xenopus laevis)	Dkk3	NM_015814
104136_at	discs, large homolog-associated protein 4 (Drosophila)	Dlgap4	NM_146128
101975_at	delta-like 1 homolog (Drosophila)	Dlk1	NM_010052
98867_at	distal-less homeobox 6, antisense	Dlx6as	---
101417_at	DMRT-like family B with proline-rich C-terminal, 1	Dmrtb1	XM_205469
96254_at	DnaJ (Hsp40) homolog, subfamily B, member 1	Dnajb1	NM_018808
98451_at	DnaJ (Hsp40) homolog, subfamily B, member 10	Dnajb10	NM_020266 /// NM_178055
98572_at	DnaJ (Hsp40) homolog, subfamily B, member 11	Dnajb11	NM_026400
102620_at	DnaJ (Hsp40) homolog, subfamily B, member 5	Dnajb5	NM_019874
103645_at	DnaJ (Hsp40) homolog, subfamily B, member 8	Dnajb8	NM_019964
103903_at	DnaJ (Hsp40) homolog, subfamily C, member 11	Dnajc11	NM_172704
94343_at	DnaJ (Hsp40) homolog, subfamily C, member 3	Dnajc3	NM_008929
93199_at	DnaJ (Hsp40) homolog, subfamily C, member 8	Dnajc8	NM_172400
103031_g_at	dynamin 1	Dnm1	NM_010065
100775_at	DNA methyltransferase 3B	Dnmt3b	NM_001003960 /// NM_001003961 /// NM_001003963 /// NM_010068
101191_at	double C2, beta	Doc2b	NM_007873
161358_r_at	dipeptidase 3	Dpep3	NM_027960
98298_at	dihydropyrimidinase-like 2	Dpysl2	NM_009955
160449_at	down-regulator of transcription 1	Dr1	NM_026106
93285_at	dual specificity phosphatase 6	Dusp6	NM_026268
100495_at	dishevelled 2, dsh homolog (Drosophila)	Dvl2	NM_007888
95949_at	DNA segment, Chr X, ERATO Doi 11, expressed	DXErtd11e	---
104079_at	dual-specificity tyrosine-(Y)-phosphorylation regulated kinase 1a	Dyrk1a	NM_007890
160712_r_at	RIKEN cDNA E130012A19 gene	E130012A19Rik	NM_175332
102881_at	RIKEN cDNA E130103I17 gene	E130103I17Rik	NM_181316
100765_at	RIKEN cDNA E230011A21 gene	E230011A21Rik	NM_177091
103669_at	RIKEN cDNA E330034G19 gene	E330034G19Rik	XM_138939
102958_at	early B-cell factor 2	Ebf2	NM_010095
97411_at	ect2 oncogene	Ect2	NM_007900
93393_at	ectodysplasin-A	Eda	NM_010099
93395_g_at	ectodysplasin-A	Eda	NM_010099
96322_at	endothelial differentiation-related factor 1	Edf1	NM_021519
99372_at	endothelial differentiation, sphingolipid G-protein-coupled receptor, 5	Edg5	NM_010333
100695_at	endothelin 2	Edn2	NM_007902
94766_at	eukaryotic translation elongation factor 1 alpha 1	Eef1a1	NM_010106
160129_at	eukaryotic translation elongation factor 1 delta (guanine nucleotide exchange protein)	Eef1d	NM_023240 /// NM_029663
97559_at	eukaryotic translation elongation factor 2	Eef2	NM_007907
102869_at	ephrin A2	Efna2	NM_007909
101840_at	epidermal growth factor receptor	Egfr	NM_007912 /// NM_207655
96338_at	EGL nine homolog 2 (C. elegans)	Egln2	NM_053208
161802_i_at	Early growth response 1	Egr1	NM_007913
93358_at	eukaryotic translation initiation factor 1A, Y-linked	Eif1ay	NM_025437
94253_at	eukaryotic translation initiation factor 2, subunit 1 alpha	Eif2s1	NM_026114
160365_at	eukaryotic translation initiation factor 2, subunit 2 (beta)	Eif2s2	NM_026030
101695_at	Eukaryotic translation initiation factor 3, subunit 6	Eif3s6	NM_008388
160554_at	eukaryotic translation initiation factor 3, subunit 6	Eif3s6	NM_008388
99101_at	eukaryotic translation initiation factor 3, subunit 7 (zeta)	Eif3s7	NM_018749
94837_at	eukaryotic translation initiation factor 3, subunit 8	Eif3s8	NM_146200
93089_at	eukaryotic translation initiation factor 4A2	Eif4a2	NM_013506
100557_g_at	eukaryotic translation initiation factor 4B	Eif4b	NM_145625
161911_f_at	eukaryotic translation initiation factor 4E member 2	Eif4e2	NM_023314
100636_at	eukaryotic translation initiation factor 4E binding protein 1	Eif4ebp1	NM_007918
101072_at	Eukaryotic translation initiation factor 4E binding protein 2	Eif4ebp2	NM_010124
161611_f_at	EMI domain containing 1	Emid1	NM_080595
97982_at	EMI domain containing 2	Emid2	NM_024474
160568_at	enolase 1, alpha non-neuron	Eno1	NM_023119
102143_at	RIKEN cDNA 1700029K24 gene	Eno3	NM_007933
93589_at	ectonucleoside triphosphate diphosphohydrolase 4	Entpd4	NM_026174
102698_at	endothelial PAS domain protein 1	Epas1	NM_010137
92231_at	erythrocyte protein band 4.1-like 4a	Epb4.1l4a	NM_013512
103980_at	Eph receptor A2	Epha2	NM_010139
104673_at	Eph receptor A4	Epha4	NM_007936
162371_r_at	Eph receptor B6	Ephb6	NM_007680
104514_at	epsin 1	Epn1	NM_010147
101777_at	v-erb-a erythroblastic leukemia viral oncogene homolog 4 (avian)	Erbb4	XM_136682
100424_at	excision repair cross-complementing rodent repair deficiency, complementation group 1	Ercc1	NM_007948
102346_at	excision repair cross-complementing rodent repair deficiency, complementation group 3	Ercc3	NM_133658
161777_f_at	excision repair cross-complementing rodent repair deficiency,complementation group 5	Ercc5	NM_011729
93670_at	Ets2 repressor factor	Erf	NM_010155
93671_at	Ets2 repressor factor	Erf	NM_010155
94040_at	enhancer of rudimentary homolog (Drosophila)	Erh	NM_007951
98076_at	endoplasmic reticulum protein 29	Erp29	NM_026129
92553_at	esterase D/formylglutathione hydrolase	Esd	NM_016903
93945_at	estrogen receptor 1 (alpha)	Esr1	NM_007956
93946_at	estrogen receptor 1 (alpha)	Esr1	NM_007956
93947_g_at	estrogen receptor 1 (alpha)	Esr1	NM_007956
96755_at	Eukaryotic translation termination factor 1	Etf1	NM_144866
162144_at	electron transferring flavoprotein, beta polypeptide	Etfb	NM_026695
160393_at	ethanolamine kinase 1	Etnk1	XM_284250
100754_at	ecotropic viral integration site 1	Evi1	NM_007963
161808_f_at	Ena-vasodilator stimulated phosphoprotein	Evl	NM_007965
98815_at	even skipped homeotic gene 1 homolog	Evx1	NM_007966
98816_s_at	even skipped homeotic gene 1 homolog	Evx1	NM_007966
101899_at	coagulation factor II	F2	NM_010168
160902_at	factor 8-associated gene A	F8a	NM_007978
100500_at	Fas (TNFRSF6)-associated via death domain	Fadd	NM_010175
160895_at	Fanconi anemia, complementation group C	Fancc	NM_007985
97800_at	Fas-activated serine/threonine kinase	Fastk	NM_023229
99422_at	Finkel-Biskis-Reilly murine sarcoma virus (FBR-MuSV) ubiquitously expressed (fox derived)	Fau	NM_007990
161628_r_at	fibulin 1	Fbln1	NM_010180
94309_g_at	fibulin 1	Fbln1	NM_010180
93667_at	F-box and WD-40 domain protein 7, archipelago homolog (Drosophila)	Fbxw7	NM_080428
162281_at	farnesyl diphosphate synthetase	Fdps	NM_134469
99098_at	farnesyl diphosphate synthetase	Fdps	NM_134469
162122_f_at	ferredoxin reductase	Fdxr	NM_007997
99321_at	fer (fms/fps related) protein kinase, testis specific 2	Fert2	NM_008000
162435_f_at	fasciculation and elongation protein zeta 1 (zygin I)	Fez1	NM_183171
102619_at	FYVE, RhoGEF and PH domain containing 3	Fgd3	NM_015759
99424_at	fibroblast growth factor 14	Fgf14	NM_010201 /// NM_207667
98730_at	fibroblast growth factor 17	Fgf17	NM_008004
92957_at	fibroblast growth factor 3	Fgf3	NM_008007
162253_i_at	fibroblast growth factor receptor 3	Fgfr3	NM_008010
99148_at	fumarate hydratase 1	Fh1	NM_010209
100986_at	four and a half LIM domains 2	Fhl2	NM_010212
92365_at	c-fos induced growth factor	Figf	NM_010216
95489_at	flightless I homolog (Drosophila)	Fliih	NM_022009
95637_at	filamin, beta	Flnb	XM_127565
95095_at	flotillin 1	Flot1	NM_008027
95296_r_at	FMS-like tyrosine kinase 3	Flt3	NM_010229
162302_f_at	folate receptor 1 (adult)	Folr1	NM_008034
94618_at	forkhead box B2	Foxb2	NM_008023
102800_at	forkhead box C2	Foxc2	NM_013519
97789_at	forkhead box H1	Foxh1	NM_007989
160969_at	forkhead box K1	Foxk1	NM_010812 /// NM_199068
98306_g_at	forkhead box M1	Foxm1	NM_008021
92958_at	forkhead box O3	Foxo3	NM_019740
92416_at	frequenin homolog (Drosophila)	Freq	NM_019681
101810_at	follicle stimulating hormone receptor	Fshr	NM_013523
98817_at	follistatin	Fst	NM_008046
99381_at	fucosyltransferase 1	Fut1	NM_008051
101760_at	fucosyltransferase 2	Fut2	NM_018876
98143_at	fucosyltransferase 8	Fut8	NM_016893
99844_at	frizzled homolog 9 (Drosophila)	Fzd9	XM_284144
103333_at	glucose-6-phosphatase, catalytic	G6pc	NM_008061
103440_at	GA repeat binding protein, alpha	Gabpa	NM_008065
99342_at	gamma-aminobutyric acid (GABA-A) receptor, subunit delta	Gabrd	NM_008072
100693_at	gamma-aminobutyric acid (GABA-A) receptor, subunit gamma 3	Gabrg3	NM_008074
161594_f_at	galactose mutarotase	Galm	NM_176963
162031_f_at	galactose mutarotase	Galm	NM_176963
101806_at	galanin receptor 3	Galr3	NM_015738
161644_f_at	guanidinoacetate methyltransferase	Gamt	NM_010255
99067_at	growth arrest specific 6	Gas6	NM_019521
93925_at	GATA binding protein 6	Gata6	NM_010258
103498_at	glucagon receptor	Gcgr	NM_008101
102313_at	GTP cyclohydrolase 1	Gch1	NM_008102
96139_at	glucosidase 1	Gcs1	NM_020619
94192_at	ganglioside-induced differentiation-associated-protein 10	Gdap10	NM_010268
97313_at	guanosine diphosphate (GDP) dissociation inhibitor 1	Gdi1	NM_010273
94144_g_at	glial fibrillary acidic protein	Gfap	NM_010277
92448_s_at	glial cell line derived neurotrophic factor family receptor alpha 2	Gfra2	NM_008115
93575_at	gamma-glutamyl hydrolase	Ggh	NM_010281
100938_at	growth hormone releasing hormone	Ghrh	NM_010285
92690_at	gastric intrinsic factor	Gif	NM_008118
102552_at	gap junction membrane channel protein alpha 3	Gja3	NM_016975
102571_at	gap junction membrane channel protein beta 6	Gjb6	NM_001010937 /// NM_008128
94364_at	golgi apparatus protein 1	Glg1	NM_009149
104449_at	glycine receptor, beta subunit	Glrb	NM_010298
92615_at	gene model 137, (NCBI)	Gm137	XM_131359
162290_f_at	gene model 157, (NCBI)	Gm157	XM_133186
104266_at	gene model 98, (NCBI)	Gm98	XM_129233
93647_at	Gem-interacting protein	Gmip	NM_198101
100388_at	guanine nucleotide binding protein, alpha o	Gnao1	NM_010308
103844_at	guanine nucleotide binding protein, alpha o	Gnao1	NM_010308
99981_at	guanine nucleotide binding protein, alpha q polypeptide	Gnaq	NM_008139
96911_at	guanine nucleotide binding protein, beta 2	Gnb2	NM_010312
101290_at	gonadotropin releasing hormone 2	Gnrh2	NM_008145
94071_at	golgi SNAP receptor complex member 2	Gosr2	NM_019650
104614_at	glypican 1	Gpc1	NM_016696
102886_at	glypican 4	Gpc4	NM_008150
98984_f_at	glycerol phosphate dehydrogenase 2, mitochondrial	Gpd2	NM_010274
94566_at	G protein-coupled receptor 132	Gpr132	NM_019925
96201_at	G protein-coupled receptor 172B	Gpr172b	NM_029643
96943_at	G protein pathway suppressor 1	Gps1	NM_145370
160531_at	gene rich cluster, C2f gene	Grcc2f	NM_013536
95085_r_at	Glyoxylate reductase/hydroxypyruvate reductase	Grhpr	NM_080289
104684_at	glutamate receptor, ionotropic, NMDA1 (zeta 1)	Grin1	NM_008169
99382_at	glutamate receptor, ionotropic, NMDA2D (epsilon 4)	Grin2d	NM_008172
99160_s_at	glutamate receptor, ionotropic, N-methyl D-asparate-associated protein 1 (glutamate binding)	Grina	NM_023168
104057_at	GrpE-like 1, mitochondrial	Grpel1	NM_024478
103853_at	glutamate-rich WD repeat containing 1	Grwd1	NM_153419
160646_at	glutathione reductase 1	Gsr	NM_010344
97681_f_at	glutathione S-transferase, mu 3	Gstm3	NM_010359
94811_s_at	general transcription factor II H, polypeptide 1 /// necdin	Gtf2h1 /// Ndn	NM_008186 /// NM_010882
94559_at	general transcription factor III A	Gtf3a	NM_025652
103270_at	G two S phase expressed protein 1	Gtse1	NM_013882
95569_at	guanylate cyclase activator 2b (retina)	Guca2b	NM_008191
98727_at	guanylate cyclase 2e	Gucy2e	NM_008192
98544_at	guanylate kinase 1	Guk1	NM_008193
100597_at	glycogenin 1	Gyg1	NM_013755
97525_at	glycerol kinase	Gyk	NM_008194 /// NM_212444
95419_at	H1 histone family, member 0	H1f0	NM_008197
92180_at	H1 histone family, member X	H1fx	NM_198622
93120_f_at	histocompatibility 2, D region locus 1	H2-D1	NM_010380
97540_f_at	histocompatibility 2, D region locus 1	H2-D1	NM_010380
101652_i_at	histocompatibility 2, D region locus 4	H2-D4	NM_008200
101886_f_at	histocompatibility 2, D region	H2-L	---
100305_g_at	histocompatibility 2, M region locus 10.1	H2-M10.1	NM_013544
102161_f_at	histocompatibility 2, Q region locus 2	H2-Q2	NM_010392
98438_f_at	Histocompatibility 2, Q region locus 6	H2-Q7	NM_010394
96913_at	hydroxyacyl-Coenzyme A dehydrogenase/3-ketoacyl-Coenzyme A thiolase/enoyl-Coenzyme A hydratase (trifunctional protein), beta subunit	Hadhb	NM_145558
95485_at	L-3-hydroxyacyl-Coenzyme A dehydrogenase, short chain	Hadhsc	NM_008212
100042_at	hydroxyacyl glutathione hydrolase	Hagh	NM_024284
92580_at	histidyl-tRNA synthetase	Hars	NM_008214
99394_at	hyaluronan synthase 3	Has3	NM_008217
101490_at	HESB like domain containing 2	Hbld2	NM_026921
93328_at	histidine decarboxylase	Hdc	NM_008230
102949_g_at	hematopoietic cell transcript 1	Hemt1	NM_010416
101724_at	hairy and enhancer of split 2 (Drosophila)	Hes2	NM_008236
162488_at	hexosaminidase A	Hexa	NM_010421
96994_at	hypermethylated in cancer 1	Hic1	NM_010430
160404_at	histone H1-like protein in spermatids 1	Hils1	NM_018792
97551_at	huntingtin interacting protein 1 related	Hip1r	NM_145070
160176_at	histone cell cycle regulation defective interacting protein 5	Hirip5	NM_020045
94288_at	histone 1, H1c	Hist1h1c	NM_015786
162169_r_at	Histone 1, H2bp	Hist1h2bp	NM_178202
102014_at	homer homolog 3 (Drosophila)	Homer3	NM_011984
161670_f_at	homeo box A11, opposite strand transcript	Hoxa11s	---
102580_r_at	homeo box A6	Hoxa6	NM_010454
103666_at	homeo box B5	Hoxb5	NM_008268
103741_at	homeo box D10	Hoxd10	NM_013554
102567_at	homeo box D13	Hoxd13	NM_008275
102380_s_at	homeo box D4	Hoxd4	NM_010469
161367_f_at	Hermansky-Pudlak syndrome 1 homolog (human)	Hps1	NM_019424
99875_at	hairless	Hr	NM_021877
92371_at	histidine rich calcium binding protein	Hrc	NM_010473
99815_at	histamine receptor H 2	Hrh2	NM_001010973 /// NM_008286
97515_at	hydroxysteroid (17-beta) dehydrogenase 4	Hsd17b4	NM_008292
98111_at	heat shock protein 105	Hsp105	NM_013559
101562_at	heat shock 70kDa protein 14	Hspa14	NM_015765
100946_at	heat shock protein 1B	Hspa1b	NM_010478
100353_g_at	heat shock protein 4	Hspa4	NM_008300
101955_at	heat shock 70kD protein 5 (glucose-regulated protein)	Hspa5	NM_022310
103215_g_at	heat shock protein 2	Hspb2	NM_024441
92829_at	heat shock protein 1 (chaperonin 10)	Hspe1	NM_008303
103671_at	HIV-1 tat interactive protein 2, homolog (human)	Htatip2	NM_016865
95323_at	5 hydroxytryptamine (serotonin) receptor 4	Htr4	NM_008313
101152_at	5-hydroxytryptamine (serotonin) receptor 5A	Htr5a	NM_008314
100282_at	5-hydroxytryptamine (serotonin) receptor 7	Htr7	NM_008315
102230_at	hyaluronidase 1 /// N-acetyltransferase 6	Hyal1 /// Nat6	NM_008317 /// NM_019750
160336_at	isoprenylcysteine carboxyl methyltransferase	Icmt	NM_133788
102640_at	predicted gene ICRFP703B1614Q5.5	ICRFP703B1614Q5.5	NM_020609
162160_at	Insulin degrading enzyme	Ide	NM_031156
96269_at	isopentenyl-diphosphate delta isomerase	Idi1	NM_145360 /// NM_177960
98465_f_at	interferon activated gene 204	Ifi204	NM_008329
160253_at	interferon induced transmembrane protein 3	Ifitm3	NM_025378
101015_s_at	interferon (alpha and beta) receptor 2	Ifnar2	NM_010509
98623_g_at	insulin-like growth factor 2	Igf2	NM_010514
92349_at	insulin-like growth factor binding protein-like 1	Igfbpl1	NM_018741
102152_f_at	Immunoglobulin heavy chain (S107 family)	Igh-VS107	XM_354717
160397_at	IK cytokine	Ik	NM_011879
103216_f_at	inhibitor of kappaB kinase gamma	Ikbkg	NM_010547 /// NM_178590
94168_at	interleukin 13	Il13	NM_008355
100764_at	interleukin 2 receptor, beta chain	Il2rb	NM_008368
98349_at	interleukin 6 signal transducer	Il6st	NM_010560
100578_at	inosine 5'-phosphate dehydrogenase 2	Impdh2	NM_011830
97858_at	inositol polyphosphate-5-phosphatase A	Inpp5a	NM_183144
95035_at	importin 4	Ipo4	NM_024267
100465_i_at	IQ motif containing F4	Iqcf4	NM_026090
100466_f_at	IQ motif containing F4 /// gene model 1673, (NCBI)	Iqcf4 /// Gm1673	NM_026090 /// XM_358631
100007_at	interferon regulatory factor 2 binding protein 1	Irf2bp1	NM_178757
103039_at	integrin alpha 5 (fibronectin receptor alpha)	Itga5	NM_010577
161497_f_at	integrin alpha 7	Itga7	NM_008398
93061_at	integrin alpha 7	Itga7	NM_008398
100990_g_at	integrin beta 1 binding protein 1	Itgb1bp1	NM_008403
100991_at	integrin beta 1 binding protein 1	Itgb1bp1	NM_008403
94171_at	integrin beta 2-like	Itgb2l	NM_008405
99904_at	integrin beta 3	Itgb3	NM_016780
94826_at	integrin beta 4 binding protein	Itgb4bp	NM_010579
102755_at	intelectin a	Itlna	NM_010584
93795_at	inosine triphosphatase (nucleoside triphosphate pyrophosphatase)	Itpa	NM_025922
93579_at	jagunal homolog 1 (Drosophila)	Jagn1	NM_026365
103310_at	jumonji, AT rich interactive domain 1B (Rbp2 like)	Jarid1b	NM_152895
100130_at	Jun oncogene	Jun	NM_010591
102363_r_at	Jun-B oncogene	Junb	NM_008416
102364_at	Jun proto-oncogene related gene d1	Jund1	NM_010592
96324_at	lysyl-tRNA synthetase	Kars	NM_053092
95071_at	potassium channel modulatory factor 1	Kcmf1	NM_019715
103208_at	potassium voltage gated channel, Shaw-related subfamily, member 1	Kcnc1	NM_008421
101302_at	potassium voltage-gated channel, Shal-related family, member 1	Kcnd1	NM_008423
99371_at	potassium voltage-gated channel, Shal-related family, member 3	Kcnd3	NM_019931
98787_at	potassium inwardly rectifying channel, subfamily J, member 11	Kcnj11	NM_010602
92522_at	potassium inwardly-rectifying channel, subfamily J, member 4	Kcnj4	NM_008427
104652_at	potassium channel, subfamily K, member 2	Kcnk2	NM_010607
94185_at	potassium channel, subfamily K, member 4	Kcnk4	NM_008431
95381_at	potassium channel, subfamily K, member 7	Kcnk7	NM_001004138 /// NM_010609
99322_at	potassium voltage-gated channel, subfamily Q, member 1	Kcnq1	NM_008434
161856_f_at	kinesin family member 20A	Kif20a	NM_009004
98471_f_at	kinesin family member C1	Kifc1	NM_016761
93890_at	kinesin family member C2	Kifc2	NM_010630
98288_at	kallikrein 4 (prostase, enamel matrix, prostate)	Klk4	NM_019928
104496_i_at	kallikrein 8	Klk8	NM_008457
92790_at	karyopherin (importin) alpha 2	Kpna2	NM_010655
101041_at	keratin complex 1, acidic, gene 14	Krt1-14	NM_016958
94270_at	keratin complex 1, acidic, gene 18	Krt1-18	NM_010664
97767_at	keratin complex 1, acidic, gene 2	Krt1-2	NM_010665
162106_f_at	keratin complex 1, acidic, gene 3	Krt1-3	XM_126759
96503_at	keratin complex 2, basic, gene 16	Krt2-16	NM_008474
101698_f_at	keratin complex 2, basic, gene 17	Krt2-17	NM_010668
93555_at	keratin complex 2, basic, gene 19	Krt2-19	XM_354889
96782_at	keratin complex 2, basic, gene 19	Krt2-19	XM_354889
92246_at	keratin associated protein 14	Krtap14	NM_013707
92253_at	keratin associated protein 6-2	Krtap6-2	NM_010673
103729_at	laminin, alpha 1	Lama1	NM_008480
100428_at	laminin, gamma 2	Lamc2	NM_008485
96123_at	lipopolysaccharide binding protein	Lbp	NM_008489
101133_at	lipocalin 3	Lcn3	NM_010694
104018_at	lactase	Lct	XM_129479
160354_at	LIM domain binding 3	Ldb3	NM_011918
102938_at	leukocyte cell-derived chemotaxin 2	Lect2	NM_010702
103629_g_at	lymphoid enhancer binding factor 1	Lef1	NM_010703
98444_g_at	leptin	Lep	NM_008493
101409_at	ligatin	Lgtn	NM_010709
92961_at	LIM homeobox protein 1	Lhx1	NM_008498
103253_at	lin 7 homolog b (C. elegans)	Lin7b	NM_011698
160270_at	lectin, mannose-binding, 1	Lman1	NM_027400
161472_r_at	lectin, mannose-binding 2	Lman2	NM_025828
93993_at	lectin, mannose-binding 2	Lman2	NM_025828
162176_r_at	similar to glyceraldehyde-3-phosphate dehydrogenase /// similar to glyceraldehyde-3-phosphate dehydrogenase (phosphorylating) (EC 1.2.1.12) - mouse /// similar to glyceraldehyde-3-phosphate dehydrogenase /// similar to glyceraldehyde-3-phosphate dehydrog	LOC14433 /// LOC223365 /// LOC380687 /// LOC382043 /// LOC384584 /// Gapd /// LOC432757 /// LOC436040	NM_001001303 /// NM_001001978 /// NM_008084 /// XM_122818 /// XM_356116 /// XM_484256 /// XM_488012 /// XM_488127
97570_at	similar to [Human Ig rearranged gamma chain mRNA, V-J-C region and complete cds.], gene product	LOC243461	XM_144837
102746_at	similar to selenoprotein W	LOC280621	NM_175033
94349_at	similar to Nur77 downstream protein 1	LOC381251	XM_355193
99824_at	similar to Protein phosphatase 2, regulatory subunit B (B56), alpha isoform	LOC434496	XM_486333
102575_at	similar to bM340H1.4 (orosomucoid 3)	LOC435786	XM_487800
93447_at	similar to zinc finger protein 331; C2H2-like zinc finger protein; zinc finger protein 463	LOC435956	XM_488007
93714_f_at	similar to MHC class I-alpha	LOC436489	XM_489782
97173_f_at	similar to MHC class I-alpha	LOC436489	XM_489782
97125_f_at	MHC (A.CA/J(H-2K-f) class I antigen	LOC56628	NM_019909
162324_at	Loricrin	Lor	NM_008508
96736_at	LIM domain containing preferred translocation partner in lipoma	Lpp	NM_178665
103806_at	low density lipoprotein receptor-related protein 5	Lrp5	NM_008513
102409_at	LSM8 homolog, U6 small nuclear RNA associated (S. cerevisiae)	Lsm8	NM_133939
94791_s_at	leukocyte tyrosine kinase	Ltk	NM_008523 /// NM_203345 /// NM_206941 /// NM_206942
162216_i_at	lymphocyte antigen 6 complex, locus D	Ly6d	NM_010742
99437_at	lymphocyte antigen 6 complex, locus F	Ly6f	NM_008530
93197_at	lymphocyte antigen 6 complex, locus G6C	Ly6g6c	NM_023463
100302_at	v-maf musculoaponeurotic fibrosarcoma oncogene family, protein F (avian)	Maff	NM_010755
95782_at	melanoma antigen, family B, 3	Mageb3	NM_008545
99089_at	myelin and lymphocyte protein, T-cell differentiation protein	Mal	NM_010762
160287_at	microtubule-associated protein 1 light chain 3 beta	Map1lc3b	NM_026160
160288_at	microtubule-associated protein 1 light chain 3 beta	Map1lc3b	NM_026160
92585_at	mitogen activated protein kinase kinase 1	Map2k1	NM_008927
97137_at	Mitogen activated protein kinase kinase 3	Map2k3	NM_008928
99037_at	mitogen activated protein kinase kinase 7	Map2k7	NM_011944
161619_f_at	mitogen activated protein kinase 8 interacting protein 1	Mapk8ip1	NM_011162
162332_f_at	microtubule-associated protein, RP/EB family, member 3	Mapre3	NM_133350
102743_at	microtubule-associated protein tau	Mapt	NM_010838
104244_at	MAP/microtubule affinity-regulating kinase 2	Mark2	NM_007928
99439_at	MAS1 oncogene	Mas1	NM_008552
98481_at	mannan-binding lectin serine protease 2	Masp2	NM_001003893 /// NM_010767
94469_at	methionine adenosyltransferase II, beta	Mat2b	NM_134017
104428_s_at	megakaryocyte-associated tyrosine kinase	Matk	NM_010768
160458_at	melanoma cell adhesion molecule	Mcam	NM_023061
94940_at	methylcrotonoyl-Coenzyme A carboxylase 1 (alpha)	Mccc1	NM_023644
97451_at	multiple coagulation factor deficiency 2	Mcfd2	NM_139295 /// NM_176808
93093_at	myeloid cell leukemia sequence 1	Mcl1	NM_008562
92711_at	mast cell protease 6	Mcpt6	NM_010781
97109_at	mast cell protease 7	Mcpt7	NM_031187
100434_s_at	MyoD family inhibitor	Mdfi	NM_010783
97508_at	malate dehydrogenase 1, NAD (soluble)	Mdh1	NM_008618
97970_at	antigen p97 (melanoma associated) identified by monoclonal antibodies 133.2 and 96.5	Mfi2	NM_013900
98292_at	G substrate	MGI:1333876	NM_011153
97228_at	leucine zipper domain protein	MGI:1913299	NM_133185
96342_at	HSPC171 protein	MGI:1913570	NM_025486
103254_at	FLN29 gene product	MGI:1923551	NM_172275
161576_f_at	FLN29 gene product	MGI:1923551	NM_172275
96249_at	selenoprotein	MGI:1927947	NM_053102
93997_at	interferon alpha responsive gene	MGI:1929890	NM_022329
99534_at	ghrelin	MGI:1930008	NM_021488
99164_at	mitogen activated protein binding protein interacting protein	MGI:1932697	NM_031248
96900_at	Nur77 downstream gene 2	MGI:2143558	NM_175329
92307_at	Ng23 protein	MGI:2388100	---
94203_at	Mblk1-related protein-2	MGI:2443930	NM_172154
97386_at	ES neuronal differentiation 2	MGI:2662729	---
97510_at	Monoglyceride lipase	Mgll	NM_011844
104410_at	midnolin	Midn	NM_021565
101070_at	makorin, ring finger protein, 1	Mkrn1	NM_018810
104253_at	myeloid/lymphoid or mixed lineage-leukemia translocation to 1 homolog (Drosophila)	Mllt1	NM_022328
103925_at	myeloid/lymphoid or mixed lineage-leukemia translocation to 3 homolog (Drosophila)	Mllt3	NM_027326 /// NM_029931
162400_f_at	MMS19 (MET18 S. cerevisiae)-like	Mms19l	NM_028152
161557_at	menage a trois 1	Mnat1	NM_008612
92300_at	max binding protein	Mnt	NM_010813
100728_at	multiple PDZ domain protein	Mpdz	NM_010820
93715_at	myelin protein zero	Mpz	NM_008623
102019_at	mitochondrial ribosomal protein L13	Mrpl13	NM_026759
95067_at	mitochondrial ribosomal protein L2	Mrpl2	NM_025302
95736_at	mitochondrial ribosomal protein L4	Mrpl4	NM_023167
99630_at	mitochondrial ribosomal protein L54	Mrpl54	NM_025317
97251_at	mitochondrial ribosomal protein S10	Mrps10	NM_183086
97884_at	mitochondrial ribosomal protein S11	Mrps11	NM_026498
95498_at	mitochondrial ribosomal protein S15	Mrps15	NM_025544
94327_at	mitochondrial ribosomal protein S18A	Mrps18a	NM_026768
95159_at	mitochondrial ribosomal protein S18B	Mrps18b	NM_025878
160621_at	mitochondrial ribosomal protein S22	Mrps22	NM_025485
98610_at	mitochondrial ribosomal protein S28	Mrps28	NM_025434
92912_at	homeo box, msh-like 3	Msx3	NM_010836
101855_at	microtubule-associated protein 6	Mtap6	NM_010837
102096_f_at	major urinary protein 1 /// major urinary protein 2	Mup1 /// Mup2	NM_008647 /// NM_031188
100071_at	Major urinary protein 2	Mup2	NM_008647
101909_f_at	major urinary protein 3	Mup3	NM_010845
101910_f_at	major urinary protein 3	Mup3	NM_010845
95632_f_at	mevalonate kinase	Mvk	NM_023556
99024_at	Max dimerization protein 4	Mxd4	NM_010753
101010_at	MYB binding protein (P160) 1a	Mybbp1a	NM_016776
102581_at	myc-like oncogene, s-myc protein	Mycs	NM_010850
92541_at	myosin, light polypeptide 1	Myl1	NM_021285
97542_at	Myosin, light polypeptide 6, alkali, smooth muscle and non-muscle	Myl6	NM_010860
161747_i_at	Myosin Vb	Myo5b	NM_201600
92407_at	myomesin 1	Myom1	NM_010867
104555_at	myozenin 1	Myoz1	NM_021508
101694_f_at	MYST histone acetyltransferase 2	Myst2	NM_177619
95347_at	myelin transcription factor 1	Myt1	NM_008665
100962_at	Ngfi-A binding protein 2	Nab2	NM_008668
104439_at	N-acetyltransferase 6	Nat6	NM_019750
94910_at	nuclear distribution gene E homolog 1 (A nidulans)	Nde1	NM_023317
103220_at	necdin-like 2	Ndnl2	NM_023239
92976_at	Norrie disease homolog	Ndph	NM_010883
94541_at	NADH dehydrogenase (ubiquinone) 1 beta subcomplex 4	Ndufb4	NM_026610
96267_at	NADH dehydrogenase (ubiquinone) flavoprotein 1	Ndufv1	NM_133666
160097_at	neuroendocrine secretory protein antisense	Nespas	---
93073_at	nuclear factor of activated T-cells, cytoplasmic, calcineurin-dependent 2	Nfatc2	NM_010899
102050_at	nuclear factor of activated T-cells, cytoplasmic, calcineurin-dependent 3	Nfatc3	NM_010901
92894_s_at	nuclear factor I/A	Nfia	NM_010905
93006_at	nuclear factor I/C	Nfic	NM_008688
98427_s_at	nuclear factor of kappa light chain gene enhancer in B-cells 1, p105	Nfkb1	NM_008689
93178_at	neuronal guanine nucleotide exchange factor	Ngef	NM_019867
93563_s_at	nidogen 2	Nid2	NM_008695
96422_at	NK2 transcription factor related, locus 9 (Drosophila)	Nkx2-9	NM_008701
92625_at	expressed in non-metastatic cells 2, protein	Nme2	NM_008705
94981_i_at	expressed in non-metastatic cells 3	Nme3	NM_019730
101424_at	N-myc (and STAT) interactor	Nmi	NM_019401
99417_at	neuromedin U receptor 1	Nmur1	NM_010341
104132_at	neighbor of Cox4	Noc4	NM_010926
101342_at	Notch gene homolog 2 (Drosophila)	Notch2	NM_010928
100712_at	neuronal PAS domain protein 1	Npas1	NM_008718
95390_at	neuronal PAS domain protein 2	Npas2	NM_008719
98614_at	nephronophthisis 1 (juvenile) homolog (human)	Nphp1	NM_016902
98507_at	nuclear receptor subfamily 1, group D, member 1	Nr1d1	NM_145434
101981_at	nuclear receptor subfamily 1, group H, member 2	Nr1h2	NM_009473
102171_r_at	nuclear receptor subfamily 1, group I, member 3	Nr1i3	NM_009803
104506_at	nuclear receptor subfamily 1, group I, member 3	Nr1i3	NM_009803
93385_at	nth (endonuclease III)-like 1 (E.coli)	Nthl1	NM_008743
95319_at	neurotensin receptor 1	Ntsr1	NM_018766
93137_at	neurotensin receptor 2	Ntsr2	NM_008747
160189_at	nudix (nucleoside diphosphate linked moiety X)-type motif 4	Nudt4	NM_027722
98975_at	nucleoporin 93	Nup93	NM_172410
92848_at	ornithine aminotransferase	Oat	NM_016978
101013_at	ornithine decarboxylase antizyme	Oaz1	NM_008753
101002_at	ornithine decarboxylase antizyme inhibitor	Oazin	NM_018745
92389_at	odd Oz/ten-m homolog 2 (Drosophila)	Odz2	NM_011856
101303_at	olfactory receptor 15	Olfr15	NM_008762
96982_g_at	olfactory receptor 1507 /// olfactory receptor 1508	Olfr1507 /// Olfr1508	NM_020512 /// NM_020513
96984_at	olfactory receptor 1509	Olfr1509	NM_020514
97000_s_at	olfactory receptor 156 /// olfactory receptor 157	Olfr156 /// Olfr157	NM_019474 /// NM_019475
102554_at	olfactory receptor 16	Olfr16	NM_008763
95712_at	origin recognition complex, subunit 6-like (S. cerevisiae)	Orc6l	NM_019716
96808_at	open reading frame 31	ORF31	NM_030890
98065_at	ORM1-like 3 (S. cerevisiae)	Ormdl3	NM_025661
94625_at	otogelin	Otog	NM_013624
100521_at	oviductal glycoprotein 1	Ovgp1	NM_007696
102092_s_at	oviductal glycoprotein 1	Ovgp1	NM_007696
94775_at	oxytocin	Oxt	NM_011025
101712_at	purinergic receptor P2X, ligand-gated ion channel, 7	P2rx7	NM_011027
94631_at	purinergic receptor P2X-like 1, orphan receptor	P2rxl1	NM_011028
92949_at	protein kinase C and casein kinase substrate in neurons 1	Pacsin1	NM_011861 /// NM_178365
95343_at	peptidyl arginine deiminase, type I	Padi1	NM_011059
99023_at	platelet-activating factor acetylhydrolase, isoform 1b, alpha2 subunit	Pafah1b2	NM_008775
100576_at	platelet-activating factor acetylhydrolase, isoform 1b, alpha1 subunit	Pafah1b3	NM_008776
92423_at	par-6 (partitioning defective 6,) homolog alpha (C. elegans)	Pard6a	NM_019695
100903_at	poly (ADP-ribose) polymerase family, member 2	Parp2	NM_009632
102578_at	paired box gene 5	Pax5	NM_008782
101769_at	protocadherin alpha 10	Pcdha10	NM_009961
101772_r_at	protocadherin alpha 11	Pcdha11	NM_009960
101650_at	protocadherin alpha 4 /// protocadherin alpha 6 /// protocadherin alpha 7 /// protocadherin alpha 5 /// protocadherin alpha 11 /// protocadherin alpha 10 /// protocadherin alpha 1 /// protocadherin alpha 9 /// protocadherin alpha 3 /// protocadherin alpha	Pcdha4 /// Pcdha6 /// Pcdha7 /// Pcdha5 /// Pcdha11 /// Pcdha10 /// Pcdha1 /// Pcdha9 /// Pcdha3 /// Pcdha12 /// Pcdha2 /// Pcdha8 /// Pcdhac1 /// Pcdhac2	NM_001003671 /// NM_001003672 /// NM_007766 /// NM_007767 /// NM_009957 /// NM_009959 /// NM_009960 /// NM_009961 /// NM_054072 /// NM_138661 /// NM_138662 /// NM_138663 /// NM_198117 /// NM_201243
102376_r_at	Purkinje cell protein 2 (L7)	Pcp2	NM_008790
160899_at	Purkinje cell protein 4	Pcp4	NM_008791
160264_s_at	Purkinje cell protein 4-like 1	Pcp4l1	XM_484933
99035_at	phosphate cytidylyltransferase 1, choline, alpha isoform	Pcyt1a	NM_009981
93382_at	phosphodiesterase 1B, Ca2+-calmodulin dependent	Pde1b	NM_008800
160602_at	phosphodiesterase 6D, cGMP-specific, rod, delta	Pde6d	NM_008801
98102_at	pyruvate dehydrogenase E1 alpha 1	Pdha1	NM_008810
102049_at	pyruvate dehydrogenase kinase, isoenzyme 4	Pdk4	NM_013743
102845_at	PDZ and LIM domain 7	Pdlim7	NM_026131
99156_at	PDZ domain containing 11	Pdzk11	NM_028303
97830_at	platelet/endothelial cell adhesion molecule 1	Pecam1	NM_008816
98017_at	pelota homolog (Drosophila)	Pelo	NM_134058
101368_at	placentae and embryos oncofetal gene	Pem	NM_008818
103660_at	peroxisomal biogenesis factor 11a	Pex11a	NM_011068
160641_at	6-phosphofructo-2-kinase/fructose-2,6-biphosphatase 3	Pfkfb3	NM_133232 /// NM_172976
160091_at	phosphoglycerate mutase 1	Pgam1	NM_023418
93346_at	phosphoglycerate kinase 1	Pgk1	NM_008828
98056_at	pleckstrin homology-like domain, family A, member 3	Phlda3	NM_013750
101705_at	per-hexamer repeat gene 1	Phxr1	NM_011080
96608_at	phytanoyl-CoA hydroxylase	Phyh	NM_010726
104699_at	phosphoinositide-3-kinase, class 3	Pik3c3	NM_181414
99438_at	Phosphatidylinositol 4-kinase, catalytic, alpha polypeptide	Pik4ca	NM_001001983
99384_at	proviral integration site 1	Pim1	NM_008842
94119_at	phosphatidylinositol-4-phosphate 5-kinase, type 1 gamma	Pip5k1c	NM_008844
92920_at	paired-like homeodomain transcription factor 1	Pitx1	NM_011097
99843_at	paired-like homeodomain transcription factor 3	Pitx3	NM_008852
101471_at	pyruvate kinase liver and red blood cell	Pklr	NM_013631
162032_f_at	pyruvate kinase, muscle	Pkm2	NM_011099
104337_f_at	plakophilin 2	Pkp2	NM_026163
161034_at	phospholipase A2, group X	Pla2g10	NM_011987
104201_at	placental specific protein 1	Plac1	NM_019538
98290_at	phospholipase C, gamma 1	Plcg1	NM_021280
161024_at	Pleckstrin homology domain containing, family A member 7	Plekha7	NM_172743
97915_at	pleckstrin homology domain containing, family B (evectins) member 2	Plekhb2	NM_145516
92802_s_at	proteolipid protein (myelin) 1	Plp1	NM_011123
96464_at	plexin B2	Plxnb2	XM_484491
96848_at	peptidase (mitochondrial processing) alpha	Pmpca	NM_173180
93290_at	purine-nucleoside phosphorylase	Pnp	NM_013632
94920_at	pyridoxine 5'-phosphate oxidase	Pnpo	NM_134021
160703_at	polymerase (DNA-directed), delta interacting protein 3	Poldip3	NM_178627
162307_at	polymerase (DNA directed), kappa	Polk	NM_012048
93325_at	polymerase (RNA) II (DNA directed) polypeptide E	Polr2e	XM_282920
94073_at	polymerase (RNA) II (DNA directed) polypeptide G	Polr2g	NM_026329
102893_at	POU domain, class 2, transcription factor 1	Pou2f1	NM_011137 /// NM_198932 /// NM_198933 /// NM_198934
102894_g_at	POU domain, class 2, transcription factor 1	Pou2f1	NM_011137 /// NM_198932 /// NM_198933 /// NM_198934
95553_at	Phosphoribosyl pyrophosphate amidotransferase	Ppat	---
160771_r_at	Protein tyrosine phosphatase, receptor-type, F interacting protein, binding protein 2	Ppfibp2	NM_008905
101207_at	peptidylprolyl isomerase A	Ppia	NM_008907
102278_at	peptidylprolyl isomerase E (cyclophilin E)	Ppie	NM_019489
102223_at	periplakin	Ppl	NM_008909
101837_g_at	protein phosphatase 1B, magnesium dependent, beta isoform	Ppm1b	NM_011151
92879_at	protein phosphatase 1G (formerly 2C), magnesium-dependent, gamma isoform	Ppm1g	NM_008014
99183_at	Protein phosphatase 3, regulatory subunit B, alpha isoform (calcineurin B, type I)	Ppp3r1	NM_024459
104610_at	peroxisome proliferative activated receptor, gamma, coactivator-related 1	Pprc1	XM_358330 /// XM_359412
98426_at	palmitoyl-protein thioesterase 2	Ppt2	NM_019441
97055_s_at	peroxiredoxin 1	Prdx1	NM_011034
97758_at	peroxiredoxin 1	Prdx1	NM_011034
96956_at	peroxiredoxin 5	Prdx5	NM_012021
100332_s_at	peroxiredoxin 6 /// peroxiredoxin 6, related sequence 1	Prdx6 /// Prdx6-rs1	NM_007453 /// NM_177256
93931_at	perforin 1 (pore forming protein)	Prf1	NM_011073
160808_at	protein kinase, AMP-activated, beta 1 non-catalytic subunit	Prkab1	NM_031869
101927_at	protein kinase, cAMP dependent regulatory, type I beta	Prkar1b	NM_008923
161638_f_at	protein kinase C, alpha binding protein	Prkcabp	NM_008837
93648_at	protein kinase C, gamma	Prkcc	NM_011102
160739_at	protein kinase, lysine deficient 1	Prkwnk1	NM_198703
161270_i_at	protein kinase, lysine deficient 1	Prkwnk1	NM_198703
94003_at	protein kinase, lysine deficient 1	Prkwnk1	NM_198703
93242_at	protamine 3	Prm3	NM_013638
103452_at	proline dehydrogenase (oxidase) 2	Prodh2	NM_019546
160750_at	phosphoribosyl pyrophosphate synthetase-associated protein 2	Prpsap2	NM_144806
160328_at	protease, serine, 15	Prss15	NM_028782
104185_at	protease, serine, 32	Prss32	NM_027220
162205_f_at	protease, serine, 32	Prss32	NM_027220
102214_at	periaxin	Prx	NM_019412 /// NM_198048
97114_at	prosaposin	Psap	NM_011179
103433_at	pleckstrin homology, Sec7 and coiled-coil domains 3	Pscd3	NM_011182
100733_at	proteasome (prosome, macropain) subunit, alpha type 2	Psma2	NM_008944
97459_at	proteasome (prosome, macropain) subunit, alpha type 4	Psma4	NM_011966
93988_at	proteasome (prosome, macropain) subunit, alpha type 7	Psma7	NM_011969
94025_at	proteasome (prosome, macropain) subunit, beta type 3	Psmb3	NM_011971
98557_f_at	proteasome (prosome, macropain) subunit, beta type 4	Psmb4	NM_008945
101558_s_at	proteasome (prosome, macropain) subunit, beta type 5	Psmb5	NM_011186
101992_at	proteasome (prosome, macropain) subunit, beta type 6	Psmb6	NM_008946
95448_at	proteasome (prosome, macropain) 26S subunit, ATPase 2	Psmc2	NM_011188
95742_at	proteasome (prosome, macropain) 26S subunit, non-ATPase, 13	Psmd13	NM_011875
161674_i_at	Proteasome (prosome, macropain) 26S subunit, non-ATPase, 3	Psmd3	NM_009439
94302_at	proteasome (prosome, macropain) 26S subunit, non-ATPase, 4	Psmd4	NM_008951
100588_at	proteasome (prosome, macropain) 28 subunit, beta	Psme2	NM_011190
100080_at	parotid secretory protein	Psp	NM_008953
103393_at	paraspeckle protein 1	Pspc1	NM_025682
94159_at	platelet-activating factor receptor	Ptafr	XM_357441
101931_at	phosphatidylserine synthase 1	Ptdss1	NM_008959
94988_at	phosphatase and tensin homolog	Pten	NM_008960
92545_f_at	prostaglandin D2 synthase (brain)	Ptgds	NM_008963
92546_r_at	prostaglandin D2 synthase (brain)	Ptgds	NM_008963
99998_at	prostaglandin E receptor 1 (subtype EP1)	Ptger1	NM_013641
161694_f_at	prostaglandin-endoperoxide synthase 1	Ptgs1	NM_008969
103451_at	PTK2 protein tyrosine kinase 2 beta	Ptk2b	NM_172498
92325_at	PTK7 protein tyrosine kinase 7	Ptk7	NM_175168
100406_at	protein tyrosine phosphatase, non-receptor type 5	Ptpn5	NM_013643
92303_at	protein tyrosine phosphatase, receptor type, R	Ptprr	NM_011217
100454_at	protein tyrosine phosphatase, receptor type, U	Ptpru	NM_011214
92663_at	protein tyrosine phosphatase, receptor type, V	Ptprv	NM_007955
99901_at	polymerase I and transcript release factor	Ptrf	NM_008986
97325_at	PX domain containing serine/threonine kinase	Pxk	NM_145458
103047_at	peroxisomal membrane protein 3	Pxmp3	NM_008994
160339_at	pyrroline-5-carboxylate reductase family, member 2	Pycr2	NM_133705
94868_at	glutaminyl-tRNA synthetase	Qars	NM_133794
95096_at	quaking	Qk	NM_021881
96601_at	quiescin Q6	Qscn6	NM_023268
96602_g_at	quiescin Q6	Qscn6	NM_023268
160731_at	RAB25, member RAS oncogene family	Rab25	NM_016899
94269_at	Rab acceptor 1 (prenylated)	Rabac1	NM_010261
95077_at	RAB geranylgeranyl transferase, b subunit	Rabggtb	NM_011231
102117_at	RAB, member of RAS oncogene family-like 4	Rabl4	NM_025931
94953_at	Rac GTPase-activating protein 1	Racgap1	NM_012025
103840_at	RAD17 homolog (S. pombe)	Rad17	NM_011233
95953_at	RAD51-like 1 (S. cerevisiae)	Rad51l1	NM_009014
102649_s_at	retinoic acid early transcript 1, alpha /// retinoic acid early transcript beta /// retinoic acid early transcript gamma /// retinoic acid early transcript delta /// retinoic acid early transcript 1E	Raet1a /// Raet1b /// Raet1c /// Raet1d /// Raet1e	NM_009016 /// NM_009017 /// NM_009018 /// NM_020030 /// NM_198193
102821_s_at	RAN, member RAS oncogene family /// RAS-like, family 2, locus 9	Ran /// Rasl2-9	NM_009028 /// NM_009391
99523_at	RAN binding protein 10	Ranbp10	NM_145824
93070_at	RAN binding protein 5	Ranbp5	NM_023579
96733_at	RAP1, GTP-GDP dissociation stimulator 1	Rap1gds1	NM_145544
99874_at	RAP2B, member of RAS oncogene family	Rap2b	NM_028712
103960_at	Rap2 interacting protein	Rap2ip	NM_016759
102419_at	retinoic acid receptor, gamma	Rarg	NM_011244
92417_at	RAS protein activator like 1 (GAP1 like)	Rasal1	NM_013832
93222_at	retinoblastoma binding protein 9	Rbbp9	NM_015754
97254_at	RNA binding motif protein 8a	Rbm8a	NM_025875
160192_at	RNA binding motif protein, X chromosome retrogene	Rbmxrt	NM_009033
161882_f_at	retinol dehydrogenase 13 (all-trans and 9-cis)	Rdh13	NM_175372
100634_at	retinol dehydrogenase 7	Rdh7	NM_017473
160995_at	replication initiator 1	Repin1	NM_175099
162273_at	Replication initiator 1	Repin1	NM_175099
92900_at	RIKEN cDNA E230012J19 gene	Rere	XM_204015
93020_at	reduced expression 3	Rex3	NM_009052
161609_at	regulator of G-protein signaling 16	Rgs16	NM_011267
103604_at	regulator of G-protein signaling 19	Rgs19	NM_026446
103605_g_at	regulator of G-protein signaling 19	Rgs19	NM_026446
96567_at	rhodopsin	Rho	NM_145383
95547_at	ras homolog gene family, member D	Rhod	NM_007485
161551_f_at	RIO kinase 3 (yeast)	Riok3	NM_024182
96653_at	ribonuclease T2	Rnaset2	NM_026611
103718_at	ring finger protein 110	Rnf110	NM_009545
93958_at	ring finger protein 14	Rnf14	NM_020012
160722_at	RNA methyltransferase like 1	Rnmtl1	NM_183263
93723_at	receptor tyrosine kinase-like orphan receptor 2	Ror2	NM_013846
99951_at	RAR-related orphan receptor gamma	Rorc	NM_011281
161327_f_at	ribosomal protein L10A	Rpl10a	NM_011287
92577_f_at	ribosomal protein L37	Rpl37	NM_026069
97697_at	ribosomal protein L7	Rpl7	NM_011291
94237_at	ribophorin I	Rpn1	NM_133933
161347_r_at	RNA polymerase 1-1	Rpo1-1	NM_009085
92225_f_at	RNA polymerase 1-2	Rpo1-2	NM_009086
161379_at	RNA polymerase 1-4	Rpo1-4	NM_009088
99093_at	ribosomal protein S10	Rps10	NM_025963
96358_at	ribosomal protein S23	Rps23	NM_024175
162335_at	ribosomal protein S29	Rps29	NM_009093
98523_at	Ribosomal protein S29	Rps29	NM_009093
98007_at	ribosomal protein S6 kinase, polypeptide 2	Rps6ka2	NM_011299
94257_at	Ras-related GTP binding A	Rraga	NM_178376
96778_at	RRS1 ribosome biogenesis regulator homolog (S. cerevisiae)	Rrs1	NM_021511
160864_at	rhotekin	Rtkn	NM_009106 /// NM_133641
92677_s_at	runt related transcription factor 2	Runx2	NM_009820
92234_at	retinoid X receptor alpha	Rxra	NM_011305
101051_at	S100 calcium binding protein A3	S100a3	NM_011310
95301_at	S100 calcium binding protein A5	S100a5	NM_011312
160930_at	SAC1 (supressor of actin mutations 1, homolog)-like (S. cerevisiae)	Sacm1l	NM_030692
100635_at	SAR1a gene homolog 1 (S. cerevisiae)	Sara1	NM_009120
161339_f_at	seryl-aminoacyl-tRNA synthetase 2	Sars2	NM_023637
161681_i_at	seryl-aminoacyl-tRNA synthetase 2	Sars2	NM_023637
95752_at	Shwachman-Bodian-Diamond syndrome homolog (human)	Sbds	NM_023248
102808_at	sodium channel, voltage-gated, type I, beta polypeptide	Scn1b	NM_011322
95787_s_at	sterol carrier protein 2, liver	Scp2	NM_011327
162163_at	secretin	Sct	NM_011328
92755_f_at	secretin	Sct	NM_011328
92756_r_at	secretin	Sct	NM_011328
92578_at	small inducible cytokine subfamily E, member 1	Scye1	NM_007926
161370_f_at	syndecan 1	Sdc1	NM_011519
93043_at	stromal cell derived factor receptor 1	Sdfr1	NM_009145
95053_s_at	succinate dehydrogenase complex, subunit B, iron sulfur (Ip)	Sdhb	NM_023374
95091_at	SEC13-like 1 (S. cerevisiae)	Sec13l1	NM_024206
103953_at	SEC22 vesicle trafficking protein-like 1 (S. cerevisiae)	Sec22l1	NM_011342
98944_at	SEC23B (S. cerevisiae)	Sec23b	NM_019787
103871_at	Sec23 interacting protein	Sec23ip	XM_133737
93548_at	Sec61 beta subunit	Sec61b	NM_024171
160758_at	SEH1-like (S. cerevisiae	Seh1l	NM_028112
97791_at	sema domain, seven thrombospondin repeats (type 1 and type 1-like), transmembrane domain (TM) and short cytoplasmic domain, (semaphorin) 5B	Sema5b	NM_013661
99911_at	sema domain, transmembrane domain (TM), and cytoplasmic domain, (semaphorin) 6B	Sema6b	NM_013662
160700_i_at	sema domain, transmembrane domain (TM), and cytoplasmic domain, (semaphorin) 6C	Sema6c	NM_011351
101572_f_at	serine (or cysteine) proteinase inhibitor, clade A, member 1a	Serpina1a	NM_009243 /// NM_009245
101574_f_at	serine (or cysteine) proteinase inhibitor, clade A, member 1a /// serine (or cysteine) proteinase inhibitor, clade A, member 1d /// serine (or cysteine) proteinase inhibitor, clade A, member 1e	Serpina1a /// Serpina1d /// Serpina1e	NM_009243 /// NM_009245 /// NM_009246 /// NM_009247
93109_f_at	serine (or cysteine) proteinase inhibitor, clade A, member 1d	Serpina1d	NM_009246
100966_at	serine (or cysteine) proteinase inhibitor, clade D, member 1	Serpind1	NM_008223
161916_r_at	serine (or cysteine) proteinase inhibitor, clade F, member 2	Serpinf2	NM_008878
99081_at	serine (or cysteine) proteinase inhibitor, clade G, member 1	Serping1	NM_009776
92757_at	seizure related gene 6	Sez6	NM_021286
96029_at	Splicing factor 3a, subunit 3	Sf3a3	---
95791_s_at	splicing factor, arginine/serine-rich 2 (SC-35)	Sfrs2	NM_011358
103395_at	sarcoglycan, alpha (dystrophin-associated glycoprotein)	Sgca	NM_009161
96127_at	sphingosine phosphate lyase 1	Sgpl1	NM_009163
98848_at	SH3 domain protein 4	Sh3d4	NM_011366
95327_at	SH3 multiple domains 1	Sh3md1	NM_008018
100707_at	SH3 multiple domains 2	Sh3md2	NM_021506 /// NM_198678
97906_at	seven in absentia 2	Siah2	NM_009174
93789_s_at	transcriptional regulator, SIN3B (yeast)	Sin3b	NM_009188
96562_at	solute carrier family 11 (proton-coupled divalent metal ion transporters), member 1	Slc11a1	NM_013612
100370_at	solute carrier family 12, member 5	Slc12a5	NM_020333
100491_at	solute carrier family 16 (monocarboxylic acid transporters), member 2	Slc16a2	NM_009197
92612_at	solute carrier family 27 (fatty acid transporter), member 5	Slc27a5	NM_009512
101877_at	solute carrier family 31, member 1	Slc31a1	NM_175090
98994_at	solute carrier family 34 (sodium phosphate), member 2	Slc34a2	NM_011402
104042_at	solute carrier family 35, member B1	Slc35b1	XM_128634
103527_at	solute carrier family 35, member E4	Slc35e4	NM_153142
100373_at	solute carrier family 39 (zinc transporter), member 1	Slc39a1	NM_013901
162284_r_at	solute carrier family 39 (zinc transporter), member 4	Slc39a4	NM_028064
99133_at	solute carrier family 3 (activators of dibasic and neutral amino acid transport), member 2	Slc3a2	NM_008577
101609_at	solute carrier family 5 (sodium/glucose cotransporter), member 11	Slc5a11	NM_146198
103934_at	solute carrier family 6 (neurotransmitter transporter, GABA), member 13	Slc6a13	NM_144512
97465_at	solute carrier family 6 (neurotransmitter transporter), member 18	Slc6a18	NM_011730
99409_at	Solute carrier family 6 (neurotransmitter transporter, noradrenalin), member 2	Slc6a2	NM_009209
95625_at	solute carrier family 6 (neurotransmitter transporter, creatine), member 8	Slc6a8	NM_133987
93133_at	solute carrier family 7 (cationic amino acid transporter, y+ system), member 3	Slc7a3	NM_007515
104064_at	solute carrier family 9 (sodium/hydrogen exchanger), isoform 3 regulator 2	Slc9a3r2	NM_023055 /// NM_023449
94663_at	Solute carrier organic anion transporter family, member 5A1	Slco5a1	NM_172841
101437_at	STE20-like kinase (yeast)	Slk	NM_009289
95048_at	Sarcolipin	Sln	NM_025540
160196_at	stromal membrane-associated protein 1	Smap1	NM_028534
92345_g_at	SWI/SNF related, matrix associated, actin dependent regulator of chromatin, subfamily a, member 3	Smarca3	NM_009210 /// NM_144959
102062_at	SWI/SNF related, matrix associated, actin dependent regulator of chromatin, subfamily c, member 1	Smarcc1	NM_009211
161414_f_at	SWI/SNF related, matrix associated, actin dependent regulator of chromatin, subfamily d, member 2	Smarcd2	NM_031878
160630_at	spermine synthase	Sms	NM_009214
98559_at	smoothelin	Smtn	NM_013870
160177_at	smu-1 suppressor of mec-8 and unc-52 homolog (C. elegans)	Smu1	NM_021535
101904_at	SET and MYND domain containing 1	Smyd1	NM_009762
162269_at	SET and MYND domain containing 2	Smyd2	NM_026796
98077_at	small nuclear ribonucleoprotein D3	Snrpd3	NM_026095
162147_f_at	syntrophin, acidic 1	Snta1	NM_009228
99431_at	sterol O-acyltransferase 2	Soat2	NM_146064
162206_f_at	suppressor of cytokine signaling 3	Socs3	NM_007707
93698_at	SRY-box containing gene 13	Sox13	NM_011439
96824_at	SRY-box containing gene 15	Sox15	NM_009235
160109_at	SRY-box containing gene 4	Sox4	NM_009238
93832_at	sperm associated antigen 7	Spag7	NM_172561
94387_at	spermatogenesis associated 5	Spata5	NM_021343
94472_at	signal peptidase complex subunit 1 homolog (S. cerevisiae)	Spcs1	NM_026911
92477_at	spindlin	Spin	NM_011462 /// NM_146043
94358_at	serine protease inhibitor, Kazal type 4	Spink4	NM_011463
96101_at	serine protease inhibitor, Kunitz type 2	Spint2	NM_011464
99701_f_at	small proline-rich protein 2B	Sprr2b	NM_011469
95793_at	small proline-rich protein 2D	Sprr2d	NM_011470
98278_at	sprouty homolog 4 (Drosophila)	Spry4	NM_011898
94153_g_at	salivary protein 1 /// salivary protein 2	Spt1 /// Spt2	NM_009267 /// NM_009268
94515_at	sulfide quinone reductase-like (yeast)	Sqrdl	NM_021507
160323_at	steroid receptor RNA activator 1	Sra1	NM_025291
101519_at	signal recognition particle 14	Srp14	NM_009273
99556_s_at	sex determining region of Chr Y	Sry	NM_011564
162377_f_at	single stranded DNA binding protein 4	Ssbp4	NM_133772
101061_at	signal sequence receptor, beta	Ssr2	NM_025448
101318_at	somatostatin receptor 1	Sstr1	NM_009216
99889_at	somatostatin receptor 5	Sstr5	XM_139909
96723_f_at	synovial sarcoma, X breakpoint 2 interacting protein	Ssx2ip	NM_138744
94431_at	beta galactoside alpha 2,6 sialyltransferase 1	St6gal1	NM_145933
160232_at	ST6 (alpha-N-acetyl-neuraminyl-2,3-beta-galactosyl-1,3)-N-acetylgalactosaminide alpha-2,6-sialyltransferase 4	St6galnac4	NM_011373
96682_at	ST6 (alpha-N-acetyl-neuraminyl-2,3-beta-galactosyl-1,3)-N-acetylgalactosaminide alpha-2,6-sialyltransferase 4	St6galnac4	NM_011373
160943_at	stromal antigen 3	Stag3	NM_016964
94331_at	signal transducer and activator of transcription 6	Stat6	NM_009284
100081_at	stress-induced phosphoprotein 1	Stip1	NM_016737
162157_f_at	serine/threonine kinase 16	Stk16	NM_011494
93272_at	serine/threonine kinase 16	Stk16	NM_011494
98486_at	stathmin-like 4	Stmn4	NM_019675
100052_at	stomatin	Stom	NM_013515
98860_at	steroid sulfatase	Sts	NM_009293
160064_at	syntaxin 7	Stx7	NM_016797
162272_r_at	syntaxin binding protein 2	Stxbp2	NM_011503
96268_at	succinate-CoA ligase, GDP-forming, alpha subunit	Suclg1	NM_019879
101091_at	SMT3 suppressor of mif two 3 homolog 1 (yeast)	Sumo1	NM_009460
100585_at	suppressor of Ty 4 homolog 1 (S. cerevisiae) /// suppressor of Ty 4 homolog 2 (S. cerevisiae)	Supt4h1 /// Supt4h2	NM_009296 /// NM_011509
162113_r_at	synaptobrevin like 1	Sybl1	NM_011515
99531_at	synaptogyrin 4	Syngr4	NM_021482
96978_at	synaptotagmin-like 4	Sytl4	NM_013757
95066_at	transaldolase 1	Taldo1	NM_011528
103328_at	TRAF family member-associated Nf-kappa B activator	Tank	NM_011529
95054_at	threonyl-tRNA synthetase	Tars	NM_033074
96873_at	Tax1 (human T-cell leukemia virus type I) binding protein 1	Tax1bp1	NM_025816
162014_i_at	Tax1 (human T-cell leukemia virus type I) binding protein 3	Tax1bp3	NM_029564
98087_at	TANK-binding kinase 1	Tbk1	NM_019786
98937_at	transforming growth factor beta regulated gene 1	Tbrg1	NM_025289
95341_at	transforming growth factor beta regulated gene 4	Tbrg4	NM_134011
92602_at	titin-cap	Tcap	NM_011540
162247_r_at	Transcription elongation factor A (SII), 2	Tcea2	NM_009326
100082_at	transcription factor 1	Tcf1	NM_009327
104458_at	transcription factor 3	Tcf3	NM_009332
102241_f_at	transcription factor 7-like 2, T-cell specific, HMG-box	Tcf7l2	NM_009333
97660_s_at	transcription factor 7-like 2, T-cell specific, HMG-box	Tcf7l2	NM_009333
100359_at	T-complex protein 10c	Tcp10c	NM_009341
102747_at	t-complex-associated testis expressed 1	Tcte1	NM_013688
102867_at	TEA domain family member 4	Tead4	NM_011567
102868_g_at	TEA domain family member 4	Tead4	NM_011567
100296_at	testis expressed gene 2	Tex2	NM_198292
161382_at	transforming growth factor, beta 3	Tgfb3	NM_009368
102906_at	T-cell specific GTPase	Tgtp	NM_011579
100690_at	tyrosine hydroxylase	Th	NM_009377
99077_at	thyroid hormone receptor alpha	Thra	NM_178060
101402_at	thyroid hormone receptor associated protein 4	Thrap4	NM_011869
99602_at	TGFB inducible early growth response 1	Tieg1	NM_013692
99603_g_at	TGFB inducible early growth response 1	Tieg1	NM_013692
103795_f_at	T-cell immunoglobulin and mucin domain containing 2	Timd2	NM_134249
95441_at	translocase of inner mitochondrial membrane 23 homolog (yeast)	Timm23	NM_016897
101964_at	transketolase	Tkt	NM_009388
102732_at	Talin 1	Tln1	NM_011602
162089_r_at	talin 1	Tln1	NM_011602
92531_at	Translocation protein 1	Tloc1	NM_027016
100572_at	transmembrane 9 superfamily member 2	Tm9sf2	NM_080556
99619_at	transmembrane protein 41B	Tmem41b	NM_153525
93709_at	transmembrane protease, serine 8 (intestinal)	Tmprss8	NM_013921
161194_r_at	tumor necrosis factor receptor superfamily, member 1a	Tnfrsf1a	NM_011609
97683_at	tumor necrosis factor receptor superfamily, member 9	Tnfrsf9	NM_011612
101063_at	troponin C, cardiac/slow skeletal	Tnnc1	NM_009393
162325_f_at	troponin C2, fast	Tnnc2	NM_009394
94124_at	topoisomerase (DNA) III alpha	Top3a	NM_009410
100709_at	trophoblast specific protein alpha	Tpbpa	NM_009411
93266_at	tropomyosin 3, gamma	Tpm3	NM_022314
98832_at	thyroid peroxidase	Tpo	NM_009417
96730_at	tripeptidyl peptidase II	Tpp2	NM_009418
160499_at	tumor rejection antigen gp96	Tra1	NM_011631
160361_at	trafficking protein particle complex 4	Trappc4	NM_021789
102665_at	thyrotropin releasing hormone	Trh	NM_009426
161067_at	tribbles homolog 3 (Drosophila)	Trib3	NM_144554 /// NM_175093
100475_at	tripartite motif protein 25	Trim25	NM_009546
100553_at	tripartite motif protein 27	Trim27	NM_009054
93716_at	tripartite motif protein 46	Trim46	NM_017403 /// NM_183037
102251_at	transient receptor potential cation channel, subfamily M, member 1	Trpm1	XM_358370
102846_at	testis-specific serine kinase 2	Tssk2	NM_009436
160212_at	tetratricopeptide repeat domain 4	Ttc4	NM_028209
98805_at	tubby candidate gene	Tub	NM_021885
101315_at	tubulin alpha, related sequence 1	Tuba-rs1	---
161614_r_at	tubulin, beta 2	Tubb2	NM_009450
94835_f_at	tubulin, beta 2	Tubb2	NM_009450
98296_at	tubby like protein 1	Tulp1	NM_021478
160939_at	twist homolog 2 (Drosophila)	Twist2	NM_007855
94207_at	Thioredoxin domain containing 7	Txndc7	NM_027959
94209_g_at	thioredoxin domain containing 7	Txndc7	NM_027959
97900_at	thioredoxin domain containing 9	Txndc9	NM_172054
160547_s_at	thioredoxin interacting protein	Txnip	NM_023719
102103_f_at	thioredoxin-like 2	Txnl2	NM_023140
160437_at	thioredoxin reductase 2	Txnrd2	NM_013711
162282_f_at	TYRO3 protein tyrosine kinase 3	Tyro3	NM_019392
92818_at	ubiquitin-activating enzyme E1C	Ube1c	NM_011666
95703_at	ubiquitin-like 1 (sentrin) activating enzyme E1A	Uble1a	NM_019748
99575_at	ubiquilin 1	Ubqln1	NM_026842 /// NM_152234
102322_at	UDP-glucose dehydrogenase	Ugdh	NM_009466
96675_at	unc-50 homolog (C. elegans)	Unc50	NM_026123
92606_at	urate oxidase	Uox	NM_009474
161338_i_at	ubiquinol-cytochrome c reductase (6.4kD) subunit	Uqcr	NM_025650
99639_at	ubiquitin specific protease 10	Usp10	NM_009462
95416_at	ubiquitin specific protease 15	Usp15	NM_027604
95024_at	ubiquitin specific protease 18	Usp18	NM_011909
92820_at	ubiquitin specific protease 2	Usp2	NM_016808 /// NM_198091 /// NM_198092
92821_at	ubiquitin specific protease 2	Usp2	NM_016808 /// NM_198091 /// NM_198092
95027_at	ubiquitin specific protease 21	Usp21	NM_013919
98972_at	ubiquitin specific protease 8	Usp8	NM_019729
92508_s_at	utrophin	Utrn	NM_011682
95306_at	urotensin 2 receptor	Uts2r	NM_145440
102222_at	ubiquitously transcribed tetratricopeptide repeat gene, X chromosome	Utx	NM_009483
101645_f_at	vomeronasal 2, receptor, 10 /// vomeronasal 2, receptor, 11	V2r10 /// V2r11	NM_009486 /// NM_009487
95798_f_at	vomeronasal 2, receptor, 12 /// vomeronasal 2, receptor, 2 /// vomeronasal 2, receptor, 8 /// vomeronasal 2, receptor, 9	V2r12 /// V2r2 /// V2r8 /// V2r9	NM_009488 /// NM_009492 /// NM_009494 /// NM_009495
98521_at	vesicle-associated membrane protein 3	Vamp3	NM_009498
92560_g_at	vascular cell adhesion molecule 1	Vcam1	NM_011693
161255_at	voltage-dependent anion channel 2	Vdac2	NM_011695
99964_at	vitamin D receptor	Vdr	NM_009504
98375_at	Vasoactive intestinal peptide receptor 2	Vipr2	NM_009511
95709_at	vitamin K epoxide reductase complex, subunit 1	Vkorc1	NM_178600
104165_at	vanin 1	Vnn1	NM_011704
96847_at	vacuolar protein sorting 28 (yeast)	Vps28	NM_025842
102670_at	vacuolar protein sorting 54 (yeast)	Vps54	NM_139061
97052_at	Von Willebrand factor homolog	Vwf	NM_011708
102931_at	whey acidic protein	Wap	NM_011709
98606_s_at	tryptophanyl-tRNA synthetase	Wars	NM_011710
103807_at	widely-interspaced zinc finger motifs	Wiz	NM_011717 /// NM_212437 /// NM_212438
102667_at	wingless-related MMTV integration site 3A	Wnt3a	NM_009522
103238_at	wingless-related MMTV integration site 4	Wnt4	NM_009523
103513_at	wingless-related MMTV integration site 5B	Wnt5b	NM_009525
103415_at	Werner helicase interacting protein 1	Wrnip1	NM_030215
94821_at	X-box binding protein 1	Xbp1	NM_013842
101591_at	X-prolyl aminopeptidase (aminopeptidase P) 1, soluble	Xpnpep1	NM_133216
103783_at	xenotropic and polytropic retrovirus receptor 1	Xpr1	NM_011273
161560_f_at	X-ray repair complementing defective repair in Chinese hamster cells 1	Xrcc1	NM_009532
162093_at	Tyrosyl-tRNA synthetase	Yars	NM_134151
99020_at	YY1 transcription factor	Yy1	NM_009537
160445_at	zinc finger, BED domain containing 3	Zbed3	NM_028106
92202_g_at	zinc finger and BTB domain containing 16	Zbtb16	XM_134826
94780_at	zinc finger and BTB domain containing 20	Zbtb20	NM_019778
97743_at	zinc finger CCCH type domain containing 3	Zc3hdc3	NM_172121
104741_at	zinc finger, DHHC domain containing 9	Zdhhc9	NM_172465
98760_at	zinc finger homeodomain 4	Zfhx4	NM_030708
161881_f_at	zinc finger protein 259	Zfp259	NM_011752
161334_r_at	Zinc finger protein 277	Zfp277	NM_172575 /// NM_178845
100724_at	zinc finger protein 28	Zfp28	NM_175247
100898_r_at	Zinc finger protein 297	Zfp297	NM_020625
104437_at	zinc finger protein 30	Zfp30	NM_013705
93943_f_at	zinc finger protein 36, C3H type-like 2	Zfp36l2	NM_001001806 /// NM_007565
93944_r_at	zinc finger protein 36, C3H type-like 2	Zfp36l2	NM_001001806 /// NM_007565
102304_f_at	zinc finger protein 61	Zfp61	NM_009561
161927_at	zinc finger protein 622	Zfp622	NM_144523
104361_at	zinc finger protein 637	Zfp637	NM_177684
161465_r_at	zinc finger protein 94	Zfp94	NM_009568
94101_at	zinc finger protein 98	Zfp98	NM_016793 /// NM_145819
94630_at	zinc finger protein, subfamily 1A, 2 (Helios)	Zfpn1a2	NM_011770
98277_at	zinc finger protein, subfamily 1A, 4 (Eos)	Zfpn1a4	NM_011772
98844_at	Zic finger protein of the cerebellum 2	Zic2	NM_009574
162492_at	zinc finger proliferation 1	Zipro1	NM_011757
95157_at	zinc and ring finger 1	Znrf1	NM_133206
98310_at	zinc and ring finger 4	Znrf4	NM_011483
95932_at	zona pellucida glycoprotein 1	Zp1	NM_009580
